# Supplementary material for: A positive feedback loop between Flower and PI(4,5)P2 at periactive zones controls bulk endocytosis in Drosophila
Source: eLife. 2020 Dec 10;9:e60125. doi: 10.7554/eLife.60125 (PMC7748424; doi:10.7554/eLife.60125)
Supplement: Figure 1—figure supplement 3—source data 1. [file elife-60125-fig1-figsupp3-data1.xlsx]

## Sheet: 工作表1
Figure 1-figure supplement 3 Panel b (Normalized PM-associated AP-2α level)
At rest	High K+
0.422044	0.972024
0.596868	1.05868
0.600042	1.08145
0.623721	1.36566
0.755504	1.42138
0.786154	1.93896
1.5603	2.02472
1.9169	2.35088
