# Supplementary material for: A positive feedback loop between Flower and PI(4,5)P2 at periactive zones controls bulk endocytosis in Drosophila
Source: eLife. 2020 Dec 10;9:e60125. doi: 10.7554/eLife.60125 (PMC7748424; doi:10.7554/eLife.60125)
Supplement: Figure 1—source data 1. [file elife-60125-fig1-data1.xlsx]

## Sheet: 工作表1
Figure 1 Panel a (DF/F0)																Figure 1 Panel b (DF/F0)					Figure 1 Panel d (Normalized PM-associated PLCδ1-PH-EGFP level)					Figure 1 Panel f (PLCδ1-PH-EGFP cluster (μm2))
PLCδ1-PH-EGFP				PLCδ1-PH-EGFP				PLCδ1-PH-EGFP				mCD8-EGFP				PLCδ1-PH-EGFP	PLCδ1-PH-EGFP	PLCδ1-PH-EGFP	mCD8-EGFP		At rest	High K+/2 mM Ca2+	High K+/0 mM Ca2+	High K+/0.5 mM Ca2+		0.1208
At rest	20 Hz	Post-Stim		At rest	40 Hz	Post-Stim		At rest	High K+	Post-Stim		At rest	40 Hz	Post-Stim		20 Hz	40 Hz	High K+	40 Hz		0.338946	1.13764	0.304598	0.792582		0.127063
0	-0.02745	-0.02659		0	0.088167	-0.29055		0	0.173422	-0.1944		0	0.105278	0.080581		-0.02745	0.088167	0.173422	0.105278		0.388484	1.23548	0.388808	0.219173		0.106303
0	0.123632	-0.00648		0	0.131554	0.084382		0	0.53245	-0.04247		0	0.060234	-0.18112		0.123632	0.131554	0.53245	0.060234		0.46354	1.35822	0.354945	0.24704		0.054222
0	-0.05602	-0.16868		0	0.208783	-0.10376		0	0.07959	-0.07826		0	0.043599	-0.08768		-0.05602	0.208783	0.07959	0.043599		0.498828	1.82013	0.641935	0.345547		0.064
0	0.115864	-0.01071		0	0.207608	-0.00677		0	0.08532	-0.10247		0	-0.09926	-0.1384		0.115864	0.207608	0.08532	-0.09926		0.826064	2.11932	0.646485	0.733627		0.073462
0	-0.00106	-0.04256		0	0.483772	-0.1081		0	0.117264	0.012035		0	0.052968	-0.00079		-0.00106	0.483772	0.117264	0.052968		0.978457	2.30918	0.790688	0.551956		0.091731
0	0.207678	0.167821		0	0.361295	0.112004		0	0.059205	-0.33153						0.207678	0.361295	0.059205			1.2046	2.35005	1.40386	0.693344		0.078745
0	0.027199	0.037051						0	0.247631	0.145683						0.027199		0.247631			1.59299	2.47237	1.09538	0.488273		0.1193
0	0.063147	0.059053						0	0.222266	-0.14824						0.063147		0.222266			1.63545	2.76236	0.182602	0.714329		0.085341
0	0.023257	-0.00024														0.023257					2.07263		0.924649	0.313366		0.070692
0	0.090842	0.057931														0.090842							0.452006	0.522804		0.039
																								0.457992		0.0915
																										0.072
																										0.0842
																										0.086188
																										0.0595
																										0.070692
																										0.046
																										0.092333
																										0.041125
																										0.03925
																										0.059417
																										0.061
																										0.12375
																										0.106182
																										0.060625
																										0.043833
																										0.060091
																										0.074
																										0.0865
																										0.071617
																										0.0425
																										0.094524
																										0.09663
																										0.07225
																										0.065846
																8.346			3.329
																22.53			4.68
																24.315			10.662
																1.592			11.434
																1.399			9.118
																2.171			14.473
																2.268			1.882
																10.324			1.206
																3.425			2.075
																4.921			7.381
																30.25			11.675
																18.285			5.114
																15.969			7.285
																11.193			1.399
																9.987			11.145
																2.702			10.469
																11.579			10.566
																2.026			7.14
																16.837			4.439
																16.789			2.846
																2.991			4.342
																8.974			8.829
																2.123			4.246
																0.772			1.206
																3.039			1.833
																2.557			2.075
																8.298			0.531
																8.395			2.75
																1.64			0.868
																13.074			2.605
																1.592			7.333
																3.667			0.868
																6.754			0.82
																20.552			0.965
																5.982			0.579
																2.412			3.86
																1.351			0.917
																1.544			1.399
																12.351			0.724
																6.513			1.64
																10.662			2.557
																28.127			1.737
																0.579			3.329
																12.785			5.403
																1.351			13.46
																0.82			0.724
																10.614			1.351
																3.039			2.026
																3.956			8.298
																6.706			0.724
																2.123			1.351
																10.903			2.46
																10.759			0.531
																11.723			1.254
																14.377			0.917
																7.092			1.206
																3.811			0.579
																1.833			3.715
																0.724			2.075
																1.061			0.724
																8.829			12.881
																1.592			15.969
																1.061			1.833
																4.246			0.772
																10.324			3.425
																5.259			4.149
																1.833			1.93
																9.745			4.487
																6.031			1.303
																1.93			0.82
																5.789			0.482
																13.316			0.338
																2.026			0.675
																1.11			1.303
																2.991			1.785
																3.57			8.346
																17.706			11.193
																1.689			5.355
																7.237			5.596
																4.583			7.96
																3.088			0.965
																11.096			0.917
																0.82			0.868
																3.281			0.482
																15.149			1.206
																1.013			2.316
																1.592			3.908
																3.618			7.188
																11.145			3.039
																5.403			3.956
																1.158			2.605
																4.921			2.171
																2.075			3.329
																4.294			1.496
																15.197			18.864
																10.662			1.496
																4.149			1.689
																0.917			2.412
																7.43			10.855
																2.268			4.632
																2.991			2.895
																1.93			0.048
																1.303			2.46
																8.25			5.645
																27.065			9.408
																4.342			2.75
																4.342			3.329
																5.838			2.557
																24.798			2.123
																6.851			1.447
																5.596			1.496
																4.294			3.184
																2.895			1.882
																12.158			3.329
																2.026			2.075
																5.741			4.101
																6.803			7.333
																8.877			1.061
																14.715			6.368
																4.921			2.026
																1.882			1.882
																6.031			0.724
																5.982			1.11
																12.061			8.153
																11.338			3.281
																2.268			3.136
																4.053			3.136
																8.25			2.75
																1.399			0.724
																4.294			1.158
																5.162			4.149
																4.101			2.026
																1.833			1.978
																10.469			1.496
																7.526			6.224
																16.307			4.583
																1.544			1.013
																0.917			2.943
																4.101			5.596
																3.039			2.364
																1.592			1.303
																8.781			3.329
																1.158			1.93
																7.623			5.452
																1.978			4.101
																12.978			2.026
																8.636			1.447
																3.136			1.11
																3.088			1.254
																10.614			5.548
																4.053			1.399
																2.268			2.171
																0.627			2.123
																7.478			2.412
																17.32			22.965
																14.087			5.789
																6.175			18.864
																0.917			1.544
																8.105			7.188
																2.316			3.039
																2.653			1.544
																4.535			6.899
																0.82			4.246
																2.991			3.618
																3.908			0.965
																1.496			0.965
																4.101			0.724
																0.531			1.351
																4.39			2.895
																1.254			7.333
																1.64			1.64
																1.254			5.838
																11.965			5.403
																2.509			8.974
																1.689			8.25
																3.667			6.368
																1.592			2.509
																2.557			9.022
																1.206			1.785
																4.39			3.377
																17.754			3.281
																1.737			5.114
																32.903			6.803
																5.066			2.364
																2.846			3.715
																5.066			6.899
																8.925			1.833
																10.469			20.697
																10.71			1.158
																1.061			12.785
																0.965			1.254
																14.859			2.798
																3.667			4.004
																6.899			4.728
																7.381			15.39
																16.403			8.588
																7.237			2.653
																3.715			1.544
																1.689			7.623
																1.303			18.478
																9.504			2.943
																1.785			10.807
																2.605			2.702
																3.377			0.965
																8.732			9.118
																8.153			13.653
																2.268			4.294
																2.46			6.947
																10.373			0.675
																2.123			0.531
																11.531			1.93
																5.693			3.425
																4.197			1.013
																1.689			5.017
																2.702			8.105
																2.943			5.066
																1.158			4.004
																7.526			3.86
																2.846			3.281
																4.246			5.355
																17.706			1.833
																5.307			7.188
																1.013			7.044
																8.732			18.719
																3.232			1.496
																5.355			6.224
																4.583			9.359
																6.368			1.206
																10.324			3.618
																5.693			10.083
																15.824			9.697
																5.114			2.316
																13.026			5.017
																0.868			1.496
																12.881			3.088
																3.039			0.579
																8.974			0.675
																1.158			1.689
																9.359			2.364
																15.921			7.14
																11.868			2.46
																9.601			2.895
																9.842			2.991
																12.351			2.846
																10.662			0.579
																1.64			4.294
																6.61			2.75
																6.079			3.088
																			9.601
																			2.171
																			2.75
																			1.399
																			2.798
																			6.031
																			4.39
																			1.592
																			1.399
																			2.316
																			2.702
																			2.268
																			1.689
																			1.399
																			9.215
																			4.776
																			4.246
																			1.689
																			1.882
																			3.715
																			3.763
																			7.526
																			7.285
																			1.93
																			3.136
																			2.026
																			4.101
																			7.381
																			2.702
																			2.412
																			7.285
																			1.399
																			2.605
																			1.158
																			1.351
																			7.719
																			7.478
																			12.351
																			3.232
																			1.785
																			17.32
																			6.224
																			5.21
																			1.882
																			9.215
																			3.088
																			10.566
																			10.903
																			2.075
																			8.443
																			2.268
																			4.342
																			9.215
																			8.974
																			1.158
																			1.013
																			9.311
																			3.522
																			7.574
																			3.281
																			12.592
																			1.592
																			2.412
																			10.035
																			6.224
																			1.785
																			2.026
																			7.864
																			6.899
																			3.232
																			3.57
																			3.667
																			4.487
																			4.246
																			8.395
																			2.991
																			2.605
																			4.487
																			0.965
																			0.675
																			1.496
																			1.544
																			1.689
																			0.917
																			3.474
																			1.93
																			4.342
																			7.478
																			2.846
																			1.158
																			1.882
																			1.544
																			8.974
																			1.496
																			3.232
																			3.715
																			3.281
																			1.303
																			7.14
																			3.86
																			3.377
																			5.741
																			4.101
																			5.452
																			9.215
																			1.544
																			4.101
																			1.013
																			1.592
																			2.75
																			1.061
																			0.675
																			0.675
																			1.544
																			4.004
																			2.316
																			7.671
																			1.013
																			1.978
																			0.965
																			1.206
																			1.882
																			1.496
																			1.93
																			2.026
																			3.57
																			1.399
																			1.978
																			5.548
																			0.724
																			3.956
																			3.136
																			2.798
																			1.785
																			3.184
																			5.307
																			7.285
																			2.557
																			7.623
																			20.215
																			2.268
																			0.917
																			2.557
																			0
																			1.254
																			16.837
																			4.873
																			2.991
																			1.93
																			5.452
																			1.882
																			6.32
																			6.417
																			1.737
																			8.009
																			1.013
																			4.149
																			4.149
																			9.745
																			11.096
																			5.982
																			3.715
																			3.57
																			5.307
																			4.246
																			5.017
																			10.566
																			2.316
																			5.162
																			2.268
																			3.667
																			2.605
																			1.833
																			4.873
																			2.123
																			8.974
																			13.316
																			1.206
																			9.794
																			9.745
																			6.465
																			0.531
																			1.303
																			0.965
																			0.868
																			11.868
																			4.583
																			1.254
																			2.171
																			2.846
																			1.061
																			1.303
																			1.11
																			2.316
																			3.232
																			7.767
																			0.338
																			2.316
																			4.342
																			7.092
																			3.039
																			3.088
																			1.061
																			3.088
																			1.206
																			2.557
																			2.026
																			1.592
																			4.342
																			0.965
																			0.772
																			1.882
																			7.14
																			2.46
																			1.11
																			1.544
																			0.772
																			1.64
																			2.605
																			1.978
																			2.46
																			2.702
																			10.373
																			2.412
																			2.316
																			1.061
																			2.605
																			3.715
																			4.632
																			0.675
																			0.772
																			0.82
																			2.943
																			1.013
																			6.272
																			2.509
																			1.399
																			13.798
																			2.075
																			5.017
																			3.667
																			2.123
																			9.601
																			1.447
																			1.254
																			1.978
																			2.219
																			3.281
																			1.158
																			1.206
																			2.509
																			2.268
																			2.991
																			0.965
																			4.632
																			0.193
																			5.162
																			1.254
																			0.675
																			1.061
																			0.627
																			0.868
																			2.46
																			2.895
																			3.329
																			2.605
																			4.969
																			5.355
																			4.68
																			2.316
																			10.421
																			1.544
																			1.351
																			3.184
																			18.14
																			3.908
																			2.605
																			5.5
																			6.658
																			8.684
																			0.965
																			1.737
																			0.772
																			0.965
																			0.82
																			2.846
																			11.338
																			5.21
																			10.083
																			2.702
																			2.364
																			1.061
																			2.846
																			0.627
																			4.053
																			16.789
																			18.671
																			1.64
																			2.46
																			2.798
																			3.522
																			1.882
																			3.232
																			0.724
																			1.544
																			4.149
																			3.57
																			2.895
																			1.544
																			1.399
																			1.351
																			5.21
																			10.566
																			5.114
																			11.241
																			6.031
																			1.689
																			2.846
																			7.092
																			1.254
																			5.838
																			4.439
																			2.702
																			4.728
																			0.724
																			12.302
																			1.254
																			0.386
																			11.096
																			19.153
																			3.232
																			2.075
																			3.184
																			1.544
																			3.667
																			1.544
																			2.702
																			1.206
																			2.943
																			3.811
																			3.908
																			1.93
																			1.592
																			1.303
																			1.64
																			2.846
																			0.82
																			0.868
																			4.776
																			1.882
																			1.206
																			1.496
																			5.21
																			1.254
																			0.82
																			0.724
																			1.447
																			1.592
																			1.689
																			2.412
																			4.921
																			4.39
																			1.399
																			1.351
																			0.772
																			1.254
																			3.232
																			1.447
																			7.767
																			0.772
																			1.785
																			3.86
																			8.491
																			11.338
																			1.158
																			2.943
																			17.513
																			8.636
																			12.544
																			11.338
																			1.93
																			0.531
																			3.377
																			4.439
																			19.877
																			2.798
																			3.956
																			2.846
																			7.816
																			1.785
																			12.399
																			1.833
																			3.136
																			2.846
																			3.136
																			4.728
																			2.075
																			0.579
																			10.566
																			3.474
																			3.136
																			0.772
																			2.798
																			0.724
																			3.232
																			5.307
																			2.605
																			1.882
																			1.496
																			3.763
																			0.965
																			9.745
																			1.351
																			4.487
																			1.544
																			2.46
																			5.982
																			1.399
																			3.715
																			2.509
																			3.039
																			6.513
																			3.136
																			2.895
																			2.316
																			2.943
																			3.763
																			1.689
																			1.061
																			5.982
																			1.303
																			11.289
																			3.329
																			2.364
																			20.697
																			4.632
																			4.439
																			2.364
																			3.86
																			1.013
																			3.088
																			1.447
																			2.412
																			1.254
																			3.57
																			13.364
																			0.917
																			5.645
																			1.592
																			21.035
																			18.574
																			0.675
																			0.579
																			2.46
																			2.991
																			6.465
																			1.11
																			2.412
																			1.785
																			0.724
																			1.303
																			5.017
																			12.158
																			8.925
																			2.46
																			2.268
																			1.11
																			3.232
																			7.381
																			8.25
																			2.557
																			1.544
																			4.004
																			6.031
																			3.57
																			1.882
																			1.689
																			0.627
																			2.895
																			0.724
																			0.579
																			3.618
																			1.11
																			3.039
																			2.268
																			1.206
