# Supplementary material for: A positive feedback loop between Flower and PI(4,5)P2 at periactive zones controls bulk endocytosis in Drosophila
Source: eLife. 2020 Dec 10;9:e60125. doi: 10.7554/eLife.60125 (PMC7748424; doi:10.7554/eLife.60125)
Supplement: Figure 2—figure supplement 1—source data 1. [file elife-60125-fig2-figsupp1-data1.xlsx]

## Sheet: 工作表1
Figure 2-figure supplement 1 Panel b (Normalized whole-bouton PLCδ1-PH-EGFP level)
25 °C	29 °C
1.06486	2.25833
0.710394	1.73348
0.941644	1.94246
0.930462	1.94835
0.808544	2.03877
0.959718	2.03681
1.37851	1.92187
0.997823	2.67536
1.06235	2.08839
1.15467	1.67899
0.798175
0.727885
1.26202
1.20294
