# Supplementary material for: A positive feedback loop between Flower and PI(4,5)P2 at periactive zones controls bulk endocytosis in Drosophila
Source: eLife. 2020 Dec 10;9:e60125. doi: 10.7554/eLife.60125 (PMC7748424; doi:10.7554/eLife.60125)
Supplement: Figure 2—figure supplement 2—source data 1. [file elife-60125-fig2-figsupp2-data1.xlsx]

## Sheet: 工作表1
Figure 2-figure supplement 2 (Area of bulk endosome (> 80 nm)/Bouton area)
Control (At rest)	Control (High K+)	Control (10-min recovery)	Control (20-min recovery)	PLCδ1-PH-EGFP(Mild level)(At rest)	PLCδ1-PH-EGFP(Mild level)(High K+)	PLCδ1-PH-EGFP(Mild level)(10-min recovery)	PLCδ1-PH-EGFP(Mild level)(20-min recovery)	PLCδ1-PHS39R-EGFP(High level)(At rest)	PLCδ1-PHS39R-EGFP(High level)(High K+)	PLCδ1-PHS39R-EGFP(High level)(20-min recovery)	Synj (Mild level)(At rest)	Synj (Mild level)(High K+)	Synj (Mild level)(10-min recovery)	Synj (Mild level)(20-min recovery)
0	0	0	0	0	0	0	0	0	0	0	0	0.00822489	0	0
0	0	0	0	0	0	0	0	0	0.00700922	0	0	0.0106966	0	0.0101545
0	0	0	0	0	0	0	0	0	0.0200894	0	0	0.0128017	0.0102379	0.0103122
0	0	0	0.00197873	0	0	0	0.00795179	0	0.0265003	0	0	0.0151447	0.0106406	0.0113652
0	0.0146949	0	0.00924923	0	0	0	0.00807618	0	0.0315383	0	0	0.0151753	0.0175464	0.0217618
0	0.0162235	0	0.00974101	0	0	0	0.00943838	0	0.0341143	0	0.00155333	0.0219502	0.0203848	0.0218624
0	0.0376004	0.0080054	0.0103543	0	0	0	0.00973085	0	0.0360974	0	0.0052548	0.0227951	0.0210757	0.0250617
0	0.0439696	0.00808007	0.0119157	0	0.00461075	0.00289729	0.0140196	0	0.0411613	0	0.00569845	0.0300565	0.0220484	0.030417
0.00114755	0.0448478	0.00837211	0.0135389	0.00114254	0.0056357	0.0084203	0.0144064	0	0.0464871	0	0.00748332	0.0326226	0.022783	0.0308394
0.00150055	0.0462836	0.00931827	0.0136414	0.00164576	0.00836112	0.00986005	0.0157036	0	0.0486691	0	0.0106897	0.0356805	0.0236777	0.0496632
0.00238373	0.0467837	0.0105266	0.0139159	0.00412311	0.00962912	0.0114353	0.0165817	0.000649239	0.0504406	0	0.0136456	0.0437	0.0239194	0.0525077
0.0142154	0.0535903	0.0166302	0.0155444	0.00469791	0.0139975	0.0209331	0.0251581	0.00184777	0.0539792	0	0.0138582	0.0439299	0.0292805	0.0791276
0.0146719	0.0703536	0.0178493	0.0164445	0.00477127	0.017336	0.0237812	0.0271383	0.00274272	0.0540224	0	0.0214645	0.0566677	0.0381795	0.0816469
0.0156072	0.0753205	0.0189741	0.0168596	0.0073902	0.0298887	0.0249343	0.0316259	0.00305923	0.065165	0	0.0223432	0.064053	0.0490441	0.0940687
0.0227829	0.121614	0.0271623	0.0222412	0.00886354	0.030296	0.0270694	0.0320704	0.00326545	0.0676955	0	0.0273896	0.0694071	0.0537006	0.101172
0.0262343	0.134919	0.0287403	0.0516274	0.0312169	0.0451488	0.0365779	0.0337287	0.00367717	0.0707854	0	0.0275141	0.0738515	0.0594994	0.120312
	0.141502	0.0408144	0.0606093		0.0564226	0.0369842	0.0500623	0.00369932	0.0812872	0		0.0773885	0.0598932	0.142058
	0.149439	0.0562789	0.06143		0.0600808	0.0382909		0.00535066	0.084284	0		0.107791	0.0762303	0.161817
	0.161818	0.0563315	0.113143		0.0607584	0.0455136		0.00885632	0.084355	0		0.112041	0.0918243	0.187185
	0.181592				0.0767943	0.058175		0.0115243	0.0920022	0.00376702		0.277341	0.0967401	0.194445
	0.217515				0.0842328	0.0706887		0.0121968	0.0972991	0.00817006			0.117564
					0.191938	0.0874891		0.0125469	0.122681	0.00958449			0.119671
								0.0191798	0.124832	0.0101613			0.140578
								0.0393272	0.129643	0.01218			0.167192
								0.0653228	0.159242	0.016813
									0.201492	0.0168931
									0.29404	0.0170005
										0.0186697
										0.0256691
										0.0279731
										0.0309704
										0.0341187
										0.0378571
										0.0399761
										0.0405346
										0.0414151
										0.0425288
										0.0432793
										0.0513378
										0.0540804
										0.0546659
										0.0645827
										0.065802
										0.0658475
										0.0679003
										0.0941028
										0.103753
										0.133695
8.346
22.53
24.315
1.592
1.399
2.171
2.268
10.324
3.425
4.921
30.25
18.285
15.969
11.193
9.987
2.702
11.579
2.026
16.837
16.789
2.991
8.974
2.123
0.772
3.039
2.557
8.298
8.395
1.64
13.074
1.592
3.667
6.754
20.552
5.982
2.412
1.351
1.544
12.351
6.513
10.662
28.127
0.579
12.785
1.351
0.82
10.614
3.039
3.956
6.706
2.123
10.903
10.759
11.723
14.377
7.092
3.811
1.833
0.724
1.061
8.829
1.592
1.061
4.246
10.324
5.259
1.833
9.745
6.031
1.93
5.789
13.316
2.026
1.11
2.991
3.57
17.706
1.689
7.237
4.583
3.088
11.096
0.82
3.281
15.149
1.013
1.592
3.618
11.145
5.403
1.158
4.921
2.075
4.294
15.197
10.662
4.149
0.917
7.43
2.268
2.991
1.93
1.303
8.25
27.065
4.342
4.342
5.838
24.798
6.851
5.596
4.294
2.895
12.158
2.026
5.741
6.803
8.877
14.715
4.921
1.882
6.031
5.982
12.061
11.338
2.268
4.053
8.25
1.399
4.294
5.162
4.101
1.833
10.469
7.526
16.307
1.544
0.917
4.101
3.039
1.592
8.781
1.158
7.623
1.978
12.978
8.636
3.136
3.088
10.614
4.053
2.268
0.627
7.478
17.32
14.087
6.175
0.917
8.105
2.316
2.653
4.535
0.82
2.991
3.908
1.496
4.101
0.531
4.39
1.254
1.64
1.254
11.965
2.509
1.689
3.667
1.592
2.557
1.206
4.39
17.754
1.737
32.903
5.066
2.846
5.066
8.925
10.469
10.71
1.061
0.965
14.859
3.667
6.899
7.381
16.403
7.237
3.715
1.689
1.303
9.504
1.785
2.605
3.377
8.732
8.153
2.268
2.46
10.373
2.123
11.531
5.693
4.197
1.689
2.702
2.943
1.158
7.526
2.846
4.246
17.706
5.307
1.013
8.732
3.232
5.355
4.583
6.368
10.324
5.693
15.824
5.114
13.026
0.868
12.881
3.039
8.974
1.158
9.359
15.921
11.868
9.601
9.842
12.351
10.662
1.64
6.61
6.079
