# Supplementary material for: A positive feedback loop between Flower and PI(4,5)P2 at periactive zones controls bulk endocytosis in Drosophila
Source: eLife. 2020 Dec 10;9:e60125. doi: 10.7554/eLife.60125 (PMC7748424; doi:10.7554/eLife.60125)
Supplement: Figure 2—source data 1. [file elife-60125-fig2-data1.xlsx]

## Sheet: 工作表1
Figure 2 Panel b (Normalized PM-associated PLCδ1-PH-EGFP level)					Figure 2 Panel d (Bulk endosome (> 80 nm)/µm2)
Control (At rest)	Control (High K+)	Synj (At rest)	Synj (High K+)		Control (At rest)	Control (High K+)	Control (10-min recovery)	Control (20-min recovery)	PLCδ1-PH-EGFP(Mild level)(At rest)	PLCδ1-PH-EGFP(Mild level)(High K+)	PLCδ1-PH-EGFP(Mild level)(10-min recovery)	PLCδ1-PH-EGFP(Mild level)(20-min recovery)	PLCδ1-PH-EGFP(High level)(High K+)	PLCδ1-PHS39R-EGFP(High level)(At rest)	PLCδ1-PHS39R-EGFP(High level)(High K+)	PLCδ1-PHS39R-EGFP(High level)(20-min recovery)	Synj (Mild level)(At rest)	Synj (Mild level)(High K+)	Synj (Mild level)(10-min recovery)	Synj (Mild level)(20-min recovery)	Synj (High level)(High K+)
0.641237	0.848649	0.39837	0.652842		0	0	0	0	0	0	0	0	0	0	0	0	0	0	0	0	0
0.70462	1.16785	0.518102	0.727204		0	0	0	0	0	0	0	1.21074	0	0	1.13634	0	0.478271	0	0	0	0.308821
0.829994	1.20253	0.553383	0.735948		0	0	0	0	0	0	0	1.57026	0	0	1.60243	0	0.503292	0	0	0.74689	0.463626
0.863525	1.45093	0.70286	0.778359		0	1.31525	0	0.236843	0	0	0	1.63845	0	0	2.01727	0	0.568269	0	0.657319	0.788865	0.534976
0.902995	1.539	0.759521	0.786621		0	1.71706	0	0.387022	0	0.261584	0	1.73057	0	0	2.38096	0	0.57277	1.1856	1.477	1.28821	0.725777
0.921164	1.64556	0.776251	0.842269		0	1.83334	0	0.765971	0	0.912057	0.492298	1.76283	0	0	2.5968	0	0.727681	1.33972	1.53023	1.4184	0.856014
0.934175	1.67291	0.810446	0.94631		0	2.13094	0.644568	0.785337	0	0.942612	1.0227	1.91535	0	0	2.65616	0	0.881923	1.4515	1.61744	1.4729	0.929436
1.04091	1.77397	0.92864	0.996154		0	4.10655	0.883203	0.792946	0	1.04687	1.10747	2.29553	0.42491	0	3.31671	0	0.93193	1.5301	1.66419	1.73239	1.38966
1.04306	1.92841	0.954024	1.02659		0.138614	4.97986	0.963815	1.02849	0.161067	1.20694	1.22381	2.43903	0.76118	0	3.5796	0	0.941391	1.61764	1.70326	2.23263	1.50854
1.08469	2.09155	0.984768	1.03262		0.219834	5.3762	1.01001	1.11894	0.181769	1.46078	2.54977	2.50334	0.791661	0	4.11653	0	1.17168	1.82048	1.73585	2.69098	2.72696
1.37561	2.24796	1.01824	1.15903		0.272346	5.81419	1.14452	1.35199	0.340131	1.72507	2.77294	2.68491	1.10776	0.125739	4.19744	0	1.21746	2.246	2.03377	4.08202	5.92047
1.65802			1.44861		0.281122	6.27263	1.64005	1.40039	0.431909	1.81243	3.07303	2.90797	1.24188	0.246787	4.19931	0	1.33442	2.3317	2.60679	4.89164	5.97641
					1.13431	6.39428	1.83896	1.87409	0.512954	1.92713	3.15909	4.05785	1.52134	0.36291	4.24824	0	1.41081	3.23864	3.02073	5.54555
					2.26604	6.90751	2.70911	2.24952	0.910639	2.88074	3.44493	4.81968	1.7613	0.383856	4.35186	0	1.43084	3.51347	3.09379	5.57814
					2.88206	7.21893	2.97599	2.49955	0.966442	3.58547	3.72677	7.6905	2.18204	0.478042	4.44186	0	2.13905	4.00204	3.51618	5.79621
					3.04247	8.13253	3.26225	2.75583	1.03093	5.31986	4.53546		3.42648	0.618229	4.55244	0	3.00266	4.43135	4.23386	5.91375
						8.6023	3.56944	2.99934	1.06391	7.09856	5.04329		3.95031	0.641907	5.3927	0		4.53684	4.34383	5.92658
						8.86097	3.74024	3.21024	1.8285	7.92604	5.43107		4.17312	0.655143	5.41174	0		4.71962	4.5776	6.6486
						10.5557	4.44404	5.52432		13.3323	6.12261			0.883616	5.42274	0		5.09436	4.81008	6.67787
						11.2009					6.36759			0.904726	6.06541	0.486347		5.88556	5.15039	7.05136
														0.929058	6.49347	0.737158		6.47793	6.32073	8.30898
														1.28385	6.51346	0.881879		7.31378	6.45002	12.7372
														2.32184	6.63026	1.21718		7.59062	7.80016
														3.30115	7.88004	1.41603		20.4161	8.73269
														5.65658	8.10116	1.54836			10.2986
															10.5617	2.01603			11.7565
															13.7991	2.02337
																2.05038
																2.0853
																2.24543
																2.38959
																2.61007
																3.02185
																3.07281
																3.11078
																3.12343
																3.53602
																3.95483
																4.22281
																4.45388
																4.58127
																4.75234
																4.93653
																5.65855
																6.48761
																8.82401
																9.36227
																9.91237
					8.346
					22.53
					24.315
					1.592
					1.399
					2.171
					2.268
					10.324
					3.425
					4.921
					30.25
					18.285
					15.969
					11.193
					9.987
					2.702
					11.579
					2.026
					16.837
					16.789
					2.991
					8.974
					2.123
					0.772
					3.039
					2.557
					8.298
					8.395
					1.64
					13.074
					1.592
					3.667
					6.754
					20.552
					5.982
					2.412
					1.351
					1.544
					12.351
					6.513
					10.662
					28.127
					0.579
					12.785
					1.351
					0.82
					10.614
					3.039
					3.956
					6.706
					2.123
					10.903
					10.759
					11.723
					14.377
					7.092
					3.811
					1.833
					0.724
					1.061
					8.829
					1.592
					1.061
					4.246
					10.324
					5.259
					1.833
					9.745
					6.031
					1.93
					5.789
					13.316
					2.026
					1.11
					2.991
					3.57
					17.706
					1.689
					7.237
					4.583
					3.088
					11.096
					0.82
					3.281
					15.149
					1.013
					1.592
					3.618
					11.145
					5.403
					1.158
					4.921
					2.075
					4.294
					15.197
					10.662
					4.149
					0.917
					7.43
					2.268
					2.991
					1.93
					1.303
					8.25
					27.065
					4.342
					4.342
					5.838
					24.798
					6.851
					5.596
					4.294
					2.895
					12.158
					2.026
					5.741
					6.803
					8.877
					14.715
					4.921
					1.882
					6.031
					5.982
					12.061
					11.338
					2.268
					4.053
					8.25
					1.399
					4.294
					5.162
					4.101
					1.833
					10.469
					7.526
					16.307
					1.544
					0.917
					4.101
					3.039
					1.592
					8.781
					1.158
					7.623
					1.978
					12.978
					8.636
					3.136
					3.088
					10.614
					4.053
					2.268
					0.627
					7.478
					17.32
					14.087
					6.175
					0.917
					8.105
					2.316
					2.653
					4.535
					0.82
					2.991
					3.908
					1.496
					4.101
					0.531
					4.39
					1.254
					1.64
					1.254
					11.965
					2.509
					1.689
					3.667
					1.592
					2.557
					1.206
					4.39
					17.754
					1.737
					32.903
					5.066
					2.846
					5.066
					8.925
					10.469
					10.71
					1.061
					0.965
					14.859
					3.667
					6.899
					7.381
					16.403
					7.237
					3.715
					1.689
					1.303
					9.504
					1.785
					2.605
					3.377
					8.732
					8.153
					2.268
					2.46
					10.373
					2.123
					11.531
					5.693
					4.197
					1.689
					2.702
					2.943
					1.158
					7.526
					2.846
					4.246
					17.706
					5.307
					1.013
					8.732
					3.232
					5.355
					4.583
					6.368
					10.324
					5.693
					15.824
					5.114
					13.026
					0.868
					12.881
					3.039
					8.974
					1.158
					9.359
					15.921
					11.868
					9.601
					9.842
					12.351
					10.662
					1.64
					6.61
					6.079
