# Supplementary material for: A positive feedback loop between Flower and PI(4,5)P2 at periactive zones controls bulk endocytosis in Drosophila
Source: eLife. 2020 Dec 10;9:e60125. doi: 10.7554/eLife.60125 (PMC7748424; doi:10.7554/eLife.60125)
Supplement: Figure 3—source data 1. [file elife-60125-fig3-data1.xlsx]

## Sheet: 工作表1
Figure 3 Panel b (Normalized PLA signal)			Figure 3 Panel d (Normalized PM-associated PLCδ1-PH-EGFP level)					Figure 3 Panel f (Normalized PM-associated PLCδ1-PH-EGFP level)					Figure 3 Panel h (Normalized PM-associated PLCδ1-PH-EGFP level)									Figure 3 Panel j (Normalized evoked Ca2+ level)
At rest	High K+		Control (At rest)	Control (High K+)	fwe-/-(At rest)	fwe-/- (High K+)		Fwe[WT] rescue (At rest)	Fwe[WT] rescue (High K+)	Fwe[E79Q] rescue (At rest)	Fwe[E79Q] rescue (High K+)		Control (At rest)	Control (High K+)	canA1 RNAi (JF) (At rest)	canA1 RNAi (JF) (High K+)	Control (At rest)	Control (High K+)	canA1 RNAi (FB) (At rest)	canA1 RNAi (FB) (High K+)		Control	fwe-/-	canA1 RNAi (JF)	canA1 RNAi (FB)	Synj	PLCδ1-PH	PLCδ1-PH fwe-/-
0.133567	0.261895		1.46054	2.17698	1.6494	1.52343		0.83697	1.4061	1.0832	1.06298		0.448273	0.723646	0.422677	0.56733	0.43391	1.21396	0.779397	0.701239		0.692919	0.349757	0.387031	0.342182	0.234777	0.426338	0.318491
0.413949	0.293087		0.782001	2.53089	0.815891	1.43273		0.851994	1.41309	1.31307	1.06387		0.604845	1.02642	0.468698	0.61434	0.842319	1.22962	0.781906	0.866637		0.985471	0.383964	0.43277	0.536529	0.329595	0.435185	0.391117
0.417548	0.890883		1.08534	3.80375	1.8874	1.64132		0.895856	1.56972	1.35522	1.19352		0.76301	1.08905	0.469488	0.624401	0.950995	1.27799	0.824002	0.922055		0.804972	0.447966	0.473005	0.611043	0.381367	0.480462	0.394579
0.631508	0.996342		1.61241	2.41213	1.98133	1.26289		0.921556	1.73425	1.36017	1.36587		0.770208	1.29786	0.728194	0.863618	0.997862	1.40113	0.847491	1.02194		1.19524	0.463421	0.866344	0.620723	0.428792	0.491646	0.421667
0.858107	1.01042		1.70472	4.45956	1.43483	2.04564		0.997434	1.85831	1.37466	1.38624		0.820325	1.46484	0.850549	1.03784	1.06693	1.43052	0.867274	1.03441		1.38651	0.482032	1.06869	0.708047	0.445114	0.597699	0.477361
0.895162	1.31556		0.653017	2.18205	2.01999	1.51354		1.00212	1.91316	1.38311	1.42711		0.966418	1.6728	0.917009	1.07534	1.10498	1.49406	0.939756	1.10172		0.676543	0.488844	0.784262	0.766192	0.495615	0.733577	0.514665
0.922052	1.55365		0.509748	2.0804	1.73435	1.95767		1.03958	2.35895	1.3874	1.69978		1.15072	1.81711	1.21329	1.1728	1.10515	1.5464	0.94965	1.17247		1.31937	0.699594	0.853882	0.802367	0.501527	0.774797	0.550692
1.2227	2.08561		1.17595	3.19741	1.12997	1.34069		1.04662	2.52156	1.43641	1.74328		1.17629	2.28813	1.58244	1.21644	1.1234	1.60625	1.03755	1.18886		0.830397	0.79548	0.795722	0.865448	0.587099	0.791026	0.577771
1.25147	2.75089		0.611192	2.38888	1.00976	1.09102		1.16551		1.45222	1.85858		1.28137	3.10506	1.63933	1.55336	1.14518	1.63751	1.1078	1.18944		0.960573		0.546103	0.918017	0.732068	0.812851	0.663792
1.4973	3.91484		0.405074	3.04145	1.05149	1.31561		1.24237		1.47493			1.29254				1.22928	1.64161		1.20602		1.148		0.811648		0.747113	0.840635
1.62382	4.39082			3.20498	1.10607	2.30857							1.3029					1.66319		1.29514						0.766204	0.866772
2.13282	5.61617				1.28348	2.91531							1.4231					1.76301		1.31691							1.16262
	5.63773					0.276759
						2.47976
			8.346			3.329
			22.53			4.68
			24.315			10.662
			1.592			11.434
			1.399			9.118
			2.171			14.473
			2.268			1.882
			10.324			1.206
			3.425			2.075
			4.921			7.381
			30.25			11.675
			18.285			5.114
			15.969			7.285
			11.193			1.399
			9.987			11.145
			2.702			10.469
			11.579			10.566
			2.026			7.14
			16.837			4.439
			16.789			2.846
			2.991			4.342
			8.974			8.829
			2.123			4.246
			0.772			1.206
			3.039			1.833
			2.557			2.075
			8.298			0.531
			8.395			2.75
			1.64			0.868
			13.074			2.605
			1.592			7.333
			3.667			0.868
			6.754			0.82
			20.552			0.965
			5.982			0.579
			2.412			3.86
			1.351			0.917
			1.544			1.399
			12.351			0.724
			6.513			1.64
			10.662			2.557
			28.127			1.737
			0.579			3.329
			12.785			5.403
			1.351			13.46
			0.82			0.724
			10.614			1.351
			3.039			2.026
			3.956			8.298
			6.706			0.724
			2.123			1.351
			10.903			2.46
			10.759			0.531
			11.723			1.254
			14.377			0.917
			7.092			1.206
			3.811			0.579
			1.833			3.715
			0.724			2.075
			1.061			0.724
			8.829			12.881
			1.592			15.969
			1.061			1.833
			4.246			0.772
			10.324			3.425
			5.259			4.149
			1.833			1.93
			9.745			4.487
			6.031			1.303
			1.93			0.82
			5.789			0.482
			13.316			0.338
			2.026			0.675
			1.11			1.303
			2.991			1.785
			3.57			8.346
			17.706			11.193
			1.689			5.355
			7.237			5.596
			4.583			7.96
			3.088			0.965
			11.096			0.917
			0.82			0.868
			3.281			0.482
			15.149			1.206
			1.013			2.316
			1.592			3.908
			3.618			7.188
			11.145			3.039
			5.403			3.956
			1.158			2.605
			4.921			2.171
			2.075			3.329
			4.294			1.496
			15.197			18.864
			10.662			1.496
			4.149			1.689
			0.917			2.412
			7.43			10.855
			2.268			4.632
			2.991			2.895
			1.93			0.048
			1.303			2.46
			8.25			5.645
			27.065			9.408
			4.342			2.75
			4.342			3.329
			5.838			2.557
			24.798			2.123
			6.851			1.447
			5.596			1.496
			4.294			3.184
			2.895			1.882
			12.158			3.329
			2.026			2.075
			5.741			4.101
			6.803			7.333
			8.877			1.061
			14.715			6.368
			4.921			2.026
			1.882			1.882
			6.031			0.724
			5.982			1.11
			12.061			8.153
			11.338			3.281
			2.268			3.136
			4.053			3.136
			8.25			2.75
			1.399			0.724
			4.294			1.158
			5.162			4.149
			4.101			2.026
			1.833			1.978
			10.469			1.496
			7.526			6.224
			16.307			4.583
			1.544			1.013
			0.917			2.943
			4.101			5.596
			3.039			2.364
			1.592			1.303
			8.781			3.329
			1.158			1.93
			7.623			5.452
			1.978			4.101
			12.978			2.026
			8.636			1.447
			3.136			1.11
			3.088			1.254
			10.614			5.548
			4.053			1.399
			2.268			2.171
			0.627			2.123
			7.478			2.412
			17.32			22.965
			14.087			5.789
			6.175			18.864
			0.917			1.544
			8.105			7.188
			2.316			3.039
			2.653			1.544
			4.535			6.899
			0.82			4.246
			2.991			3.618
			3.908			0.965
			1.496			0.965
			4.101			0.724
			0.531			1.351
			4.39			2.895
			1.254			7.333
			1.64			1.64
			1.254			5.838
			11.965			5.403
			2.509			8.974
			1.689			8.25
			3.667			6.368
			1.592			2.509
			2.557			9.022
			1.206			1.785
			4.39			3.377
			17.754			3.281
			1.737			5.114
			32.903			6.803
			5.066			2.364
			2.846			3.715
			5.066			6.899
			8.925			1.833
			10.469			20.697
			10.71			1.158
			1.061			12.785
			0.965			1.254
			14.859			2.798
			3.667			4.004
			6.899			4.728
			7.381			15.39
			16.403			8.588
			7.237			2.653
			3.715			1.544
			1.689			7.623
			1.303			18.478
			9.504			2.943
			1.785			10.807
			2.605			2.702
			3.377			0.965
			8.732			9.118
			8.153			13.653
			2.268			4.294
			2.46			6.947
			10.373			0.675
			2.123			0.531
			11.531			1.93
			5.693			3.425
			4.197			1.013
			1.689			5.017
			2.702			8.105
			2.943			5.066
			1.158			4.004
			7.526			3.86
			2.846			3.281
			4.246			5.355
			17.706			1.833
			5.307			7.188
			1.013			7.044
			8.732			18.719
			3.232			1.496
			5.355			6.224
			4.583			9.359
			6.368			1.206
			10.324			3.618
			5.693			10.083
			15.824			9.697
			5.114			2.316
			13.026			5.017
			0.868			1.496
			12.881			3.088
			3.039			0.579
			8.974			0.675
			1.158			1.689
			9.359			2.364
			15.921			7.14
			11.868			2.46
			9.601			2.895
			9.842			2.991
			12.351			2.846
			10.662			0.579
			1.64			4.294
			6.61			2.75
			6.079			3.088
						9.601
						2.171
						2.75
						1.399
						2.798
						6.031
						4.39
						1.592
						1.399
						2.316
						2.702
						2.268
						1.689
						1.399
						9.215
						4.776
						4.246
						1.689
						1.882
						3.715
						3.763
						7.526
						7.285
						1.93
						3.136
						2.026
						4.101
						7.381
						2.702
						2.412
						7.285
						1.399
						2.605
						1.158
						1.351
						7.719
						7.478
						12.351
						3.232
						1.785
						17.32
						6.224
						5.21
						1.882
						9.215
						3.088
						10.566
						10.903
						2.075
						8.443
						2.268
						4.342
						9.215
						8.974
						1.158
						1.013
						9.311
						3.522
						7.574
						3.281
						12.592
						1.592
						2.412
						10.035
						6.224
						1.785
						2.026
						7.864
						6.899
						3.232
						3.57
						3.667
						4.487
						4.246
						8.395
						2.991
						2.605
						4.487
						0.965
						0.675
						1.496
						1.544
						1.689
						0.917
						3.474
						1.93
						4.342
						7.478
						2.846
						1.158
						1.882
						1.544
						8.974
						1.496
						3.232
						3.715
						3.281
						1.303
						7.14
						3.86
						3.377
						5.741
						4.101
						5.452
						9.215
						1.544
						4.101
						1.013
						1.592
						2.75
						1.061
						0.675
						0.675
						1.544
						4.004
						2.316
						7.671
						1.013
						1.978
						0.965
						1.206
						1.882
						1.496
						1.93
						2.026
						3.57
						1.399
						1.978
						5.548
						0.724
						3.956
						3.136
						2.798
						1.785
						3.184
						5.307
						7.285
						2.557
						7.623
						20.215
						2.268
						0.917
						2.557
						0
						1.254
						16.837
						4.873
						2.991
						1.93
						5.452
						1.882
						6.32
						6.417
						1.737
						8.009
						1.013
						4.149
						4.149
						9.745
						11.096
						5.982
						3.715
						3.57
						5.307
						4.246
						5.017
						10.566
						2.316
						5.162
						2.268
						3.667
						2.605
						1.833
						4.873
						2.123
						8.974
						13.316
						1.206
						9.794
						9.745
						6.465
						0.531
						1.303
						0.965
						0.868
						11.868
						4.583
						1.254
						2.171
						2.846
						1.061
						1.303
						1.11
						2.316
						3.232
						7.767
						0.338
						2.316
						4.342
						7.092
						3.039
						3.088
						1.061
						3.088
						1.206
						2.557
						2.026
						1.592
						4.342
						0.965
						0.772
						1.882
						7.14
						2.46
						1.11
						1.544
						0.772
						1.64
						2.605
						1.978
						2.46
						2.702
						10.373
						2.412
						2.316
						1.061
						2.605
						3.715
						4.632
						0.675
						0.772
						0.82
						2.943
						1.013
						6.272
						2.509
						1.399
						13.798
						2.075
						5.017
						3.667
						2.123
						9.601
						1.447
						1.254
						1.978
						2.219
						3.281
						1.158
						1.206
						2.509
						2.268
						2.991
						0.965
						4.632
						0.193
						5.162
						1.254
						0.675
						1.061
						0.627
						0.868
						2.46
						2.895
						3.329
						2.605
						4.969
						5.355
						4.68
						2.316
						10.421
						1.544
						1.351
						3.184
						18.14
						3.908
						2.605
						5.5
						6.658
						8.684
						0.965
						1.737
						0.772
						0.965
						0.82
						2.846
						11.338
						5.21
						10.083
						2.702
						2.364
						1.061
						2.846
						0.627
						4.053
						16.789
						18.671
						1.64
						2.46
						2.798
						3.522
						1.882
						3.232
						0.724
						1.544
						4.149
						3.57
						2.895
						1.544
						1.399
						1.351
						5.21
						10.566
						5.114
						11.241
						6.031
						1.689
						2.846
						7.092
						1.254
						5.838
						4.439
						2.702
						4.728
						0.724
						12.302
						1.254
						0.386
						11.096
						19.153
						3.232
						2.075
						3.184
						1.544
						3.667
						1.544
						2.702
						1.206
						2.943
						3.811
						3.908
						1.93
						1.592
						1.303
						1.64
						2.846
						0.82
						0.868
						4.776
						1.882
						1.206
						1.496
						5.21
						1.254
						0.82
						0.724
						1.447
						1.592
						1.689
						2.412
						4.921
						4.39
						1.399
						1.351
						0.772
						1.254
						3.232
						1.447
						7.767
						0.772
						1.785
						3.86
						8.491
						11.338
						1.158
						2.943
						17.513
						8.636
						12.544
						11.338
						1.93
						0.531
						3.377
						4.439
						19.877
						2.798
						3.956
						2.846
						7.816
						1.785
						12.399
						1.833
						3.136
						2.846
						3.136
						4.728
						2.075
						0.579
						10.566
						3.474
						3.136
						0.772
						2.798
						0.724
						3.232
						5.307
						2.605
						1.882
						1.496
						3.763
						0.965
						9.745
						1.351
						4.487
						1.544
						2.46
						5.982
						1.399
						3.715
						2.509
						3.039
						6.513
						3.136
						2.895
						2.316
						2.943
						3.763
						1.689
						1.061
						5.982
						1.303
						11.289
						3.329
						2.364
						20.697
						4.632
						4.439
						2.364
						3.86
						1.013
						3.088
						1.447
						2.412
						1.254
						3.57
						13.364
						0.917
						5.645
						1.592
						21.035
						18.574
						0.675
						0.579
						2.46
						2.991
						6.465
						1.11
						2.412
						1.785
						0.724
						1.303
						5.017
						12.158
						8.925
						2.46
						2.268
						1.11
						3.232
						7.381
						8.25
						2.557
						1.544
						4.004
						6.031
						3.57
						1.882
						1.689
						0.627
						2.895
						0.724
						0.579
						3.618
						1.11
						3.039
						2.268
						1.206
