# Supplementary material for: A positive feedback loop between Flower and PI(4,5)P2 at periactive zones controls bulk endocytosis in Drosophila
Source: eLife. 2020 Dec 10;9:e60125. doi: 10.7554/eLife.60125 (PMC7748424; doi:10.7554/eLife.60125)
Supplement: Figure 4—figure supplement 1—source data 1. [file elife-60125-fig4-figsupp1-data1.xlsx]

## Sheet: 工作表1
Figure 4-figure supplement 1 Panel b (Normalized Fwe transgenic expression level)			Figure 4-figure supplement 1 Panel d (Normalized evoked Ca2+ level)				Figure 4-figure supplement 1 Panel f (Normalized PM-associated PLCδ1-PH-EGFP level)					Figure 4-figure supplement 1 Panel h (Bulk endosome (> 80 nm)/µm2)
Fwe[WT] Rescue	Fwe[K146A/147A/R150A] Rescue		fwe-/-	Fwe[WT] Rescue	Fwe[K146A/147A/R150A] Rescue		Fwe[WT] Rescue (At rest)	Fwe[WT] Rescue (High K+)	Fwe[K146A/147A/R150A] Rescue (At rest)	Fwe[K146A/147A/R150A] Rescue (High K+)		Fwe[WT] Rescue (At rest)	Fwe[WT] Rescue (High K+)	Fwe[K146A/147A/R150A] Rescue (At rest)	Fwe[K146A/147A/R150A] Rescue (High K+)
0.687027	1.0206		0.393608	0.923845	1.18721		0.455799	1.05936	0.128606	0.556874		0	0	0	0
0.922846	1.26997		0.422296	0.960109	1.04582		0.729663	1.06831	0.410067	0.793084		0	1.57433	0	0.581388
0.725696	0.572216		0.933786	1.00527	0.81629		0.818357	1.21788	0.493977	0.85886		0	1.80619	0	1.02043
0.906098	1.05465		0.389381	0.952905	0.936215		0.82519	1.25238	0.624025	0.876686		0	2.49436	0	1.8744
0.581973	0.625326		0.68604	1.36457	1.00017		0.887519	1.51735	0.693018	0.892298		0	2.62005	0	2.07936
0.536271	2.16068		1.27872	0.984197	1.01967		0.92672	1.64237	0.744508	0.998296		0	2.71061	0	2.14289
0.633303	1.57752		0.667371	1.04967	1.18686		0.957244	1.77964	0.763778	1.03563		0	3.16097	0.13771	2.68649
2.30386	1.692		0.781173	1.12055	1.28137		1.10749	1.81145	0.934504	1.07732		0	3.28114	0.216821	3.31049
1.47472	1.08797		0.609571	0.856212	0.829707		1.18137	2.21794	0.957321	1.2074		0	5.51691	0.353773	3.94648
1.2282	2.55804		0.487915	0.782667	1.45479		1.31696	2.24253	1.06819	1.30061		0	5.79596	0.373692	4.1141
			0.607057				1.38774		1.10783	1.36699		0	5.82143	0.552781	4.36113
			0.300292				1.40594		1.22842	1.6007		0	8.10414	1.00519	5.52445
			0.641473							1.64071		0	10.1159	2.01488	5.65795
			0.598483							2.27729		0	11.2509	2.29702	6.26337
			0.666703							2.61789		0		3.50867	8.83685
												0		5.98771	9.48294
												0
												0.80096
												0.877991
												1.02832
												1.07312
												1.26926
												1.575
												1.72142
												2.73829
												2.96785
												3.48911
												5.84864
			8.346
			22.53
			24.315
			1.592
			1.399
			2.171
			2.268
			10.324
			3.425
			4.921
			30.25
			18.285
			15.969
			11.193
			9.987
			2.702
			11.579
			2.026
			16.837
			16.789
			2.991
			8.974
			2.123
			0.772
			3.039
			2.557
			8.298
			8.395
			1.64
			13.074
			1.592
			3.667
			6.754
			20.552
			5.982
			2.412
			1.351
			1.544
			12.351
			6.513
			10.662
			28.127
			0.579
			12.785
			1.351
			0.82
			10.614
			3.039
			3.956
			6.706
			2.123
			10.903
			10.759
			11.723
			14.377
			7.092
			3.811
			1.833
			0.724
			1.061
			8.829
			1.592
			1.061
			4.246
			10.324
			5.259
			1.833
			9.745
			6.031
			1.93
			5.789
			13.316
			2.026
			1.11
			2.991
			3.57
			17.706
			1.689
			7.237
			4.583
			3.088
			11.096
			0.82
			3.281
			15.149
			1.013
			1.592
			3.618
			11.145
			5.403
			1.158
			4.921
			2.075
			4.294
			15.197
			10.662
			4.149
			0.917
			7.43
			2.268
			2.991
			1.93
			1.303
			8.25
			27.065
			4.342
			4.342
			5.838
			24.798
			6.851
			5.596
			4.294
			2.895
			12.158
			2.026
			5.741
			6.803
			8.877
			14.715
			4.921
			1.882
			6.031
			5.982
			12.061
			11.338
			2.268
			4.053
			8.25
			1.399
			4.294
			5.162
			4.101
			1.833
			10.469
			7.526
			16.307
			1.544
			0.917
			4.101
			3.039
			1.592
			8.781
			1.158
			7.623
			1.978
			12.978
			8.636
			3.136
			3.088
			10.614
			4.053
			2.268
			0.627
			7.478
			17.32
			14.087
			6.175
			0.917
			8.105
			2.316
			2.653
			4.535
			0.82
			2.991
			3.908
			1.496
			4.101
			0.531
			4.39
			1.254
			1.64
			1.254
			11.965
			2.509
			1.689
			3.667
			1.592
			2.557
			1.206
			4.39
			17.754
			1.737
			32.903
			5.066
			2.846
			5.066
			8.925
			10.469
			10.71
			1.061
			0.965
			14.859
			3.667
			6.899
			7.381
			16.403
			7.237
			3.715
			1.689
			1.303
			9.504
			1.785
			2.605
			3.377
			8.732
			8.153
			2.268
			2.46
			10.373
			2.123
			11.531
			5.693
			4.197
			1.689
			2.702
			2.943
			1.158
			7.526
			2.846
			4.246
			17.706
			5.307
			1.013
			8.732
			3.232
			5.355
			4.583
			6.368
			10.324
			5.693
			15.824
			5.114
			13.026
			0.868
			12.881
			3.039
			8.974
			1.158
			9.359
			15.921
			11.868
			9.601
			9.842
			12.351
			10.662
			1.64
			6.61
			6.079
