# Supplementary material for: A positive feedback loop between Flower and PI(4,5)P2 at periactive zones controls bulk endocytosis in Drosophila
Source: eLife. 2020 Dec 10;9:e60125. doi: 10.7554/eLife.60125 (PMC7748424; doi:10.7554/eLife.60125)
Supplement: Figure 4—figure supplement 2—source data 1. [file elife-60125-fig4-figsupp2-data1.xlsx]

## Sheet: 工作表1
Figure 4-figure supplement 2 Panel b (Normalized Fwe transgenic expression level)
Fwe[WT] Rescue	Fwe[K29A/R33A] Rescue
0.552101	1.58264
0.546083	1.27105
1.37587	1.13287
0.849938	1.15085
1.73979	0.430438
0.979964	1.31653
0.842015	0.904018
1.11423	1.82953
	0.426717
	1.19627
