# Supplementary material for: A positive feedback loop between Flower and PI(4,5)P2 at periactive zones controls bulk endocytosis in Drosophila
Source: eLife. 2020 Dec 10;9:e60125. doi: 10.7554/eLife.60125 (PMC7748424; doi:10.7554/eLife.60125)
Supplement: Figure 4—source data 1. [file elife-60125-fig4-data1.xlsx]

## Sheet: 工作表1
Figure 4 Panel b (Normalized BRET signal)							Figure 4 Panel c (PI(4,5)P2 binding (%))				Figure 4 Panel e (Normalized evoked Ca2+ level)				Figure 4 Panel g (Normalized PM-associated PLCδ1-PH-EGFP level)
Fwe[WT]	Fwe[WT](Excess PIP2)	WT	[N/M/C]>A	[M/C]>A	[N]>A		All	M/C	N		fwe-/-	Fwe[WT] Rescue	Fwe[K29A/R33A] Rescue		Fwe[WT] Rescue (At rest)	Fwe[WT] Rescue (High K+)	Fwe[K29A/R33A] Rescue (At rest)	Fwe[K29A/R33A] Rescue (High K+)
0.912937	0.324825	0.95548	0.668723	0.904814	0.868648		109.216	33.7896	79.6641		0.443369	0.696279	0.537247		0.79366	0.91645	0.57565	0.942884
1.04411	0.436911	0.969311	0.510685	0.800227	0.875537		110.266	39.3239	48.7027		0.501449	0.750795	0.630065		0.804872	1.85596	0.600266	1.22317
1.04295	0.455343	1.07521	0.727656	0.893385	0.926685		80.5184	37.0664	65.0592		0.545082	0.836962	0.636001		0.854908	2.00016	0.677254	1.68525
0.956645	0.56483	1.00693	0.6477	0.744901	0.911594		78.7119	22.6524	13.9075		0.596782	0.871954	0.734803		0.971222	2.57929	1.00216	1.73419
0.953233	0.593683	0.996619	0.63393	0.836425	0.876675		125.888	47.8855	46.4118		0.6094	0.895437	0.743991		0.980472	2.75144	1.00611	1.92868
1.09012	0.811335	0.996448	0.731605	0.782454	0.914926		95.3999	31.6805	49.9088		0.618535	1.0143	0.763123		1.09311	2.80527	1.3263	2.07531
											0.665467	1.07786	0.76746			3.09615	1.42249	2.08595
											0.696896	1.10248	0.802616			3.14551	1.74793	2.24018
											0.739844	1.1115	0.807741			3.75508
											0.772808	1.12294	0.82945
											0.772808	1.12503	0.838846
											0.793252	1.14198	0.859399
											0.80578	1.25248	0.875234
											0.811157		0.899996
											0.940385		1.05513
							8.346
							22.53
							24.315
							1.592
							1.399
							2.171
							2.268
							10.324
							3.425
							4.921
							30.25
							18.285
							15.969
							11.193
							9.987
							2.702
							11.579
							2.026
							16.837
							16.789
							2.991
							8.974
							2.123
							0.772
							3.039
							2.557
							8.298
							8.395
							1.64
							13.074
							1.592
							3.667
							6.754
							20.552
							5.982
							2.412
							1.351
							1.544
							12.351
							6.513
							10.662
							28.127
							0.579
							12.785
							1.351
							0.82
							10.614
							3.039
							3.956
							6.706
							2.123
							10.903
							10.759
							11.723
							14.377
							7.092
							3.811
							1.833
							0.724
							1.061
							8.829
							1.592
							1.061
							4.246
							10.324
							5.259
							1.833
							9.745
							6.031
							1.93
							5.789
							13.316
							2.026
							1.11
							2.991
							3.57
							17.706
							1.689
							7.237
							4.583
							3.088
							11.096
							0.82
							3.281
							15.149
							1.013
							1.592
							3.618
							11.145
							5.403
							1.158
							4.921
							2.075
							4.294
							15.197
							10.662
							4.149
							0.917
							7.43
							2.268
							2.991
							1.93
							1.303
							8.25
							27.065
							4.342
							4.342
							5.838
							24.798
							6.851
							5.596
							4.294
							2.895
							12.158
							2.026
							5.741
							6.803
							8.877
							14.715
							4.921
							1.882
							6.031
							5.982
							12.061
							11.338
							2.268
							4.053
							8.25
							1.399
							4.294
							5.162
							4.101
							1.833
							10.469
							7.526
							16.307
							1.544
							0.917
							4.101
							3.039
							1.592
							8.781
							1.158
							7.623
							1.978
							12.978
							8.636
							3.136
							3.088
							10.614
							4.053
							2.268
							0.627
							7.478
							17.32
							14.087
							6.175
							0.917
							8.105
							2.316
							2.653
							4.535
							0.82
							2.991
							3.908
							1.496
							4.101
							0.531
							4.39
							1.254
							1.64
							1.254
							11.965
							2.509
							1.689
							3.667
							1.592
							2.557
							1.206
							4.39
							17.754
							1.737
							32.903
							5.066
							2.846
							5.066
							8.925
							10.469
							10.71
							1.061
							0.965
							14.859
							3.667
							6.899
							7.381
							16.403
							7.237
							3.715
							1.689
							1.303
							9.504
							1.785
							2.605
							3.377
							8.732
							8.153
							2.268
							2.46
							10.373
							2.123
							11.531
							5.693
							4.197
							1.689
							2.702
							2.943
							1.158
							7.526
							2.846
							4.246
							17.706
							5.307
							1.013
							8.732
							3.232
							5.355
							4.583
							6.368
							10.324
							5.693
							15.824
							5.114
							13.026
							0.868
							12.881
							3.039
							8.974
							1.158
							9.359
							15.921
							11.868
							9.601
							9.842
							12.351
							10.662
							1.64
							6.61
							6.079
