# Supplementary material for: A positive feedback loop between Flower and PI(4,5)P2 at periactive zones controls bulk endocytosis in Drosophila
Source: eLife. 2020 Dec 10;9:e60125. doi: 10.7554/eLife.60125 (PMC7748424; doi:10.7554/eLife.60125)
Supplement: Figure 6—source data 1. [file elife-60125-fig6-data1.xlsx]

## Sheet: 工作表1
Figure 6 Panel f (DAB signal ratio (Bulk endosome to SV))
Flag-Fwe-HA	HA-Fwe-APEX2 (+ PI(4,5)P2 microdomain	HA-Fwe-APEX2 (- PI(4,5)P2 microdomain
0.917899	1.42278	1.13582
0.876823	1.28154	1.10699
0.94645	1.37901	1.18597
0.943556	1.50913	1.09636
0.892665	1.2882	1.02229
1.09334	1.4962	1.04842
1.05989	1.32257	1.24795
1.15653	1.43741	1.13014
1.09974	1.65423	0.917816
1.18311	1.38472	1.14009
1.08587	1.36894	1.11286
1.20523	1.07917	1.14586
1.01094	1.06741	0.93836
1.03677	1.09529	0.983368
1.08409	1.07717	0.936683
0.976621	1.20683	1.12838
1.13139	1.19846	1.01024
1.09618	1.07056	0.935895
0.887671	0.940207	1.11037
1.00922	1.22492	1.08867
0.973834	1.35095	0.921269
0.928995	1.18387	0.936032
0.979319	1.35096	0.809282
1.04326	1.27361	1.13138
1.03212	1.1843	1.11277
1.18961	1.16943	1.26423
1.13615	1.09102	1.07621
1.09151	1.3472	1.121
1.16453	1.30716	1.10514
1.09321	1.42418	1.16414
1.09994	1.31997	0.939657
1.21116	1.28874	1.11594
1.05055	1.20754	0.892396
	1.37304	1.01038
	1.20911	0.750733
	1.3085	1.01304
	1.09063	1.25692
	1.46386	1.14315
	1.33163	1.01047
	1.22829	1.13071
	1.44356	1.02496
	1.29613	1.05482
	1.29616	1.16871
	1.25681	1.02534
	1.3438	1.07661
	1.23038	1.19775
	1.04067	1.50545
		1.02438
		1.3796
		1.21829
		1.0785
		1.46215
		1.12308
		1.06411
		1.2449
		1.08754
		1.31623
		1.16809
		1.451
