# Supplementary figures and images for: A positive feedback loop between Flower and PI(4,5)P2 at periactive zones controls bulk endocytosis in Drosophila
Source: eLife journal article supplement (doi:10.7554/elife.60125), 2020-12-10

# Figure 1-figure supplement 1

**a**

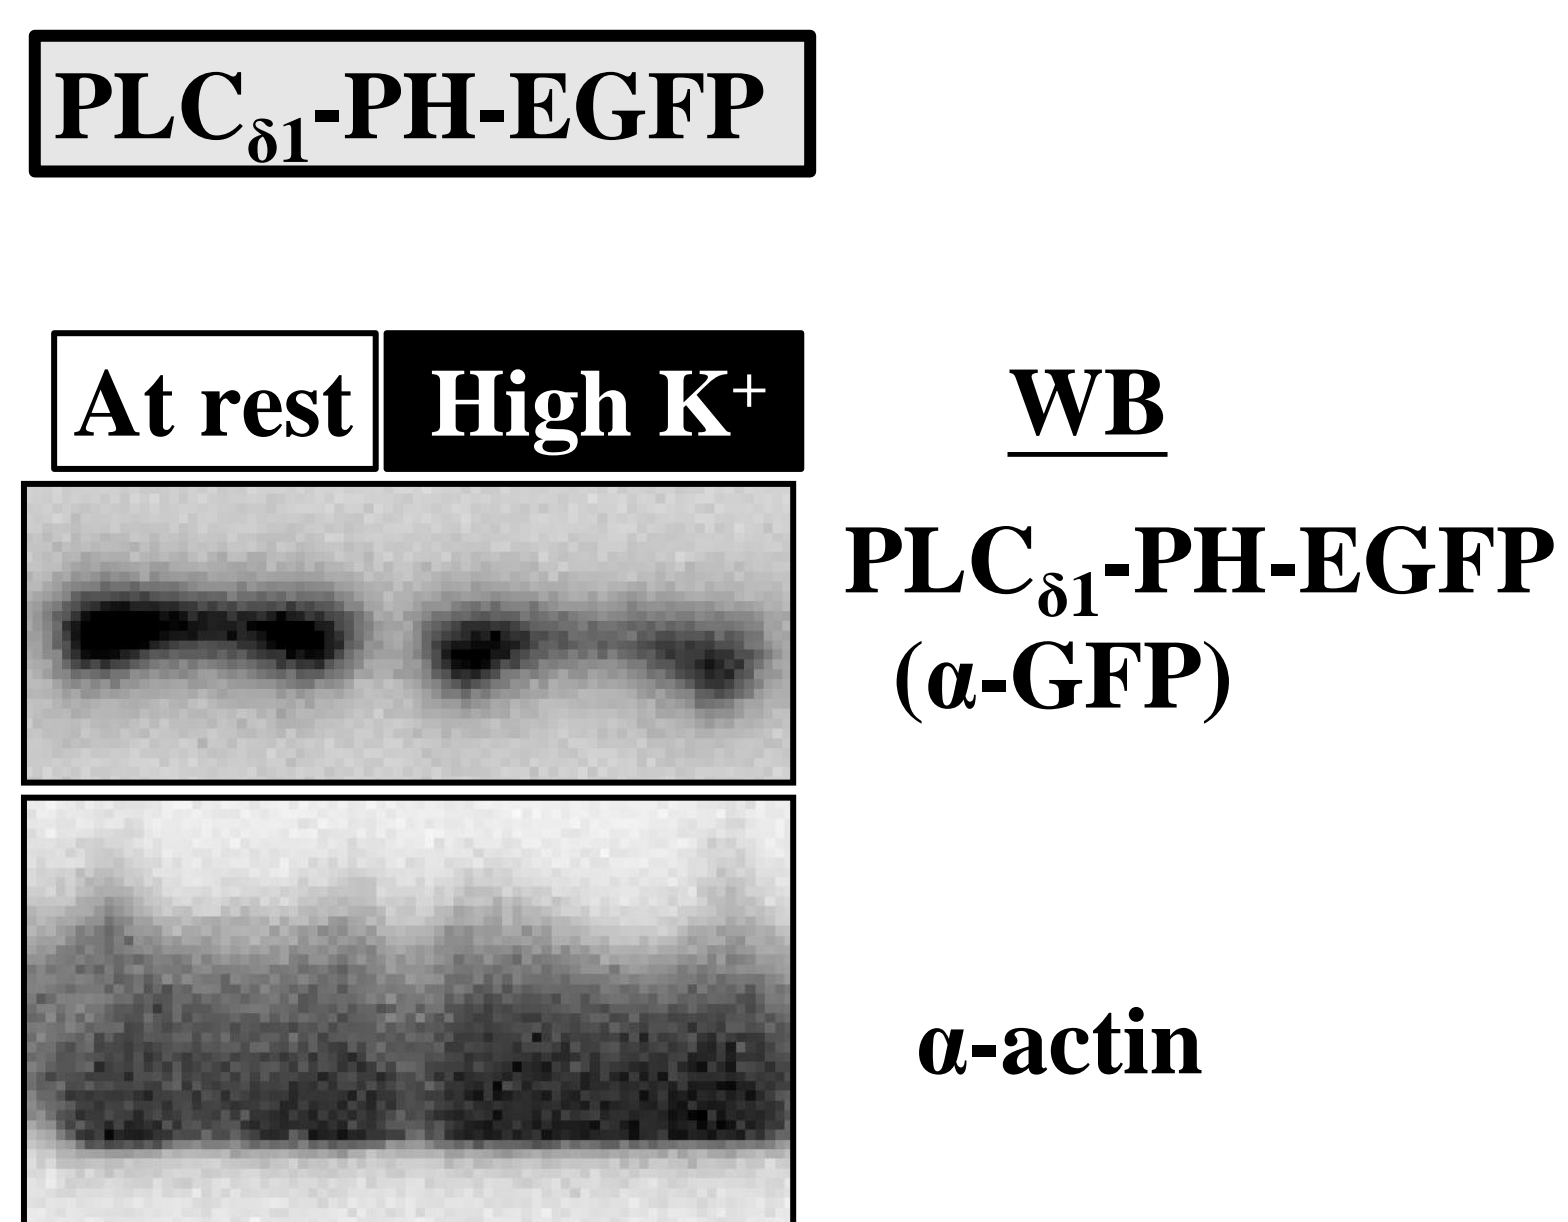

**b**

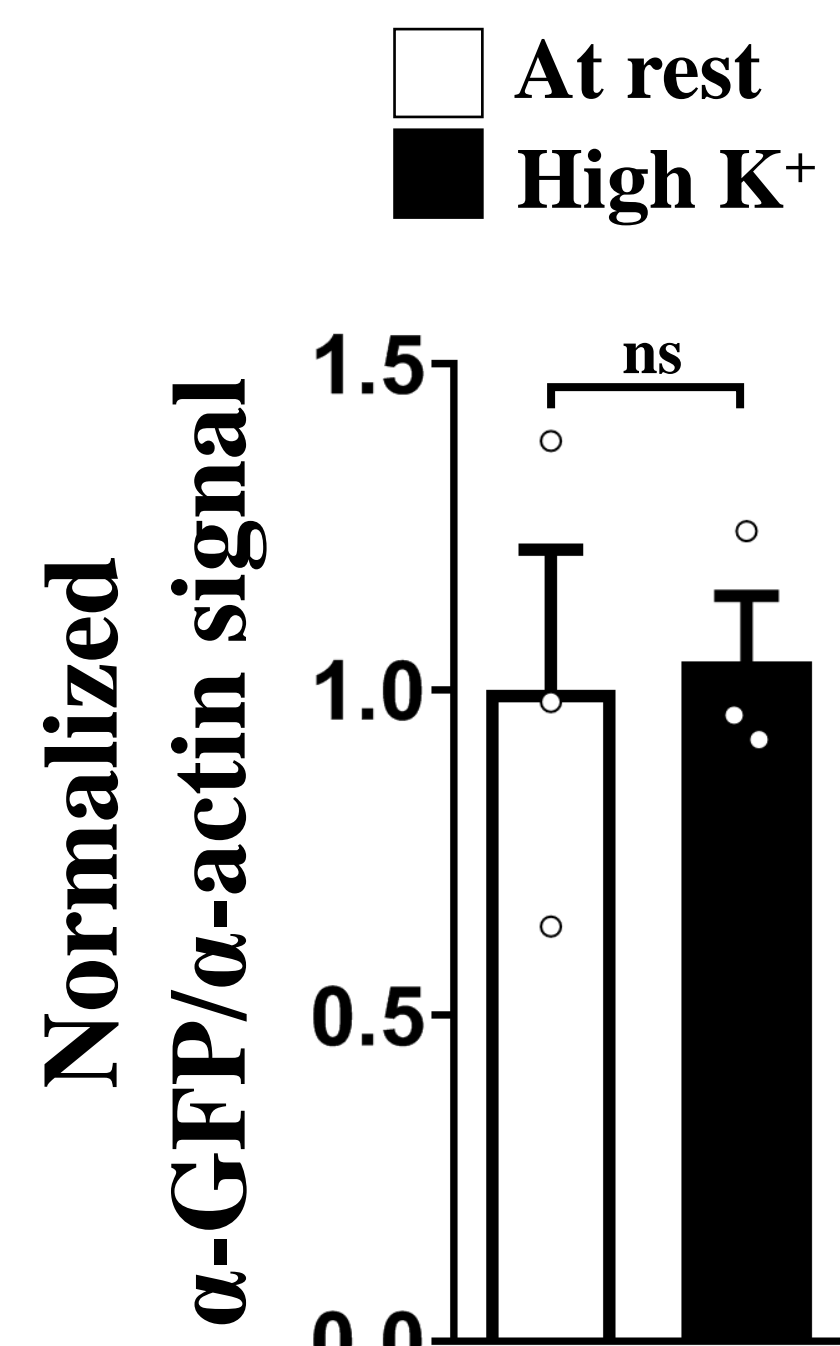

**c**

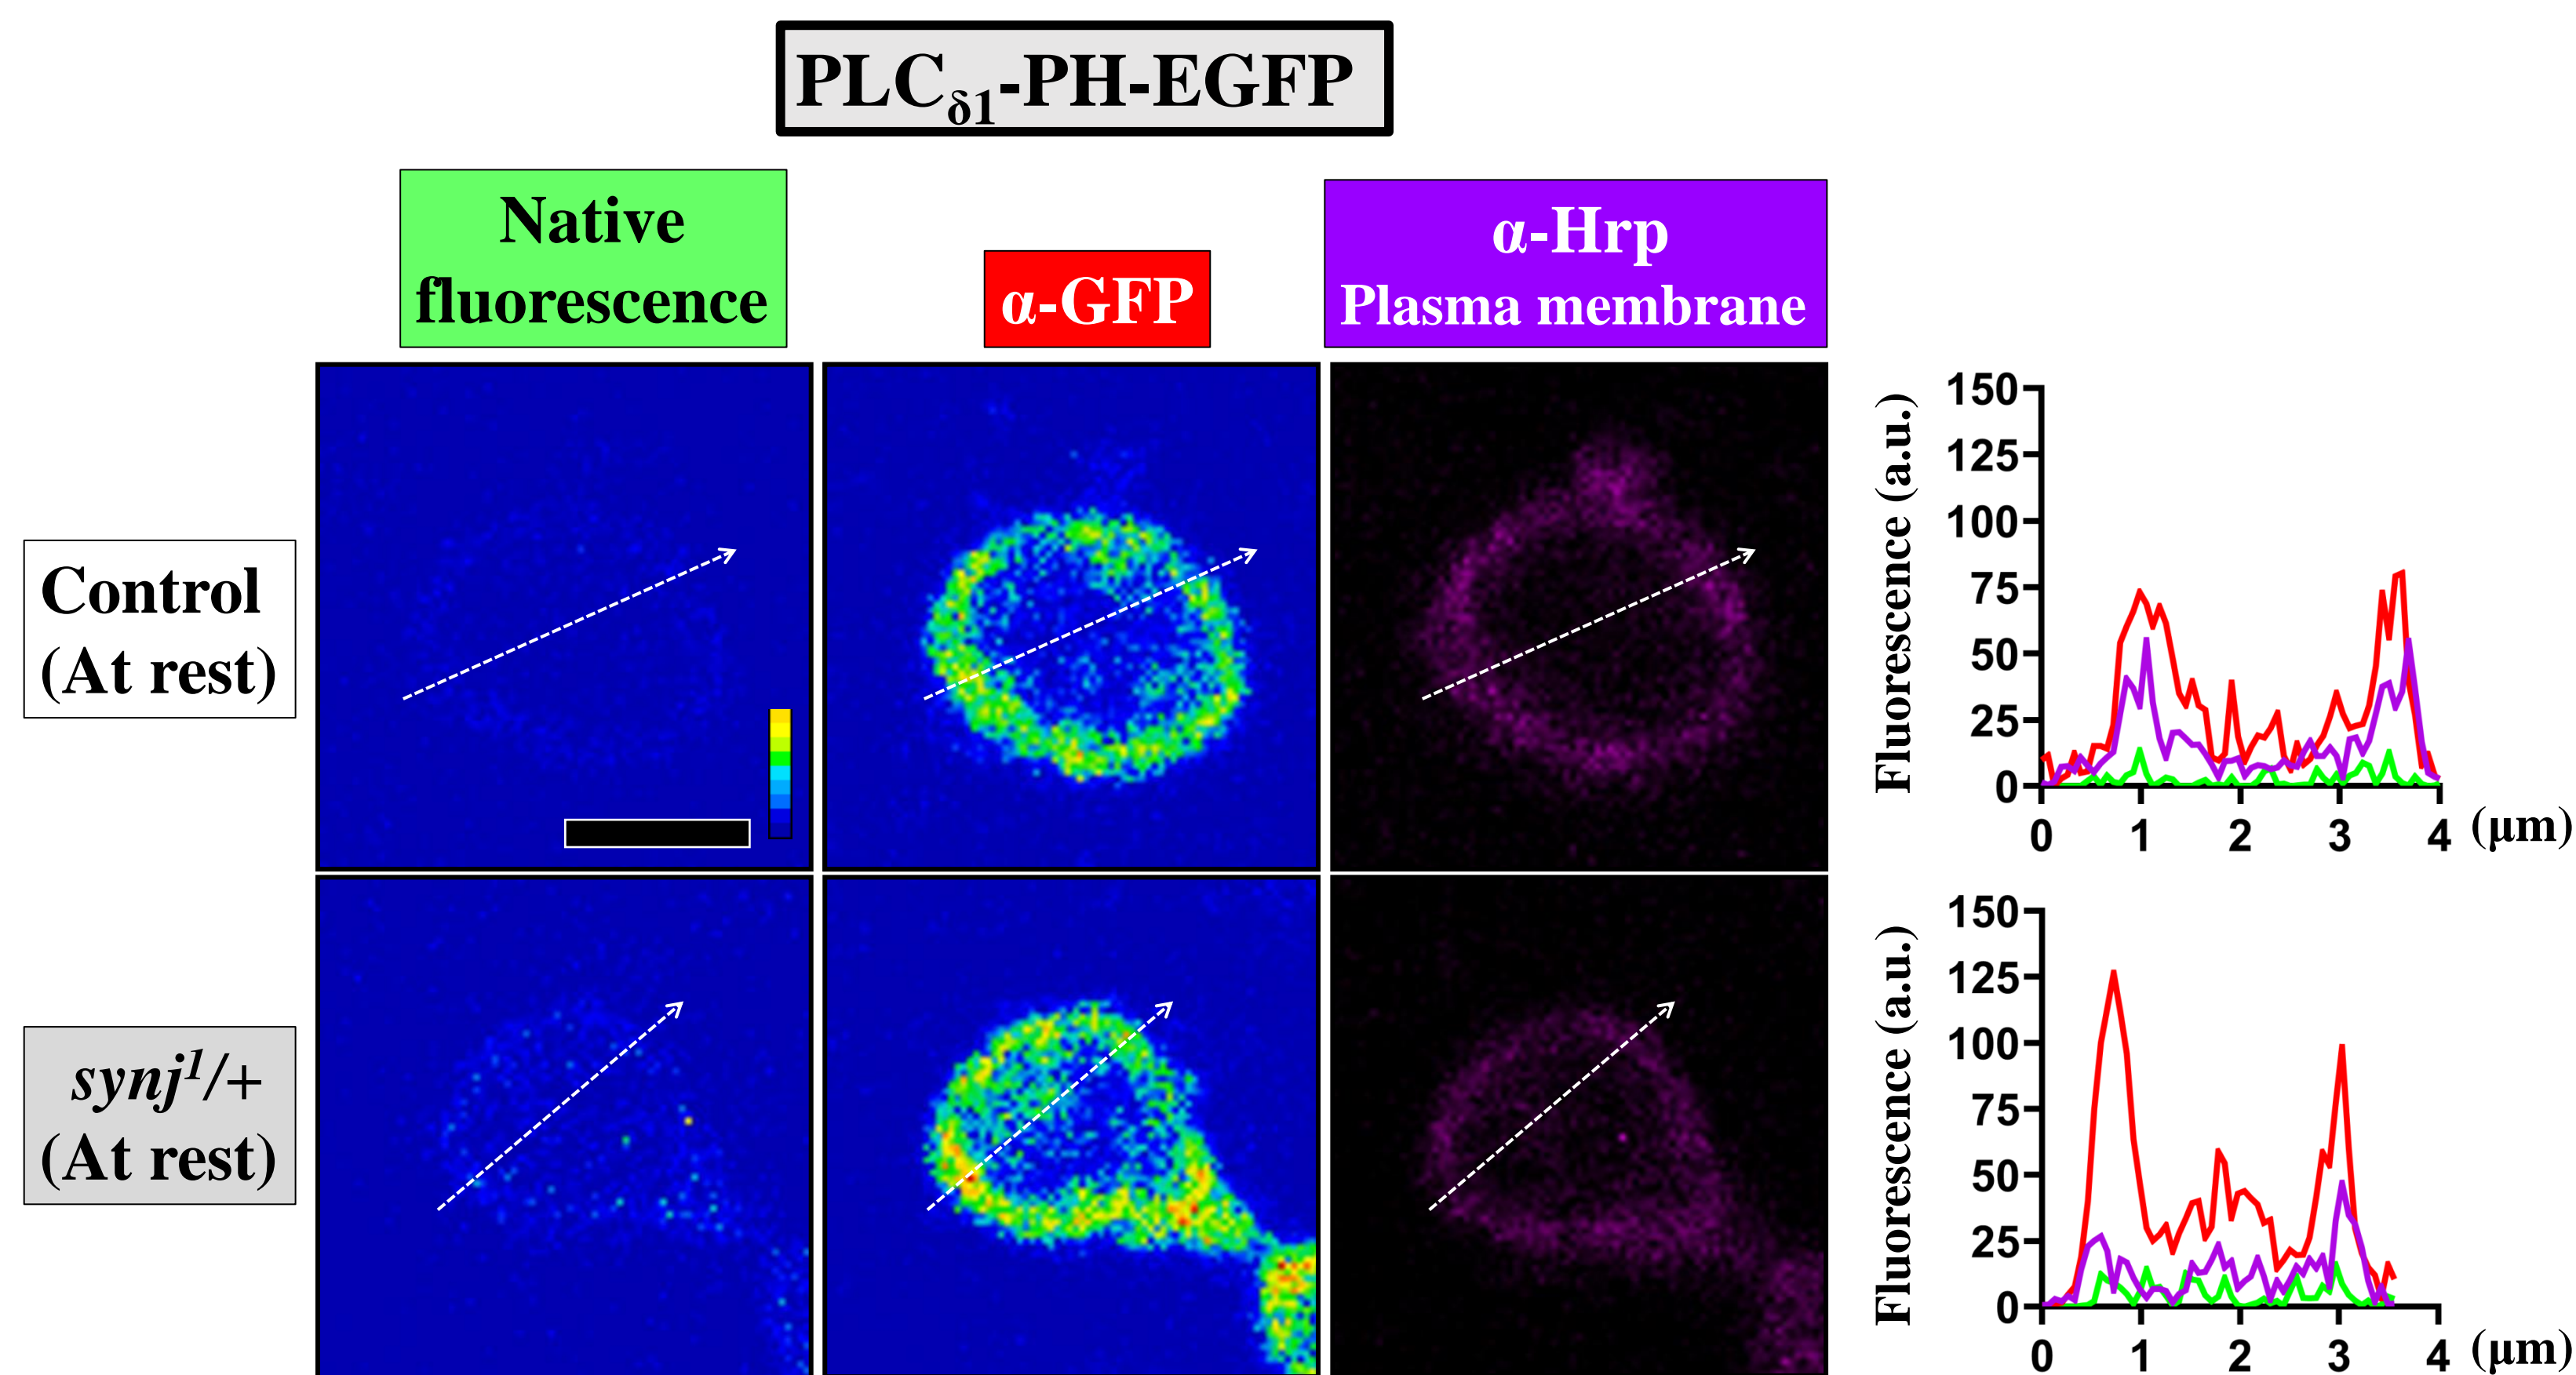

**d**

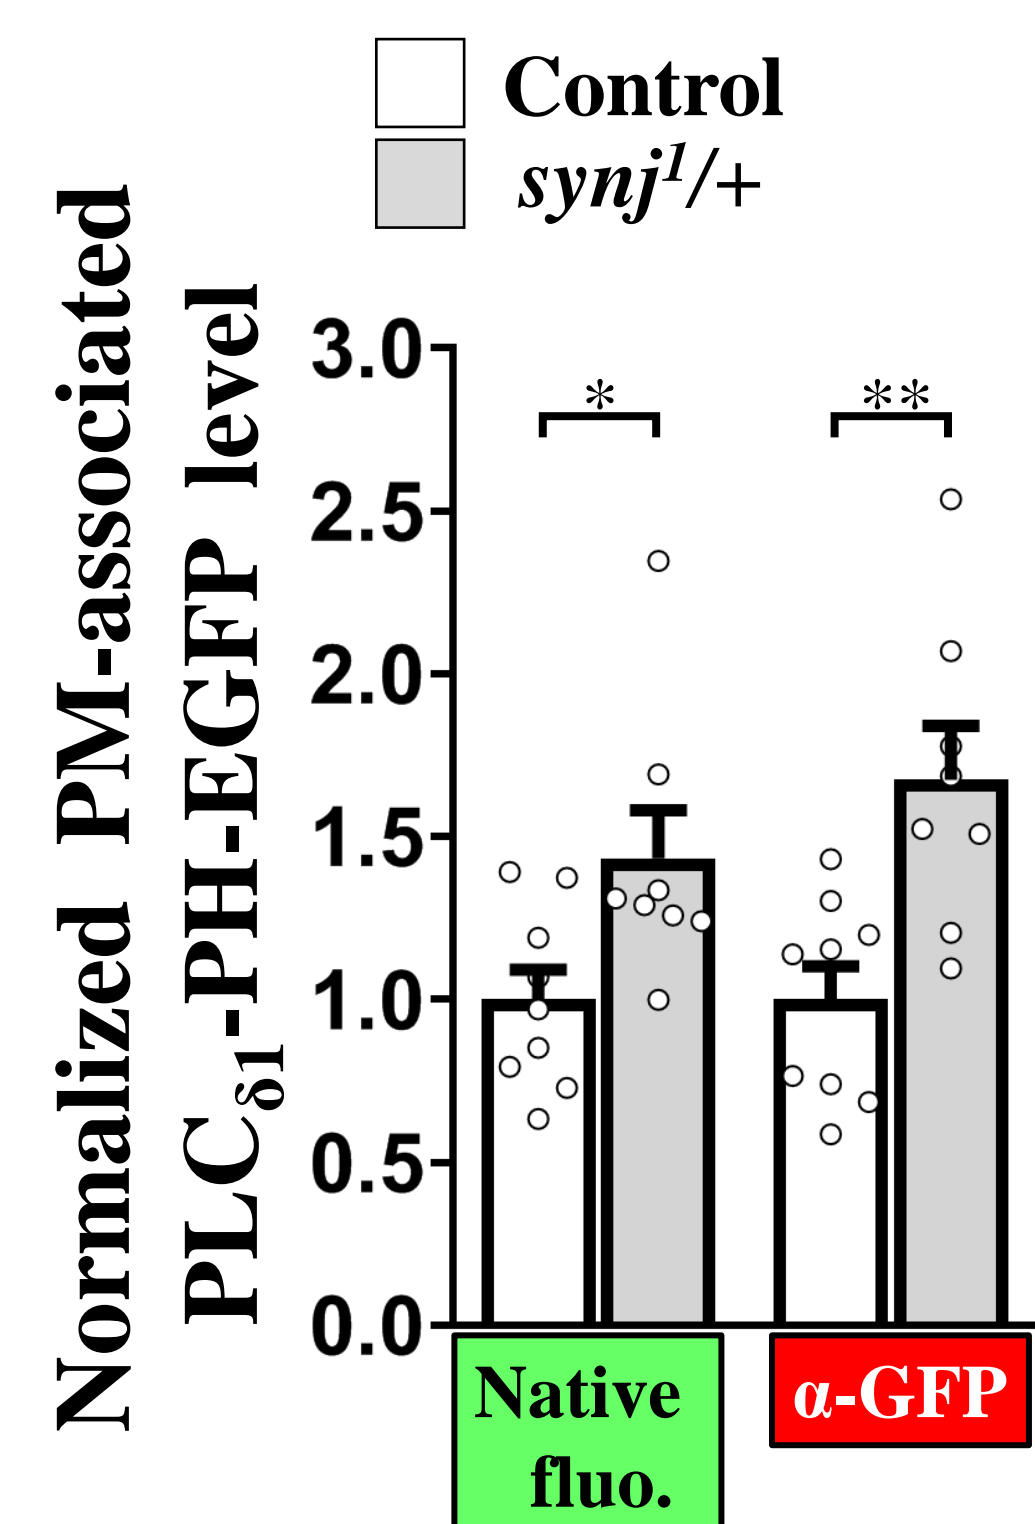

**e**

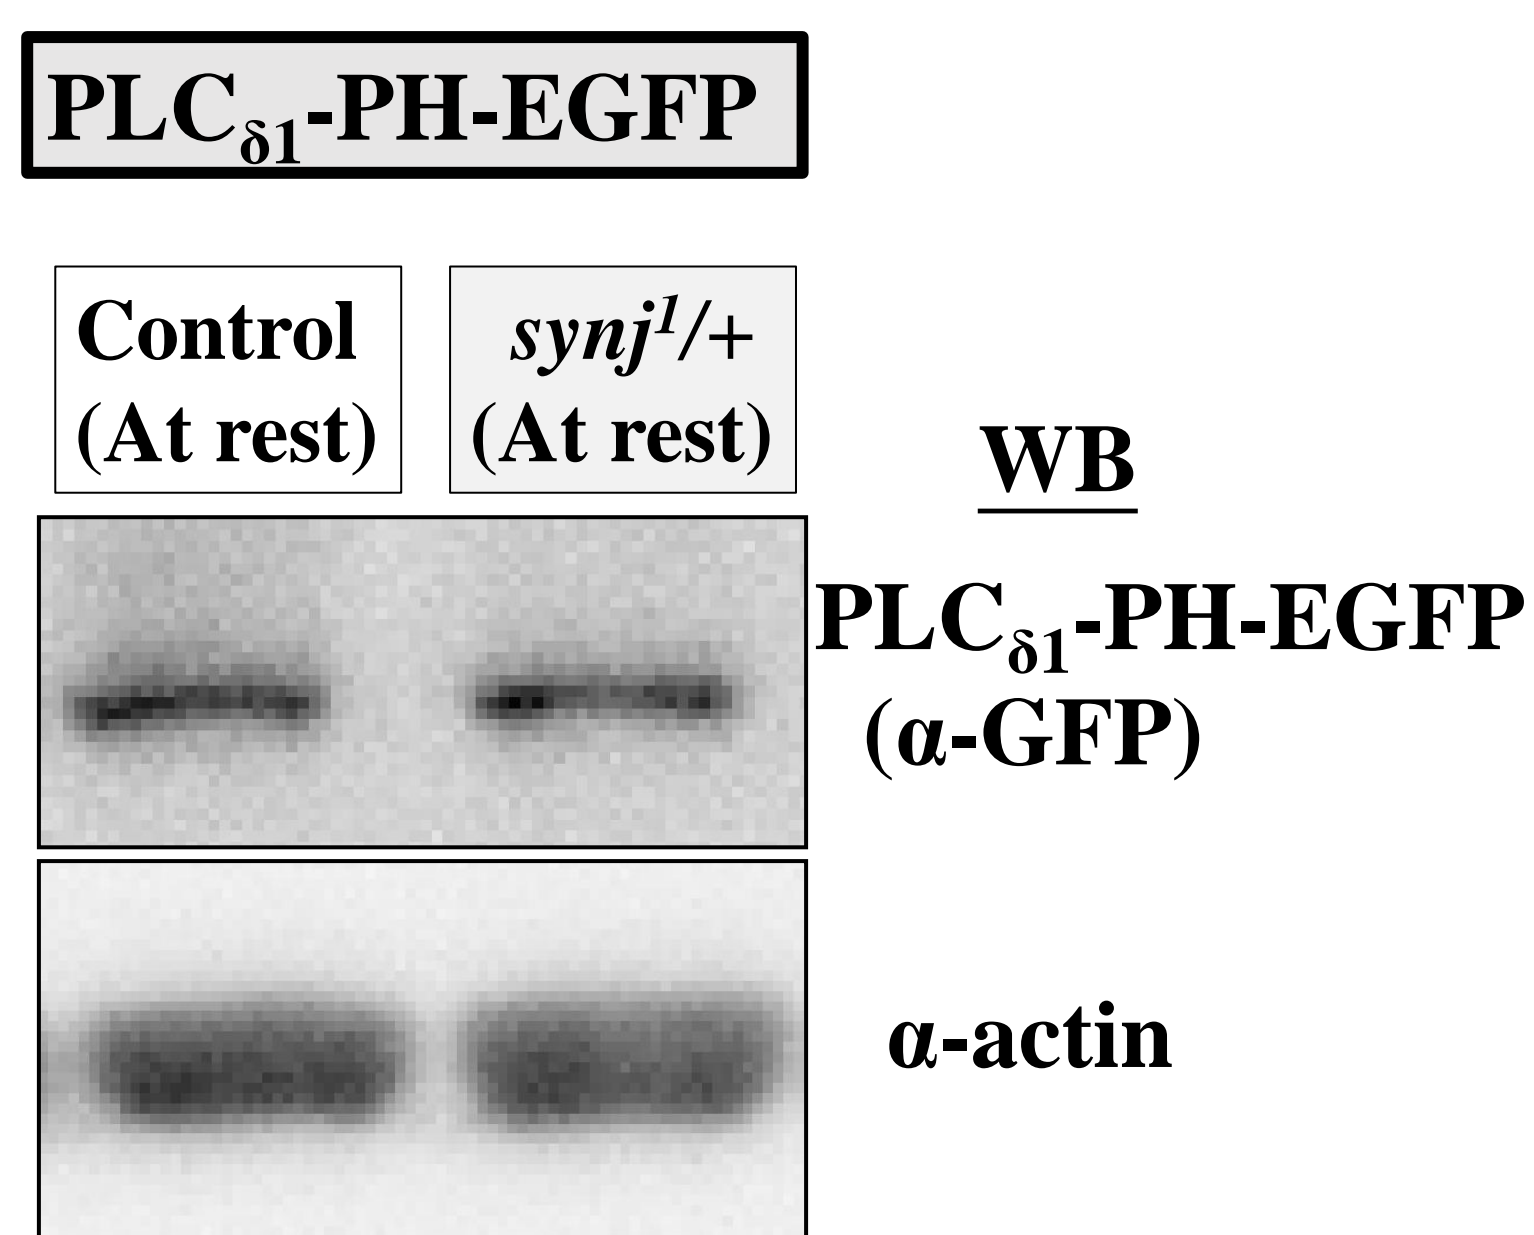

**f**

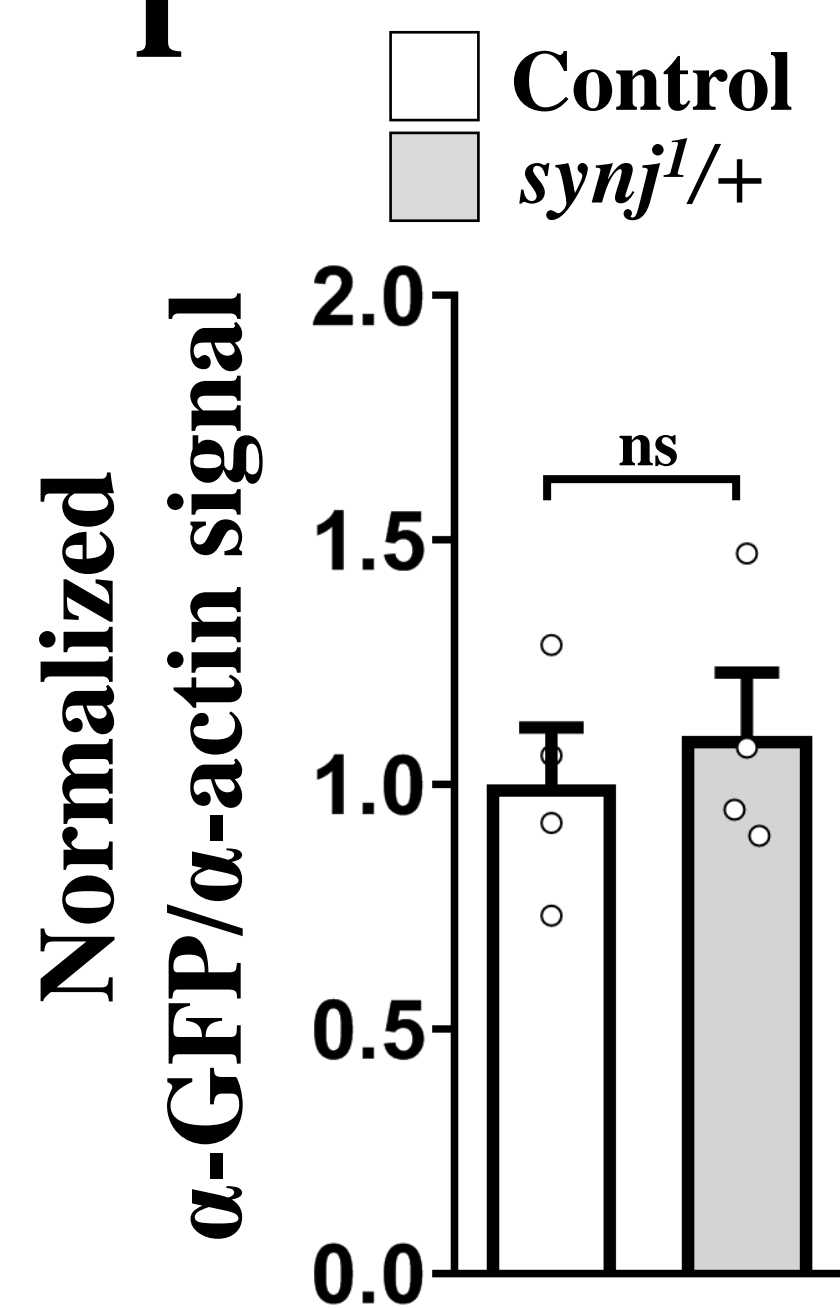

**g**

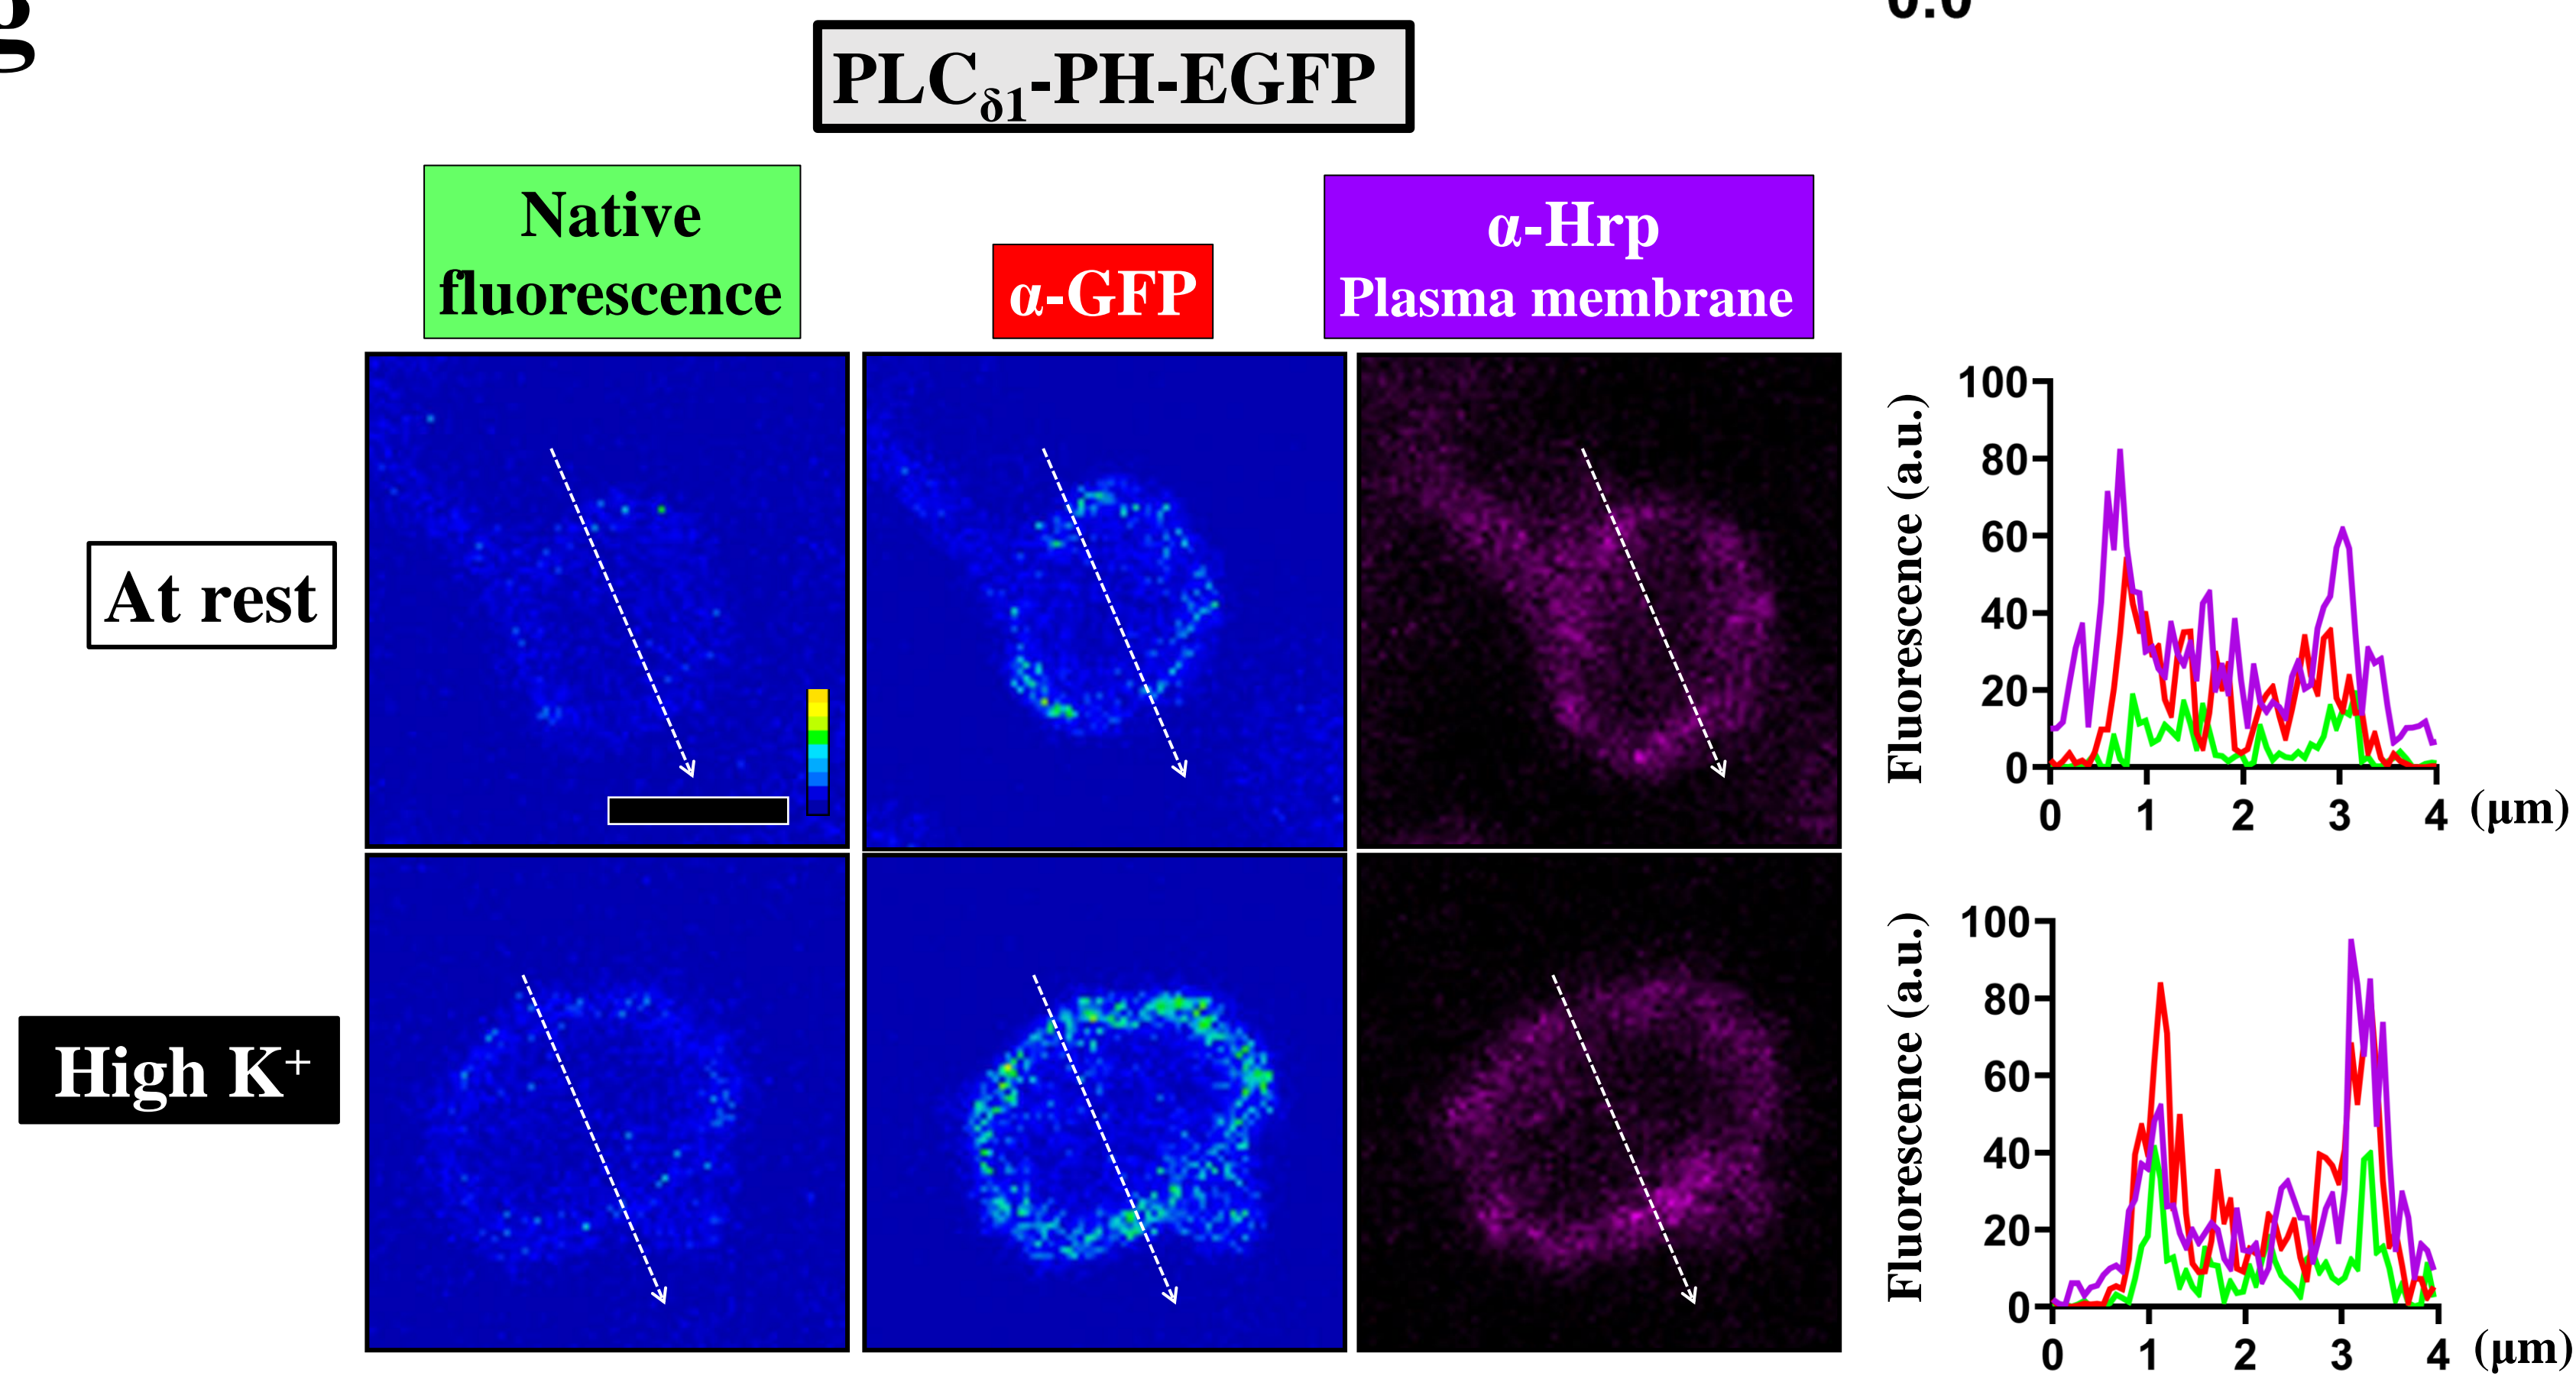

**h**

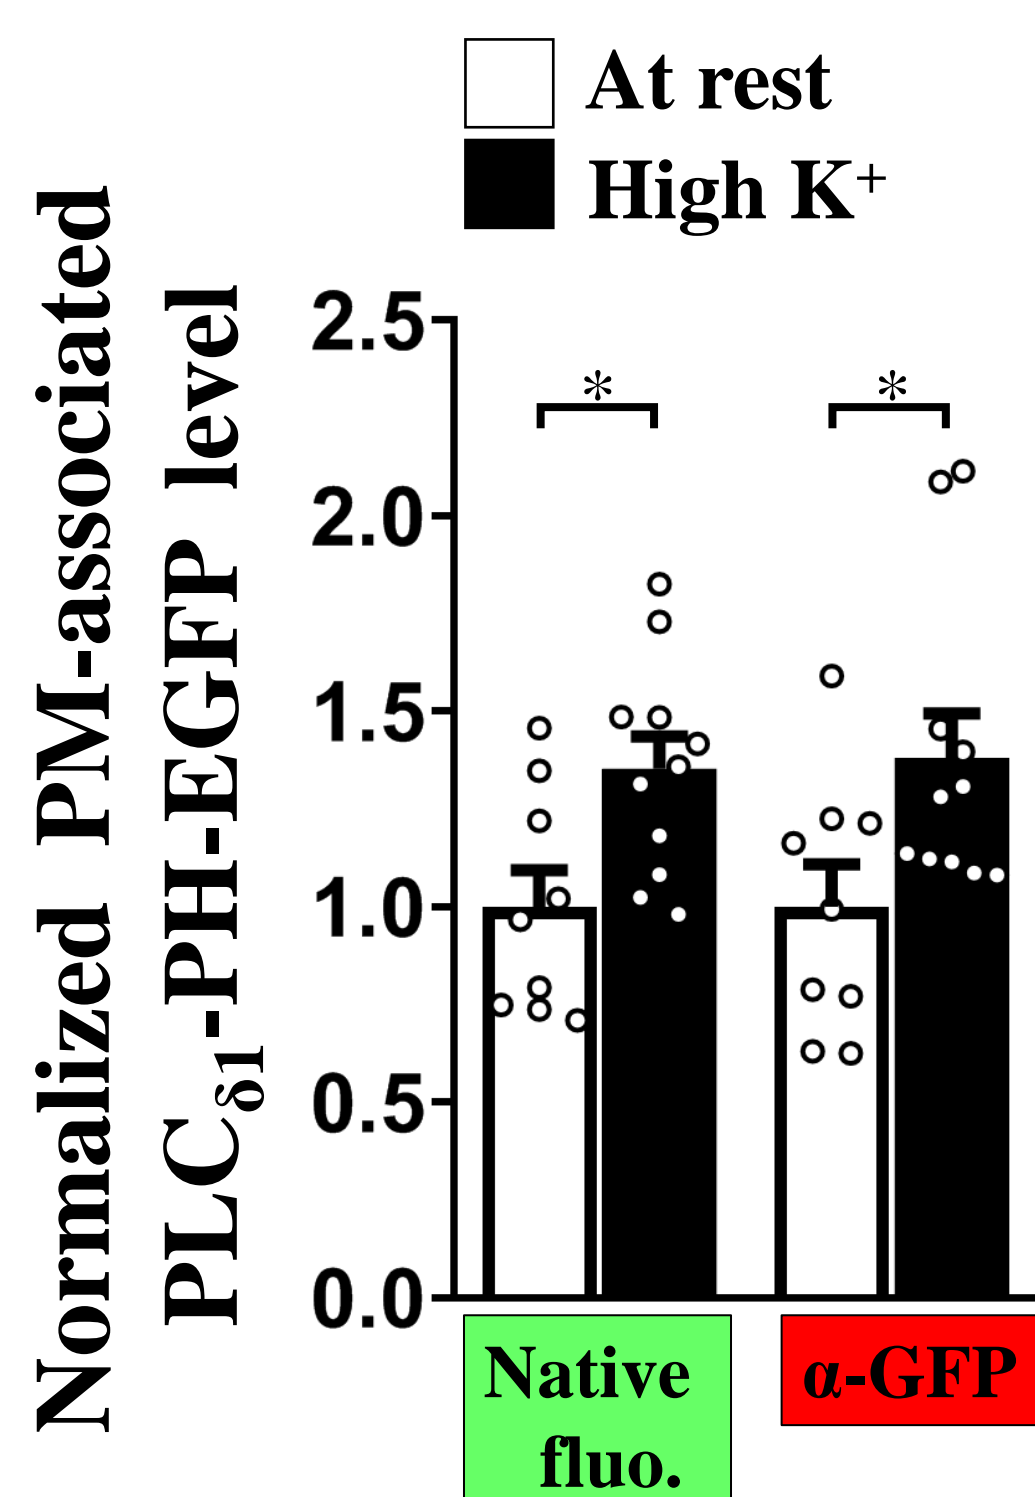

Supplement: supp [file elife_poa_e60125_Figure_1_figure_supplement_1.pdf › elife_poa_e60125_Figure_1_figure_supplement_1.pdf]

# Figure 1-figure supplement 2

**a**

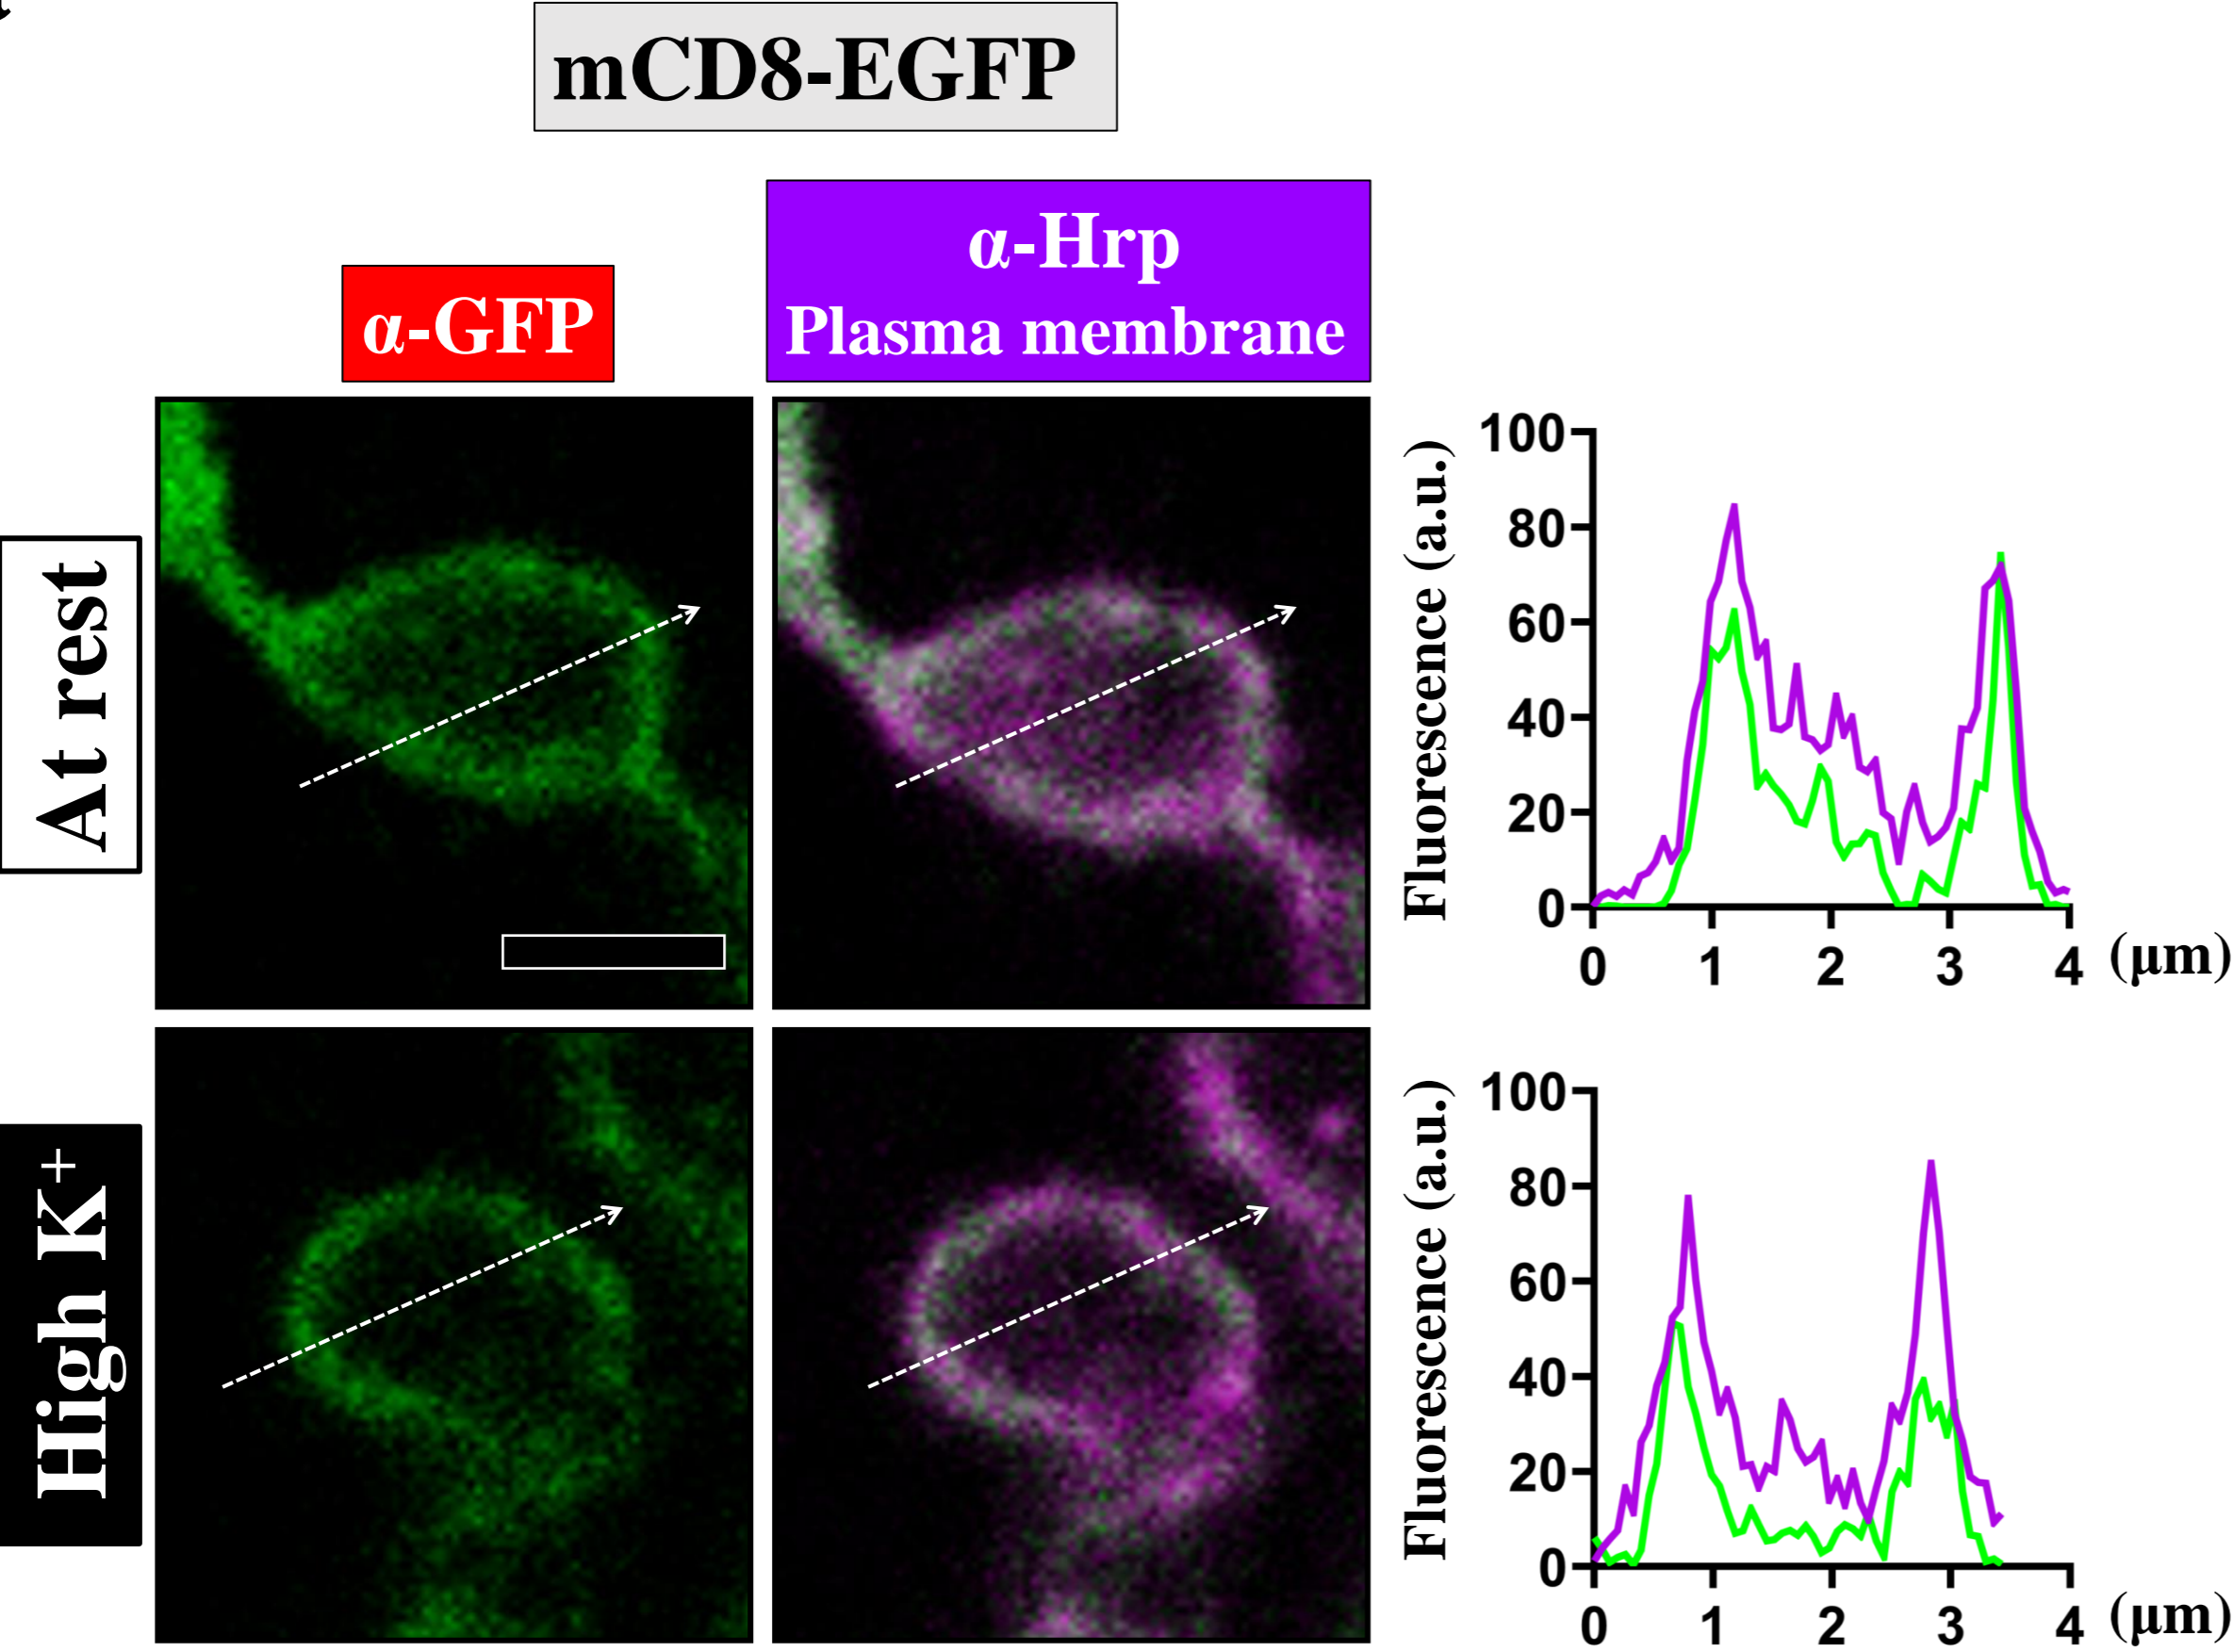

**b**

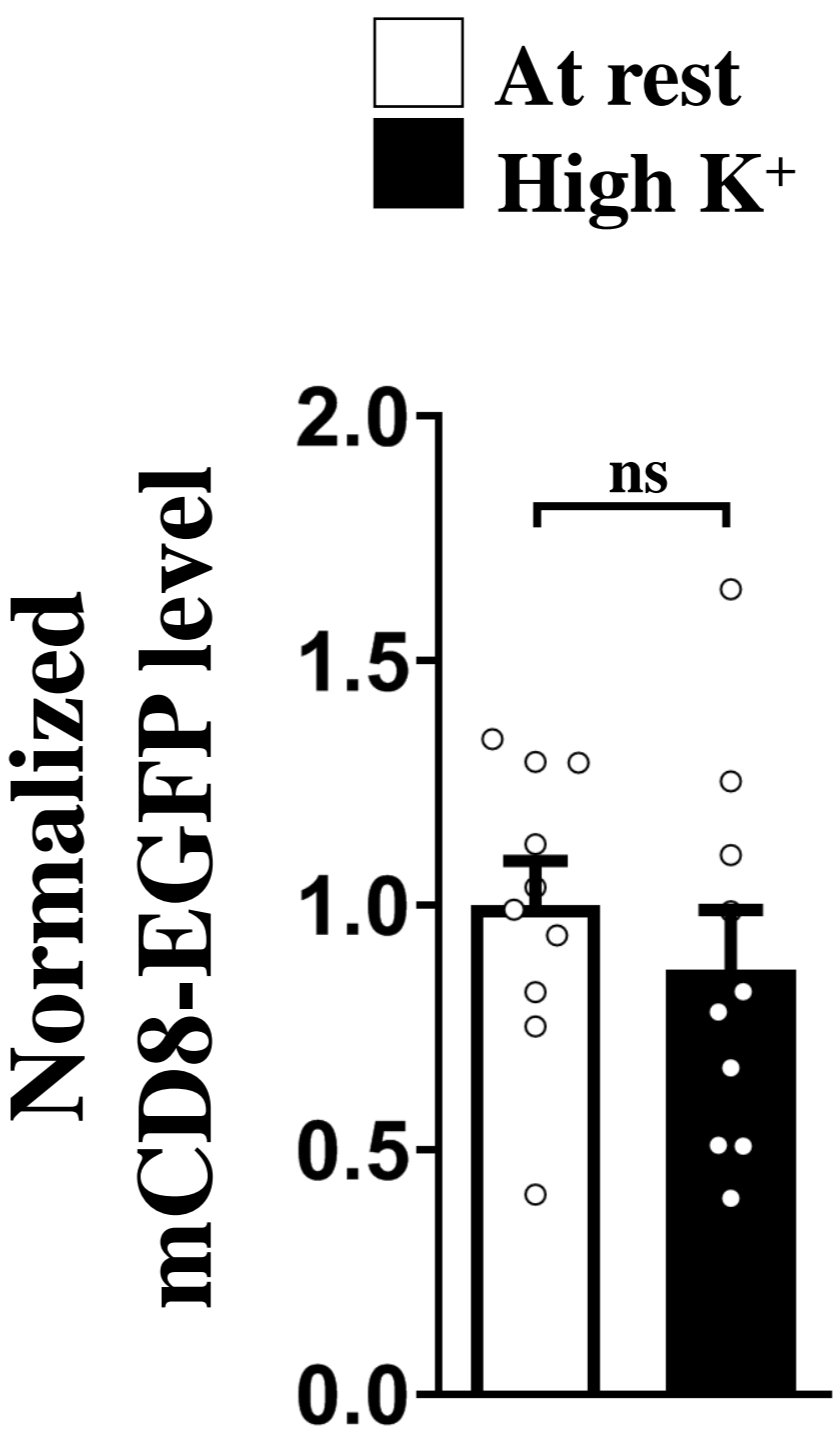

**c**

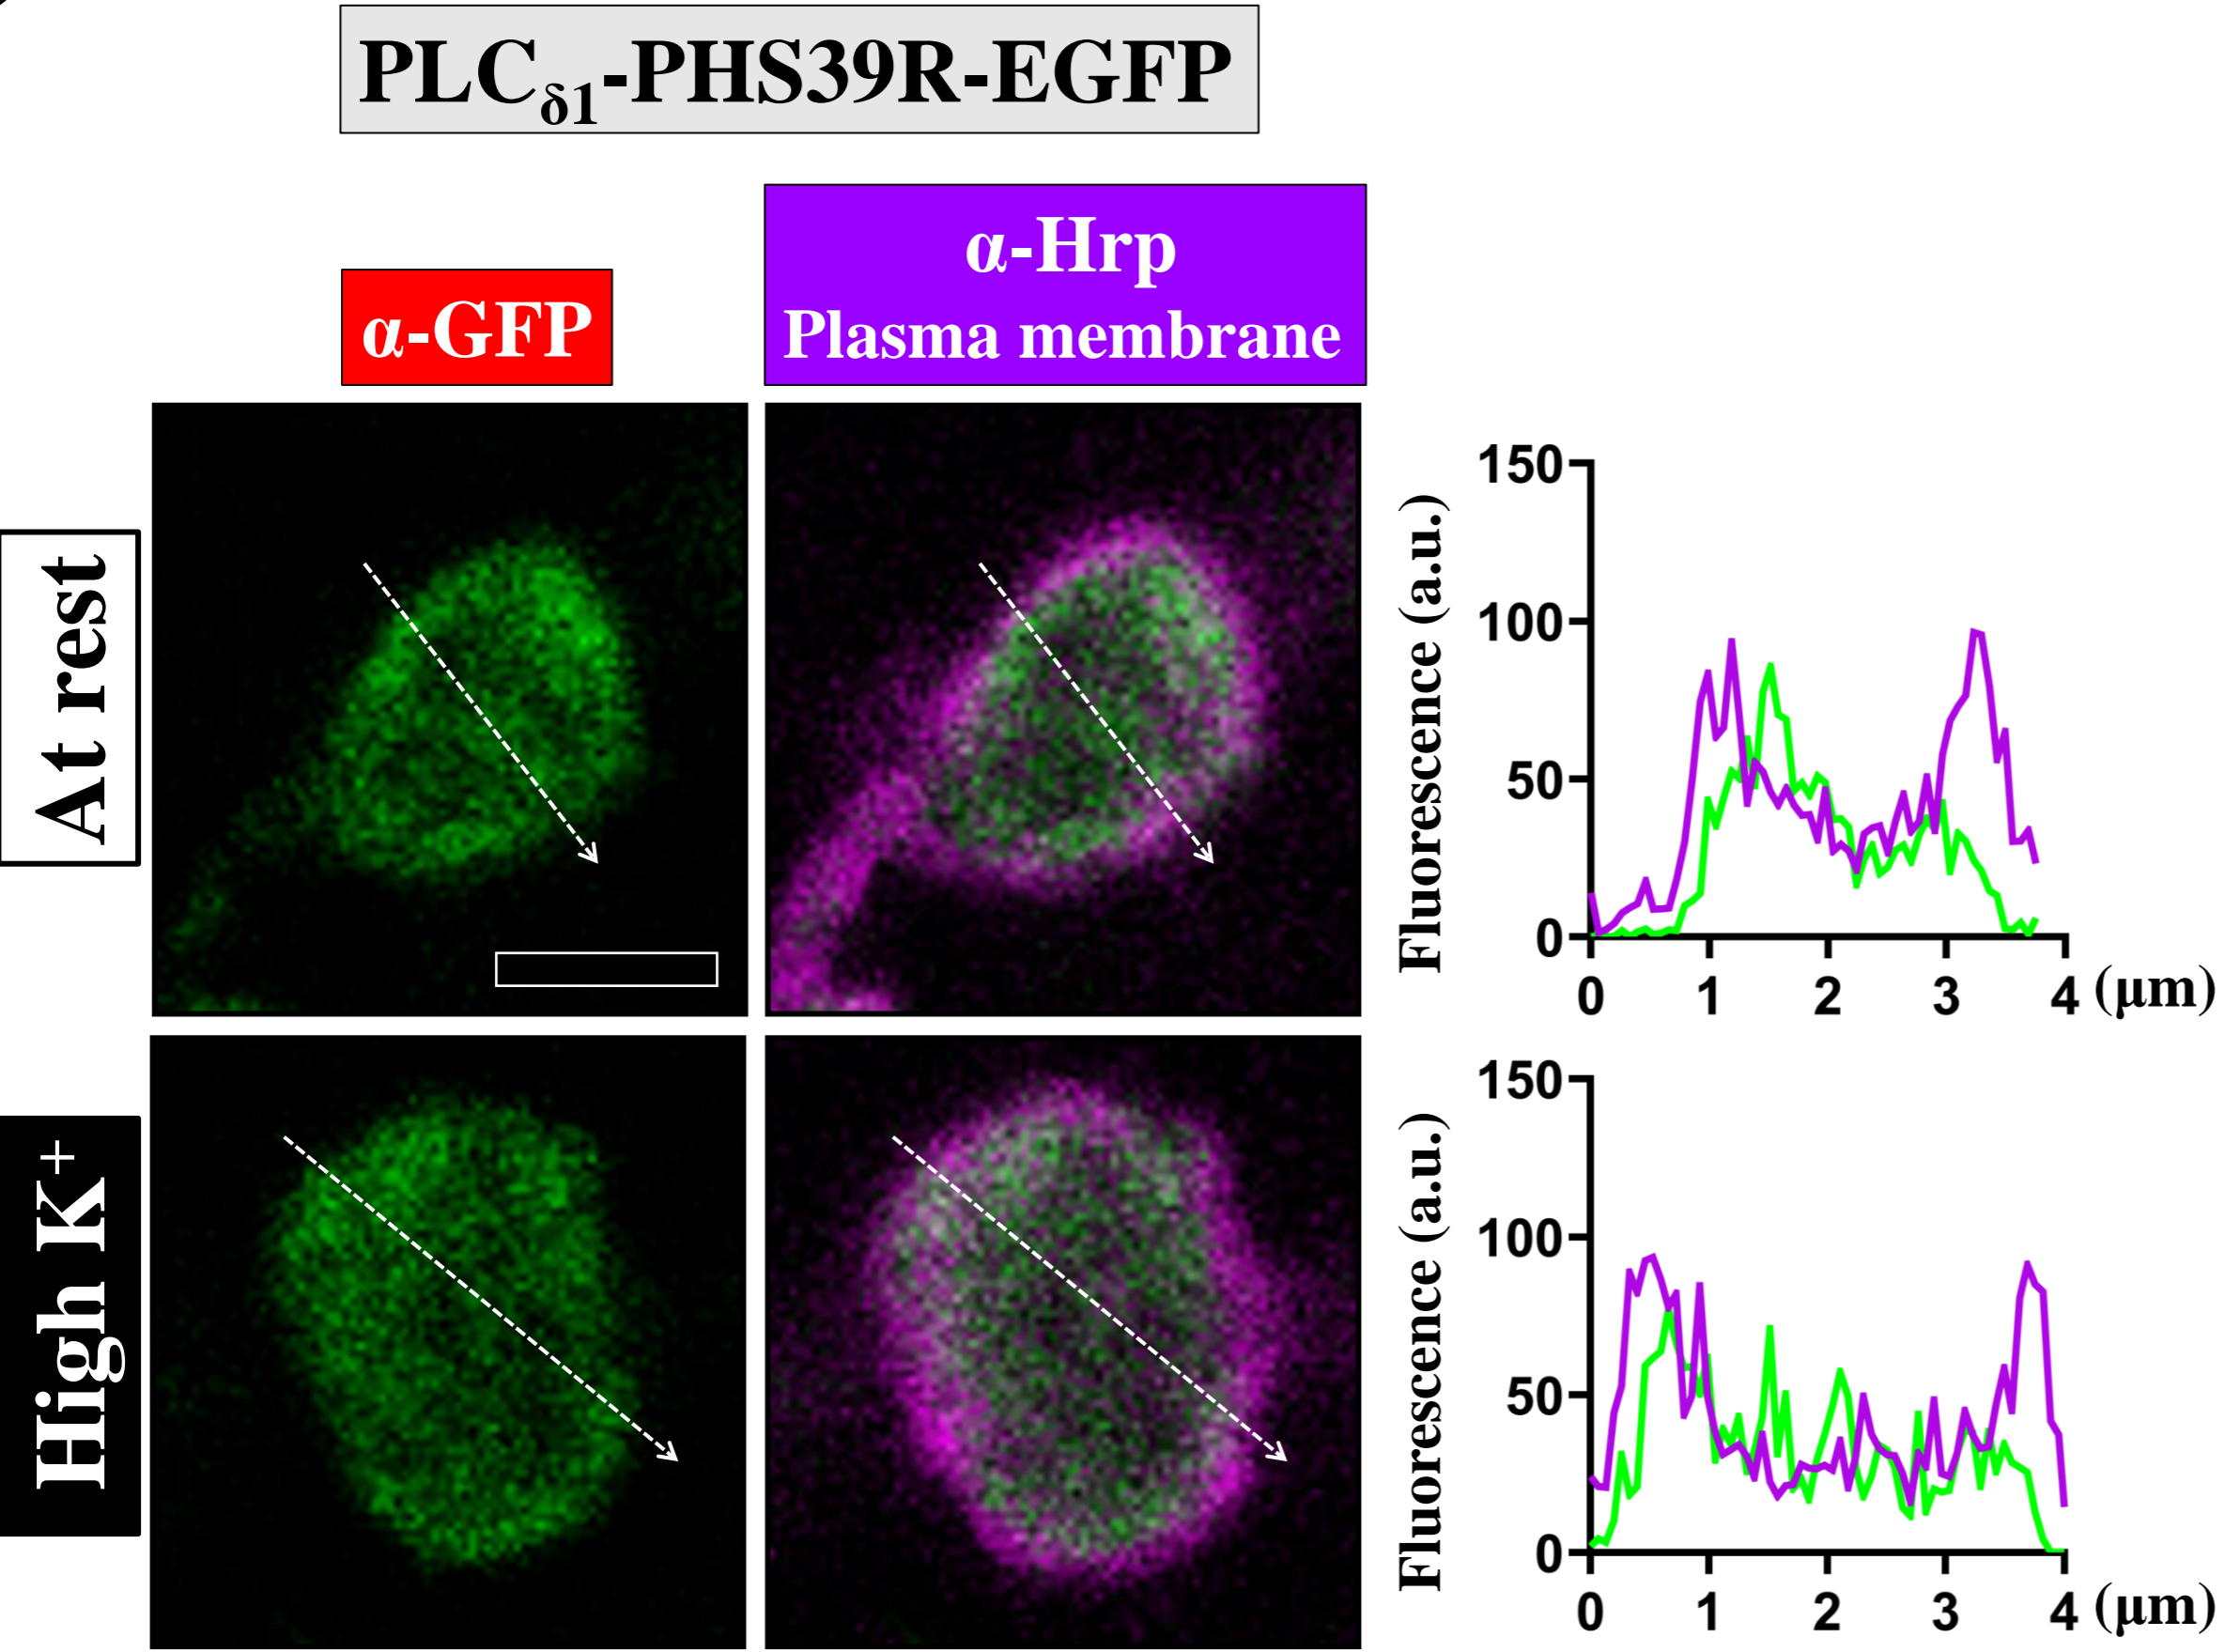

**d**

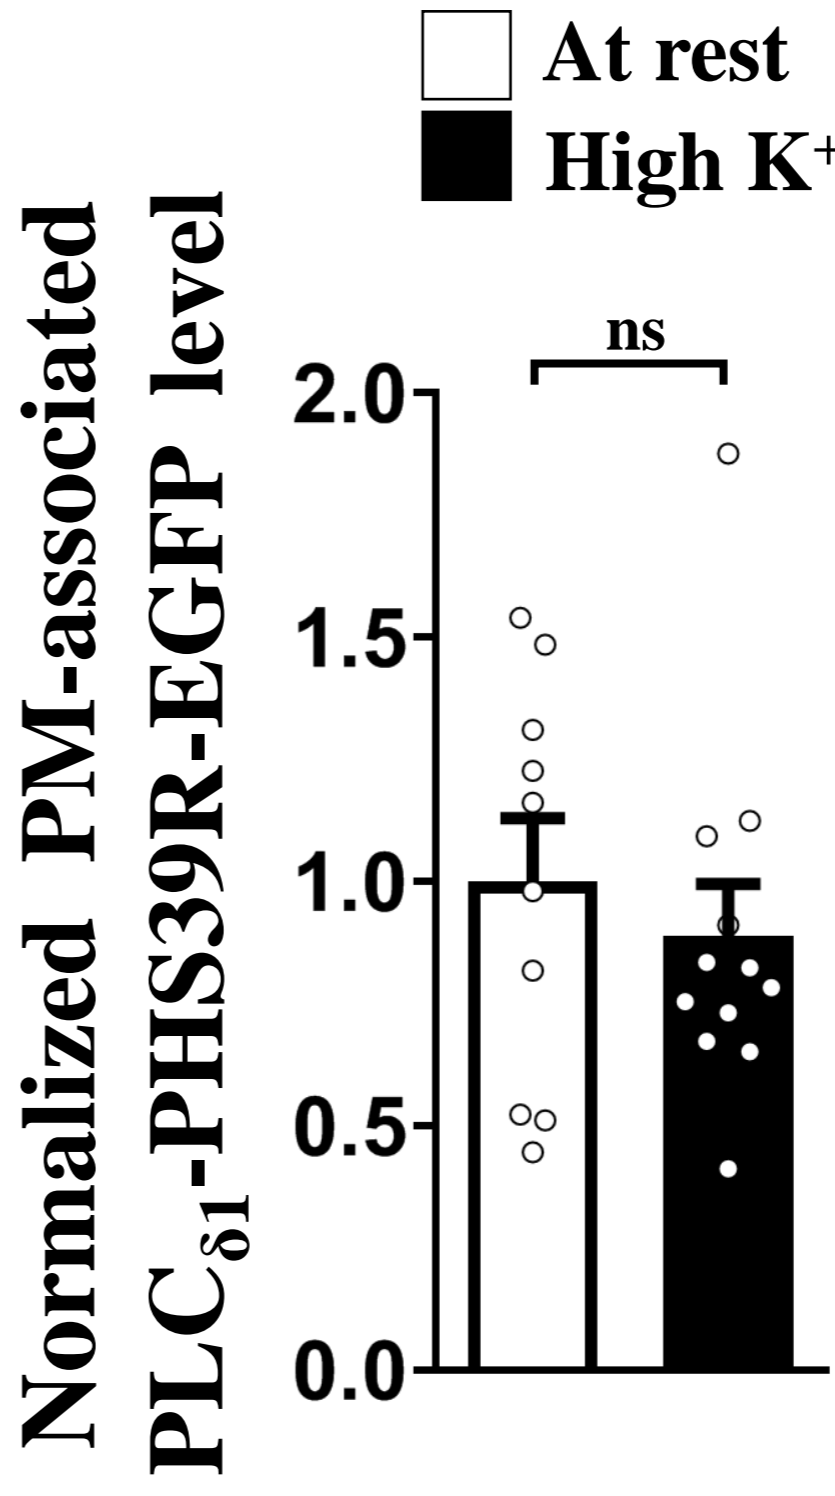

**e**

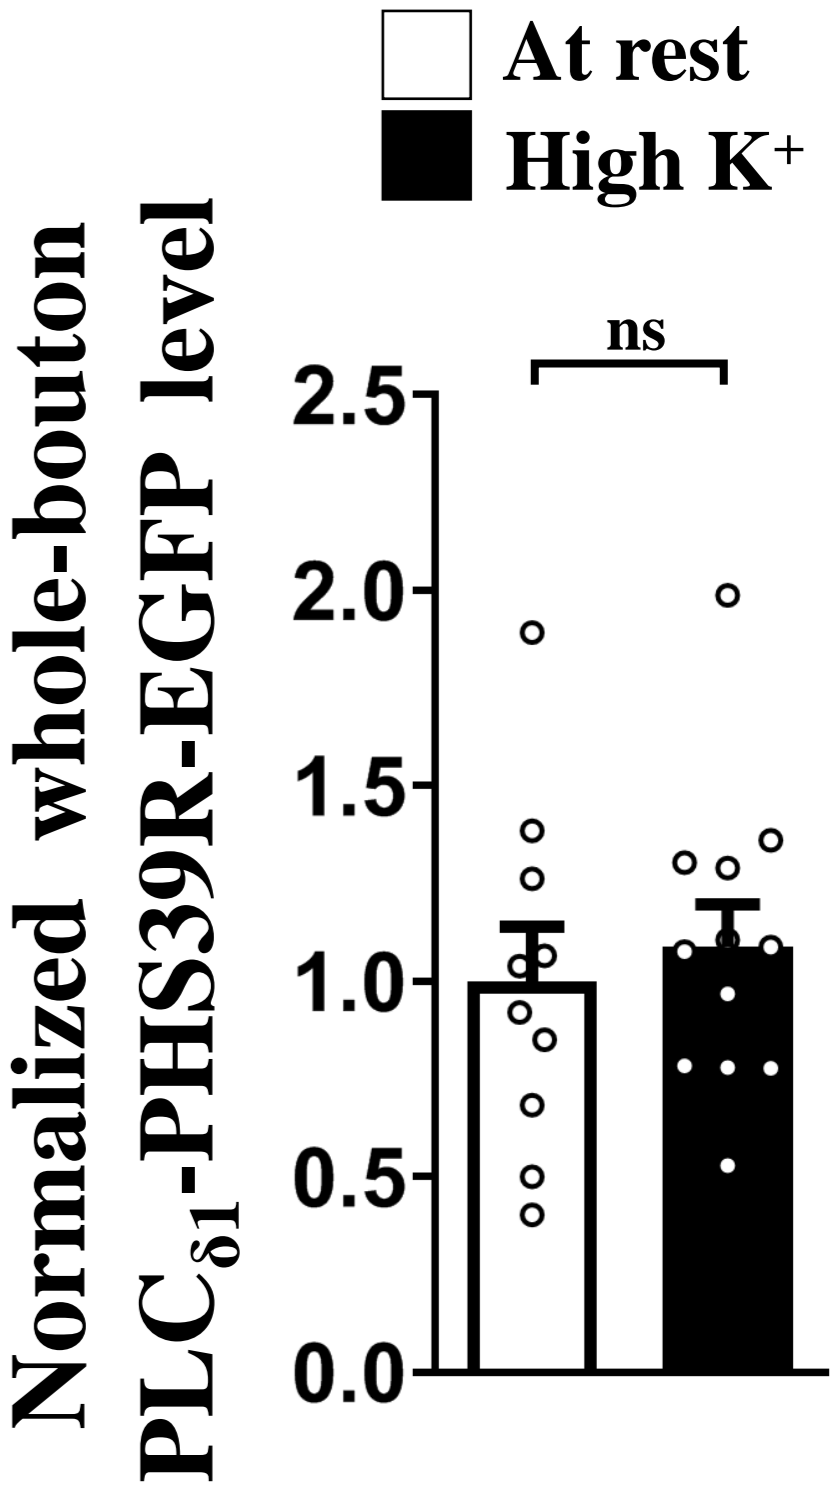

Supplement: supp [file elife_poa_e60125_Figure_1_figure_supplement_2.pdf › elife_poa_e60125_Figure_1_figure_supplement_2.pdf]

Figure 1-figure supplement 3

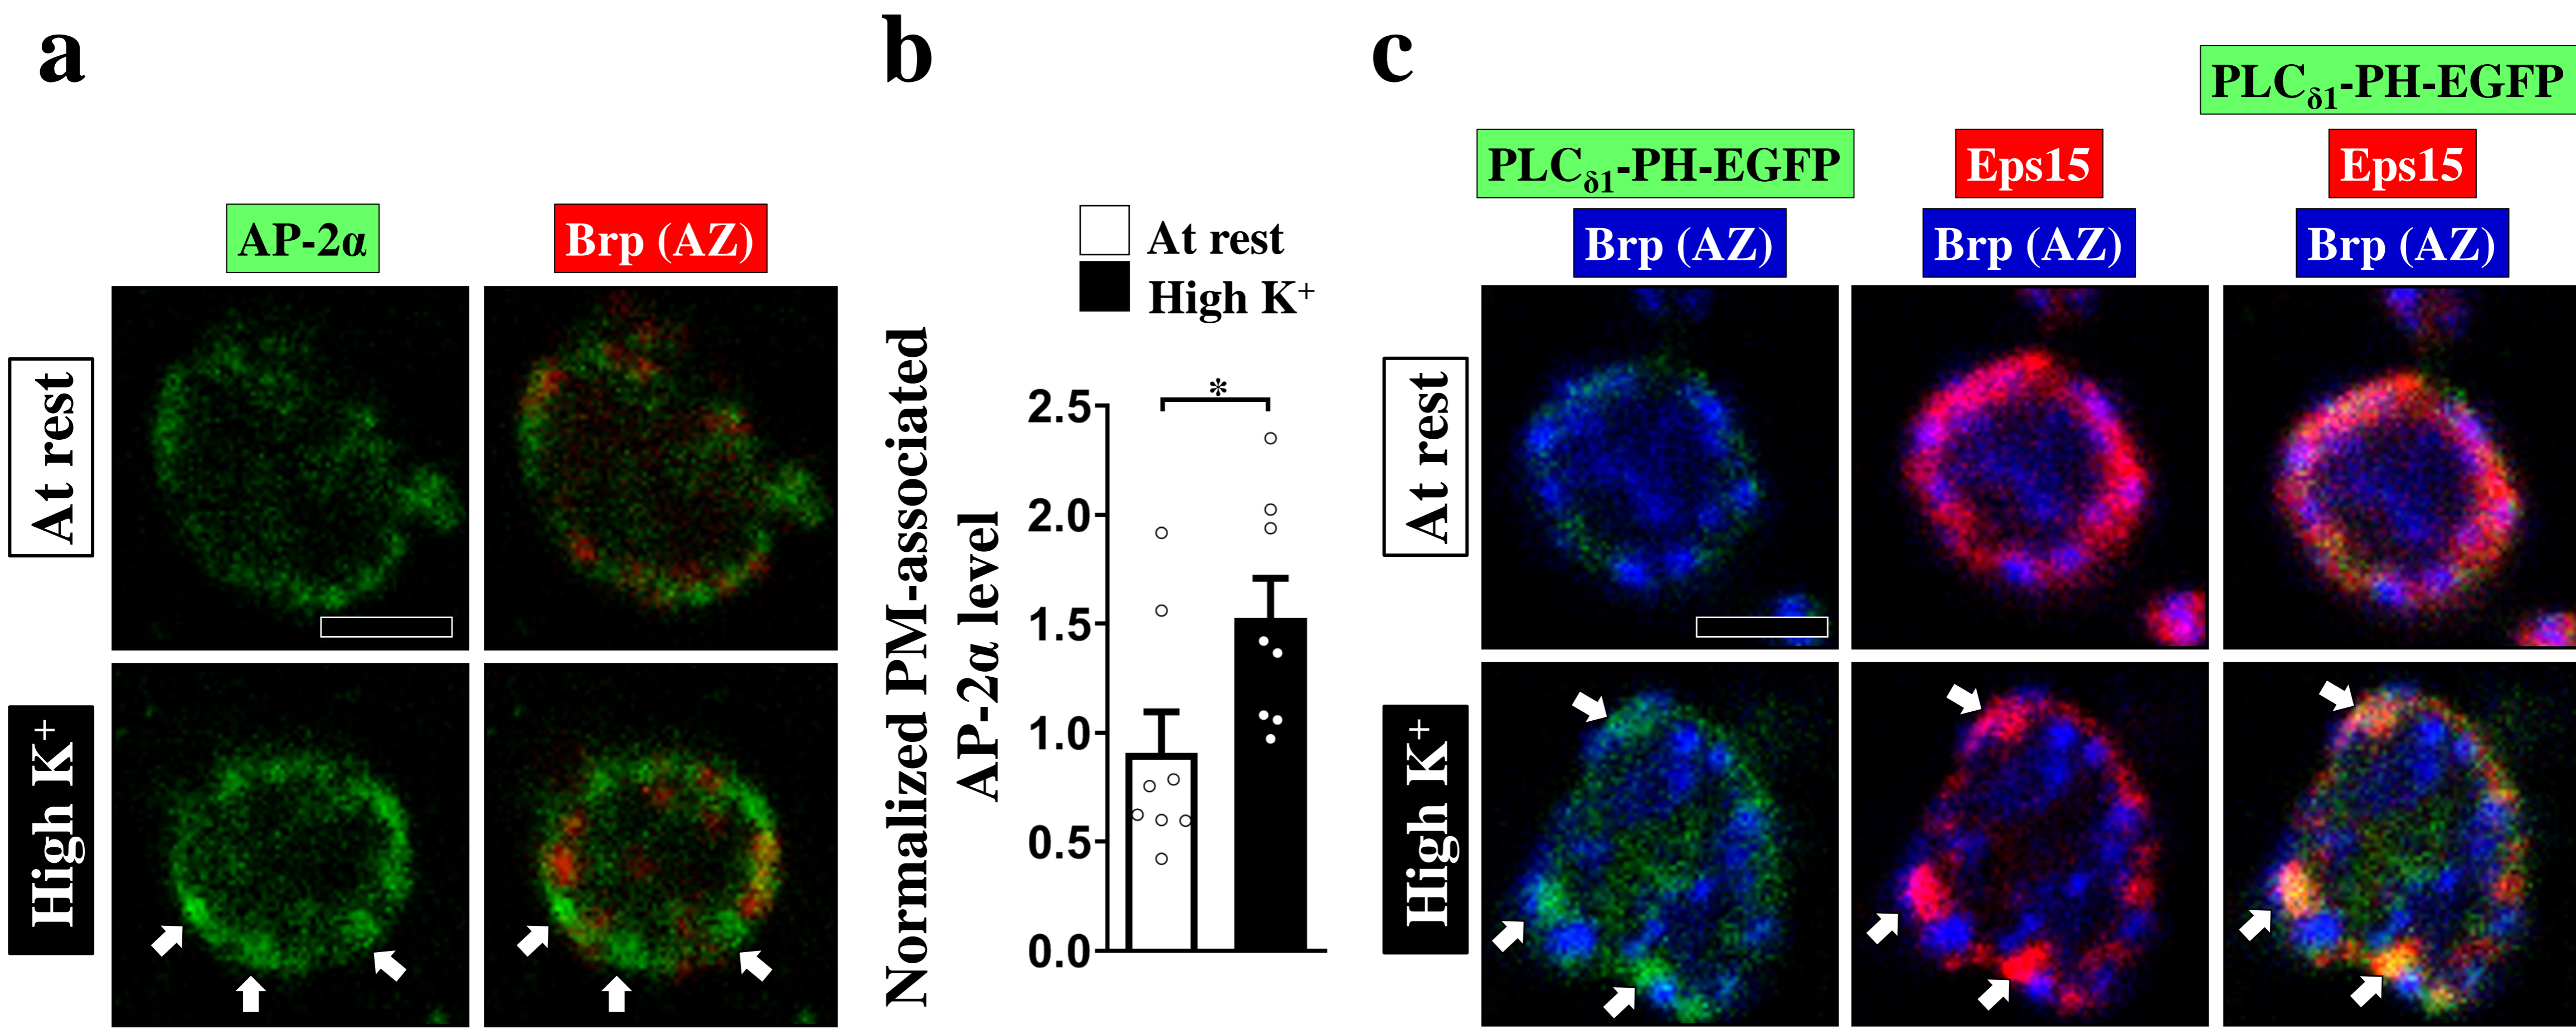

Supplement: supp [file elife_poa_e60125_Figure_1_figure_supplement_3.pdf › elife_poa_e60125_Figure_1_figure_supplement_3.pdf]

# Figure 2-figure supplement 1

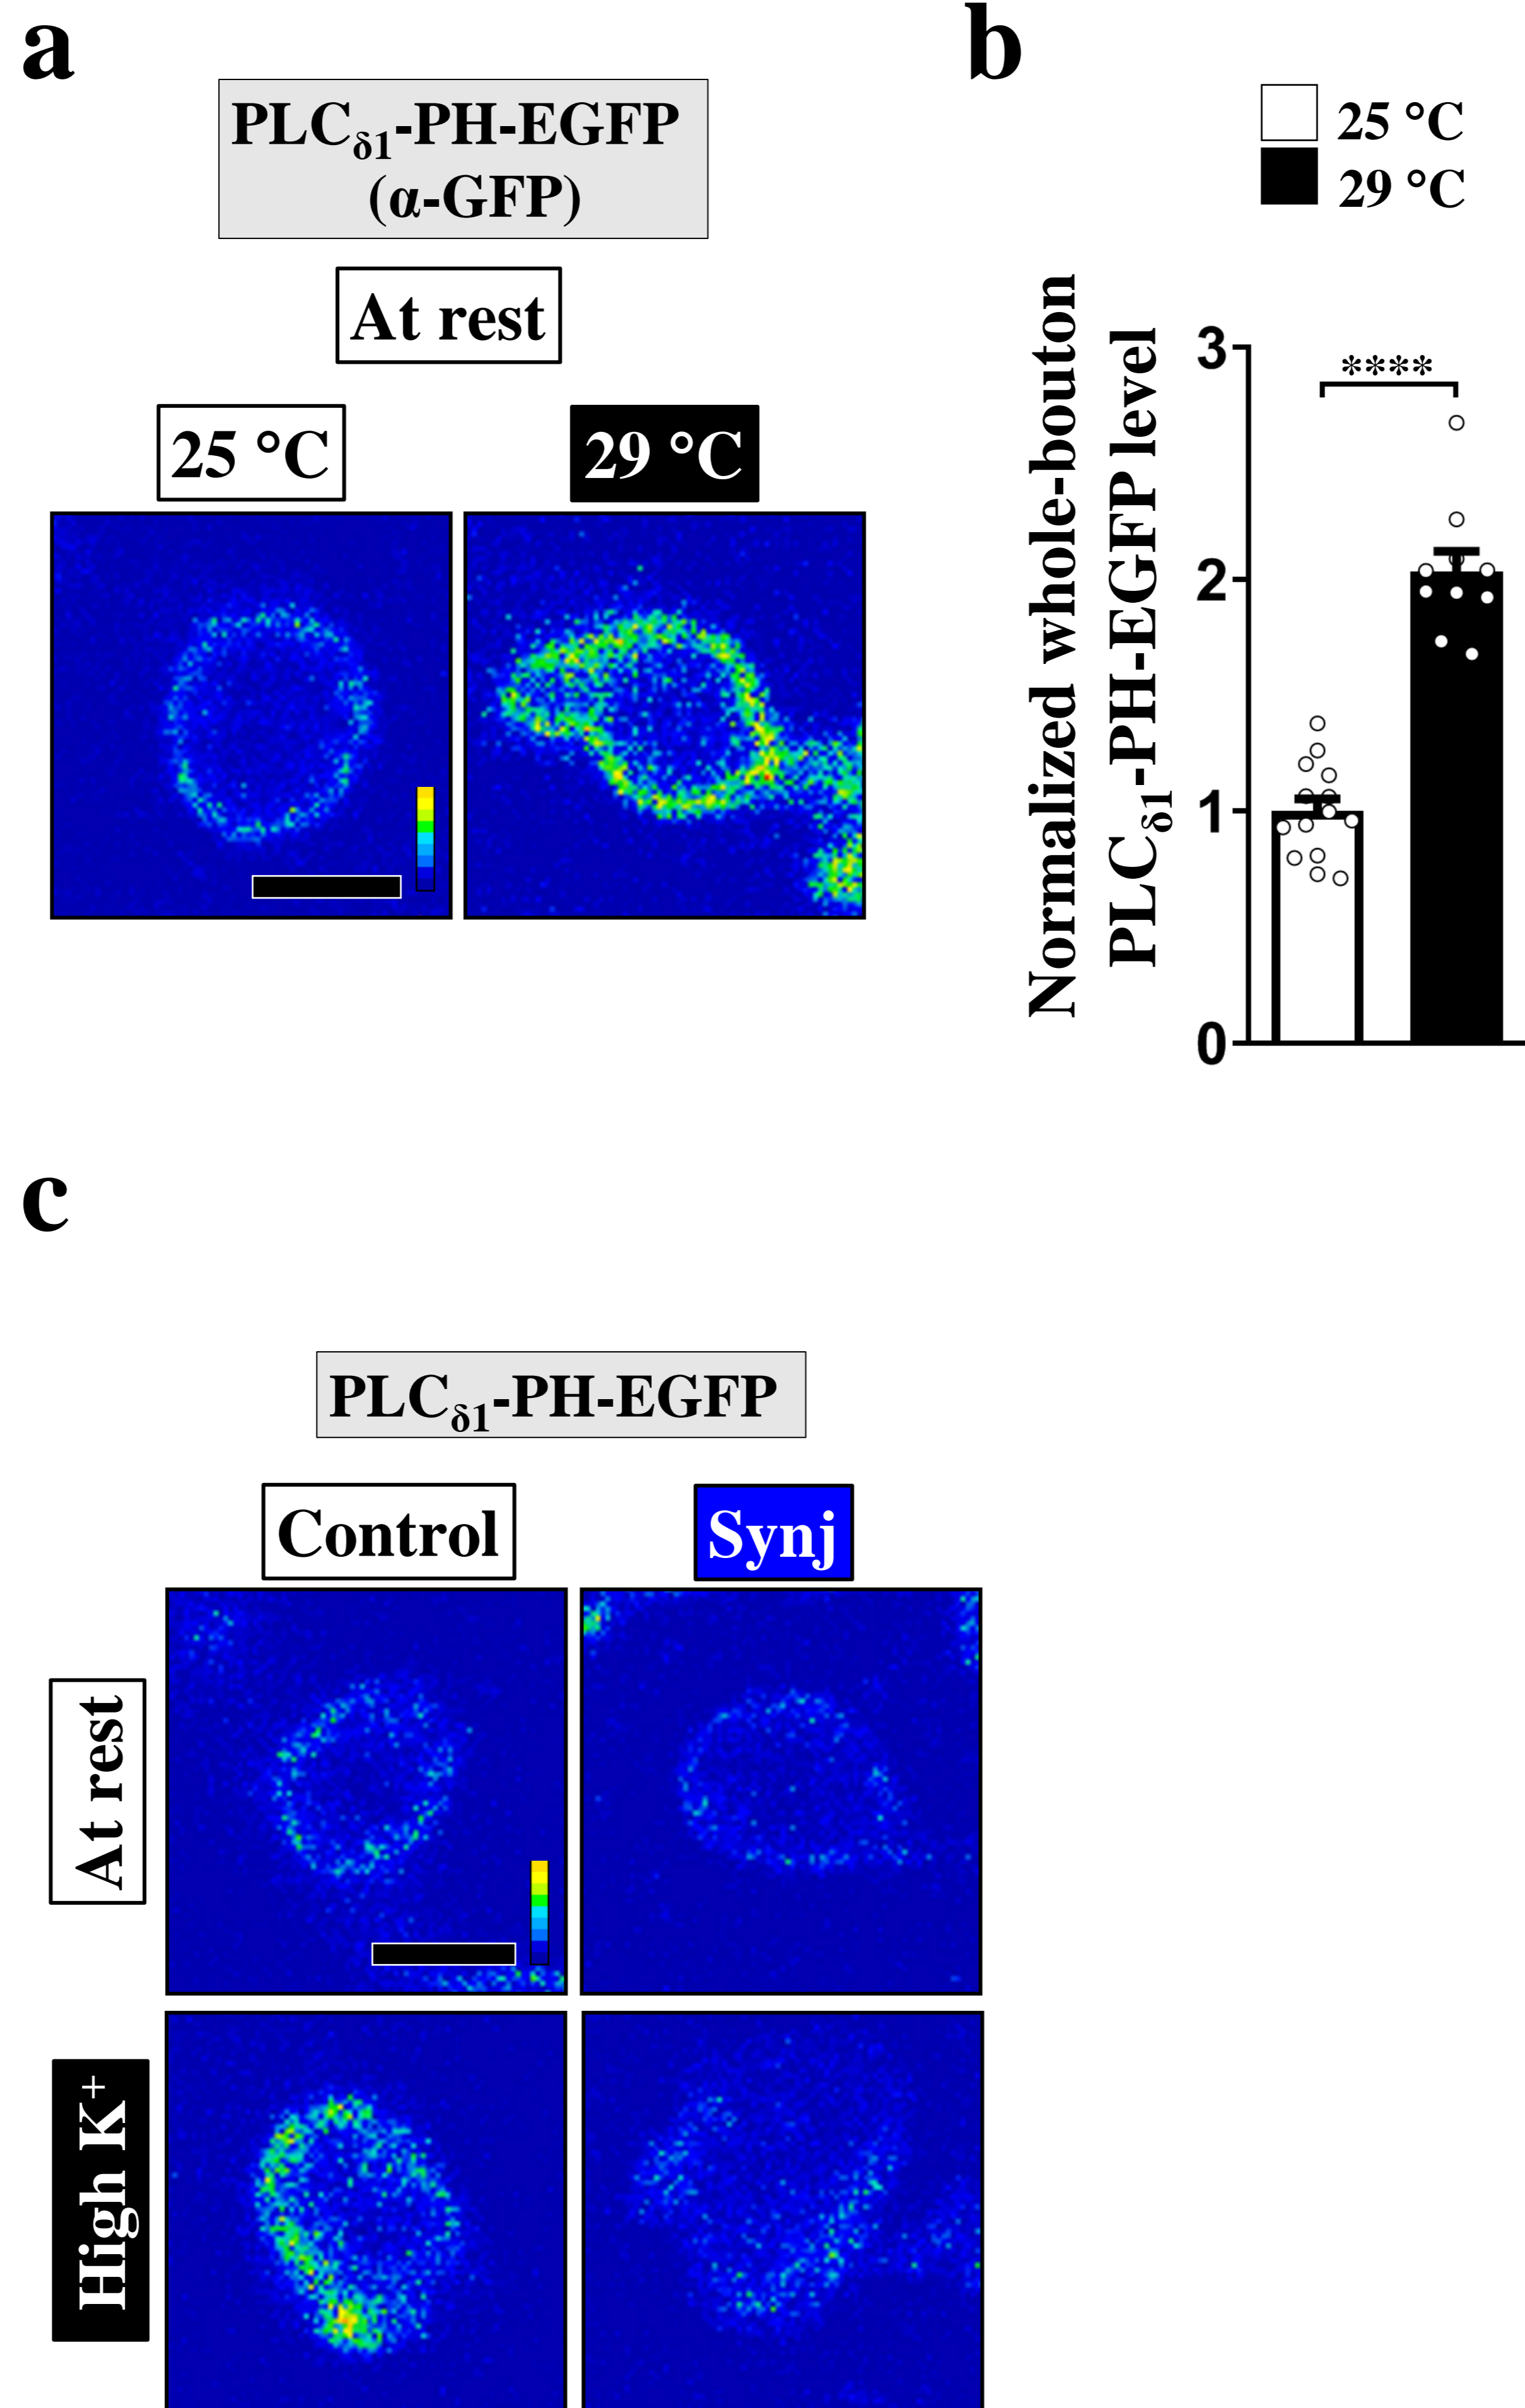

Supplement: supp [file elife_poa_e60125_Figure_2_figure_supplement_1.pdf › elife_poa_e60125_Figure_2_figure_supplement_1.pdf]

## Figure 2-figure supplement 2

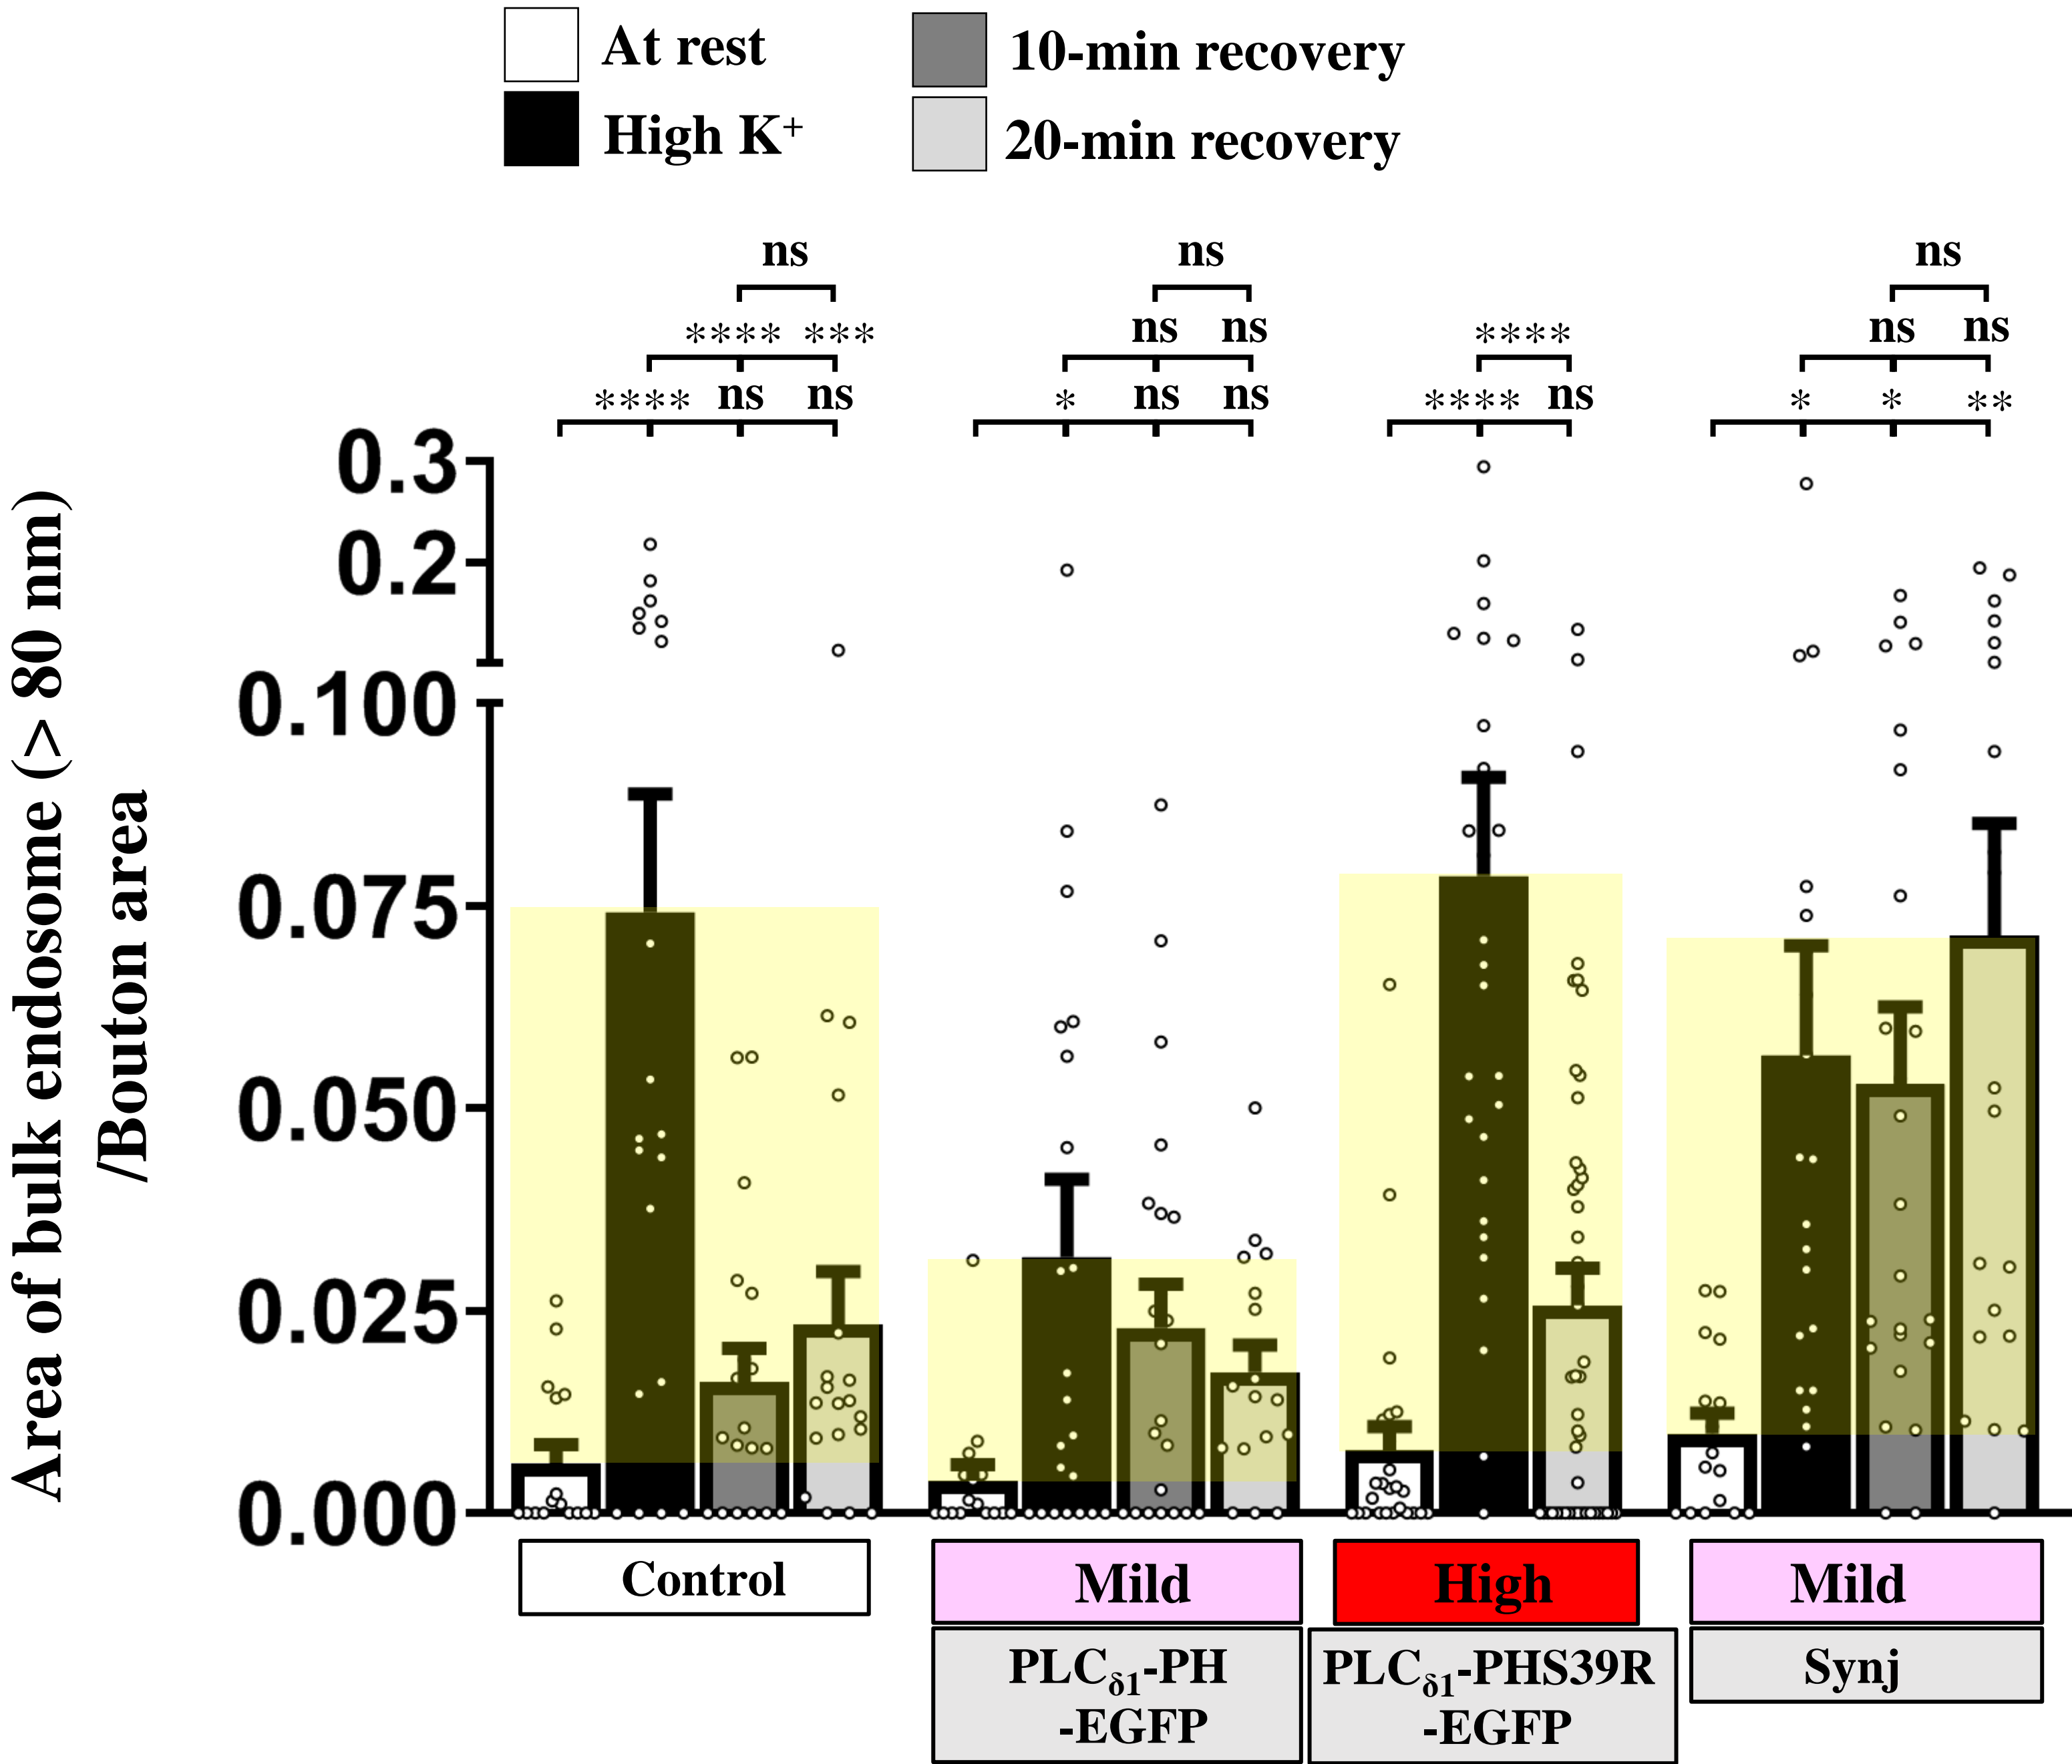

Supplement: supp [file elife_poa_e60125_Figure_2_figure_supplement_2.pdf › elife_poa_e60125_Figure_2_figure_supplement_2.pdf]

# Figure 4-figure supplement 1

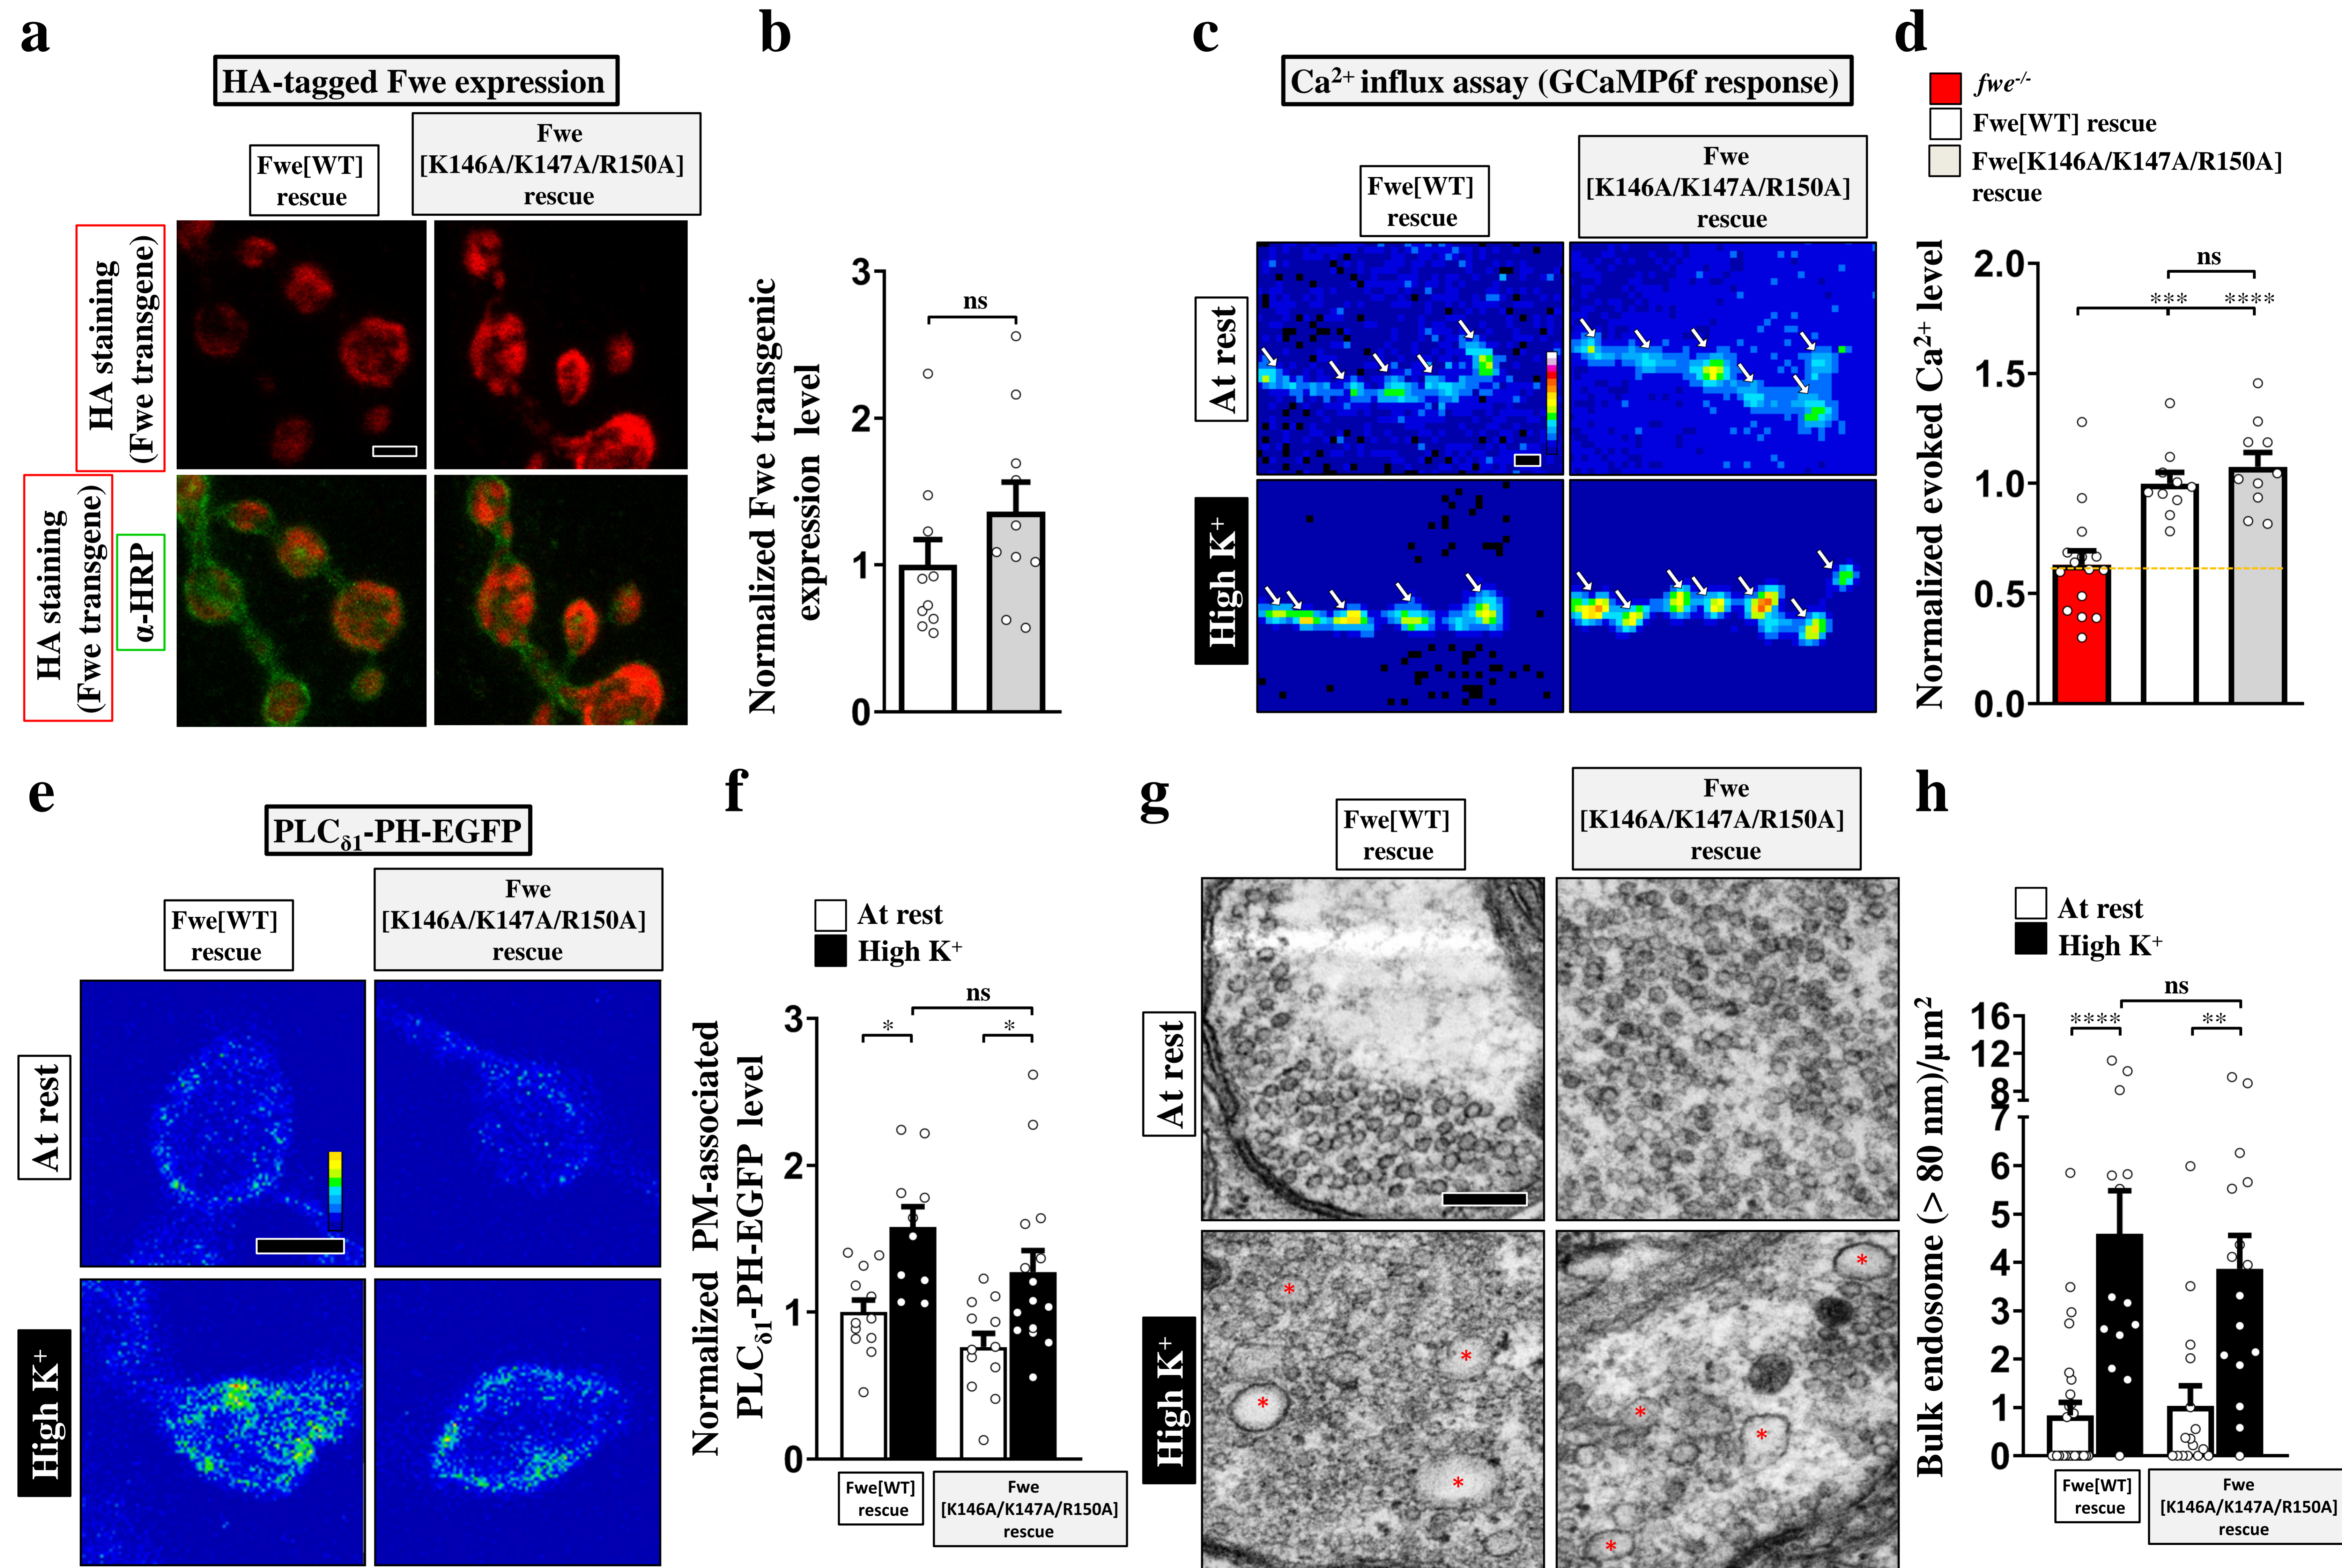

Supplement: supp [file elife_poa_e60125_Figure_4_figure_supplement_1.pdf › elife_poa_e60125_Figure_4_figure_supplement_1.pdf]

Figure 4-figure supplement 2

**a**

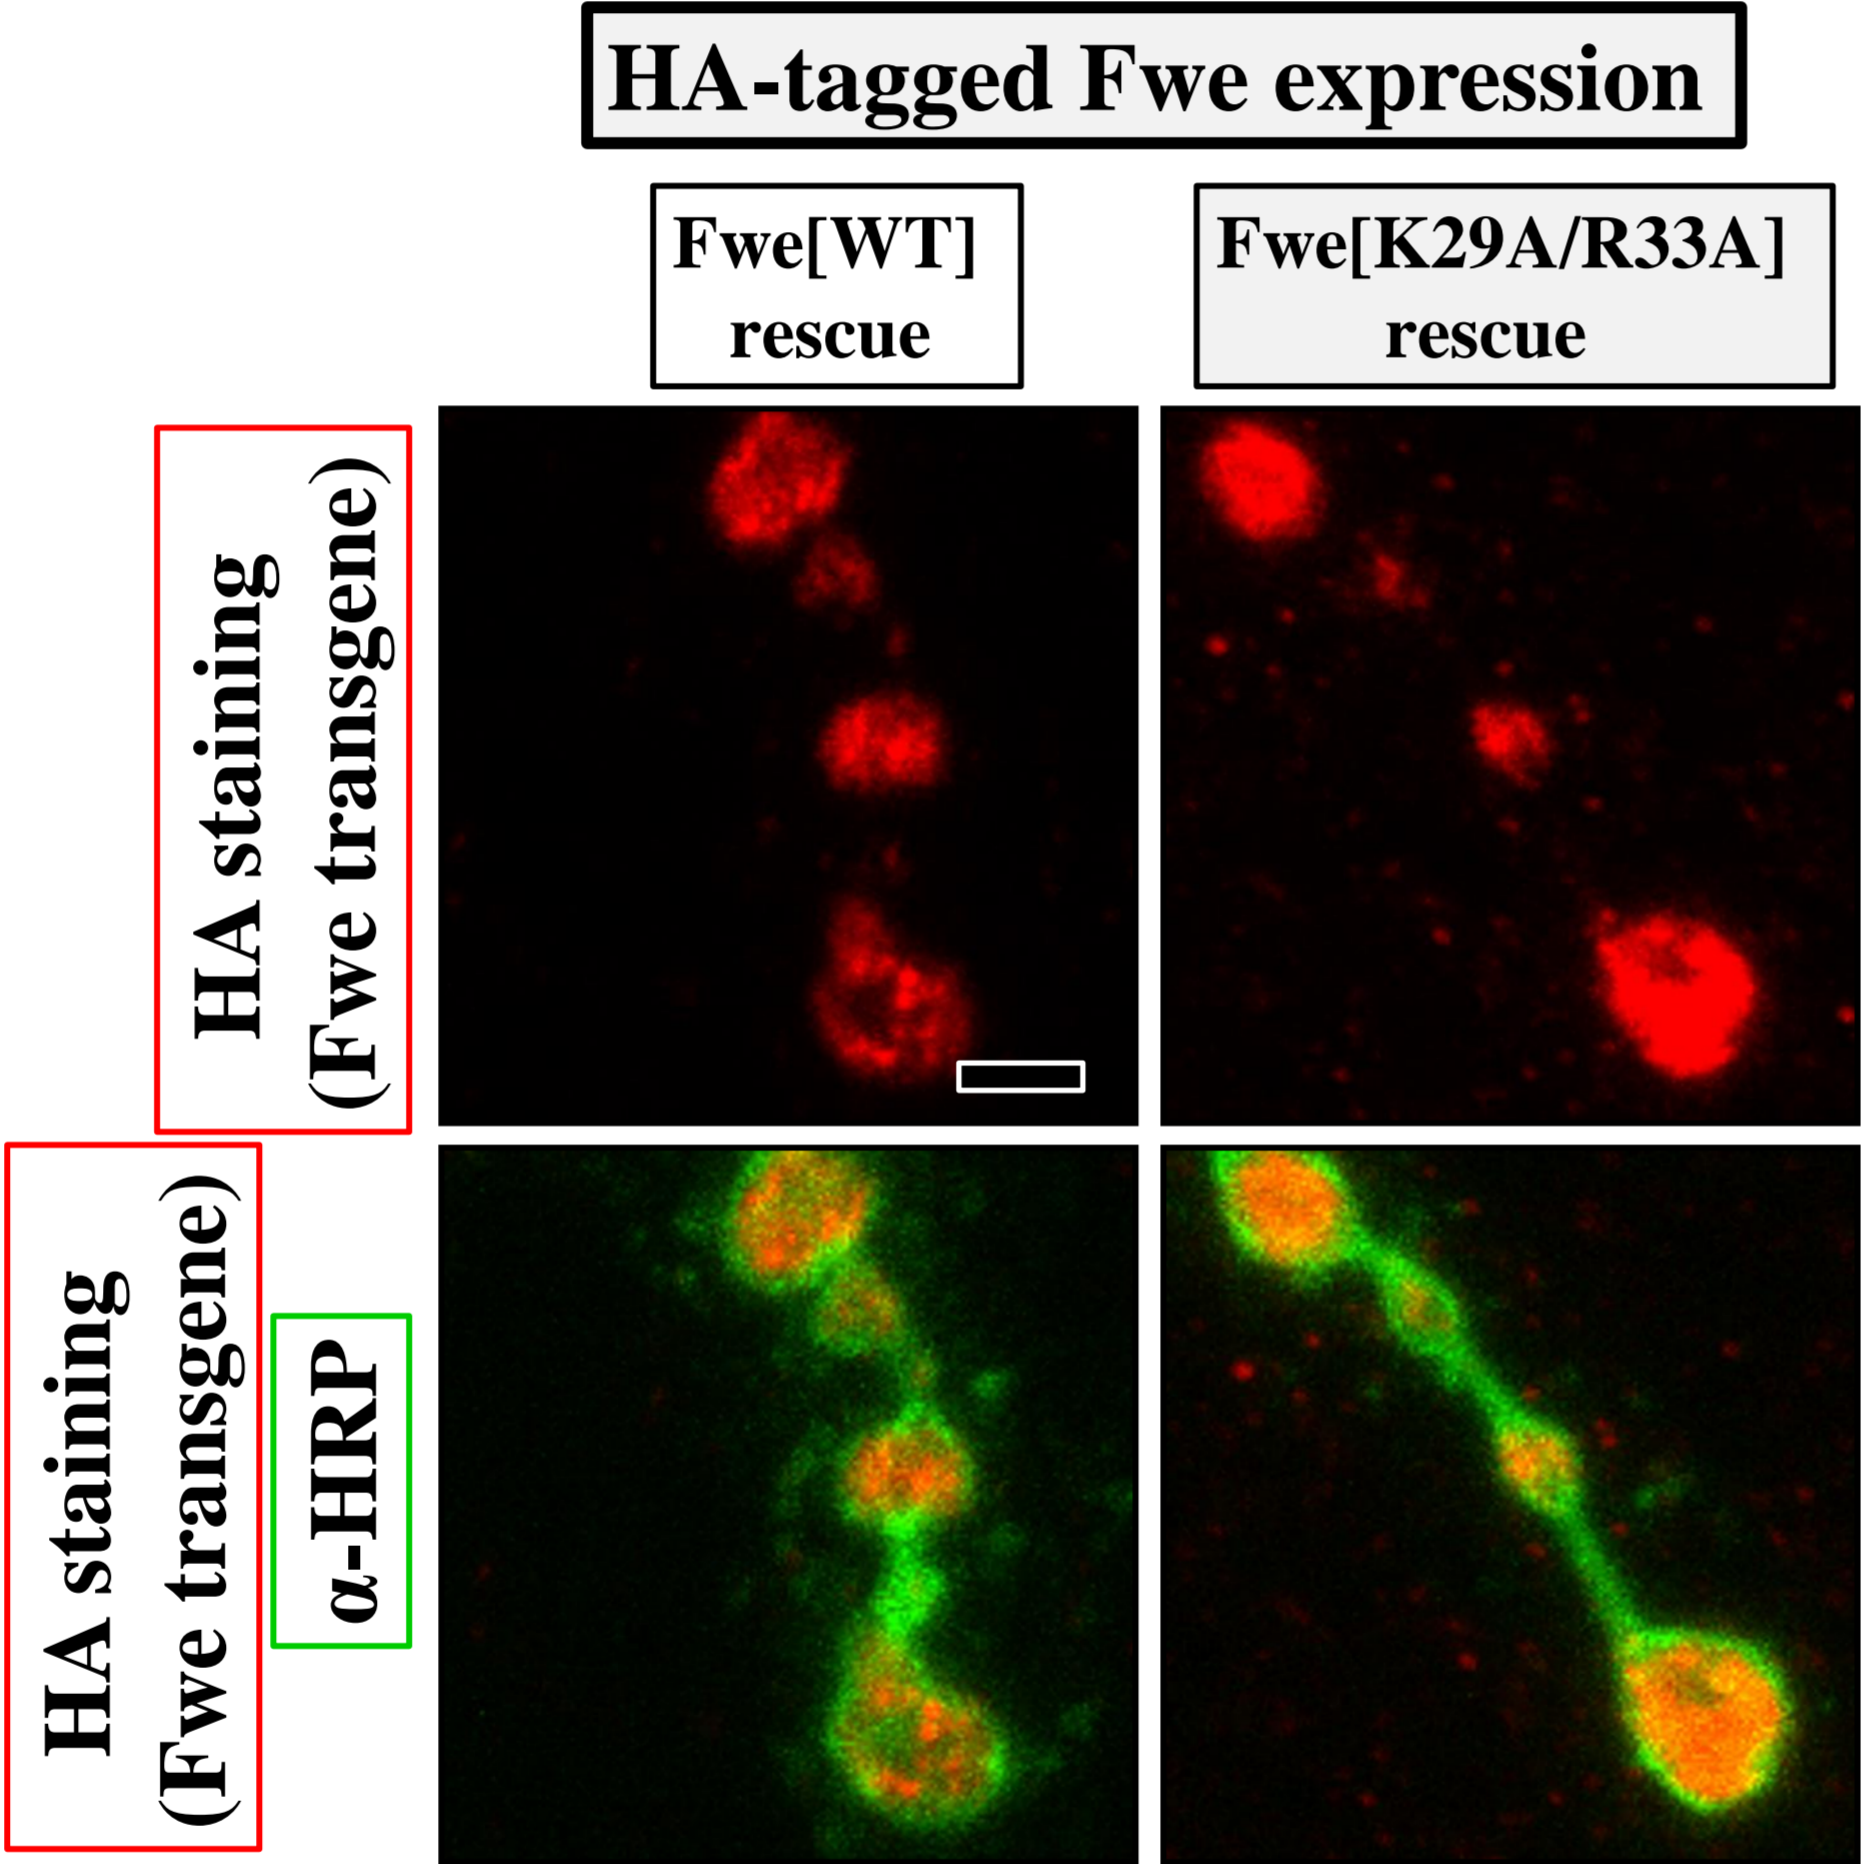

**b**

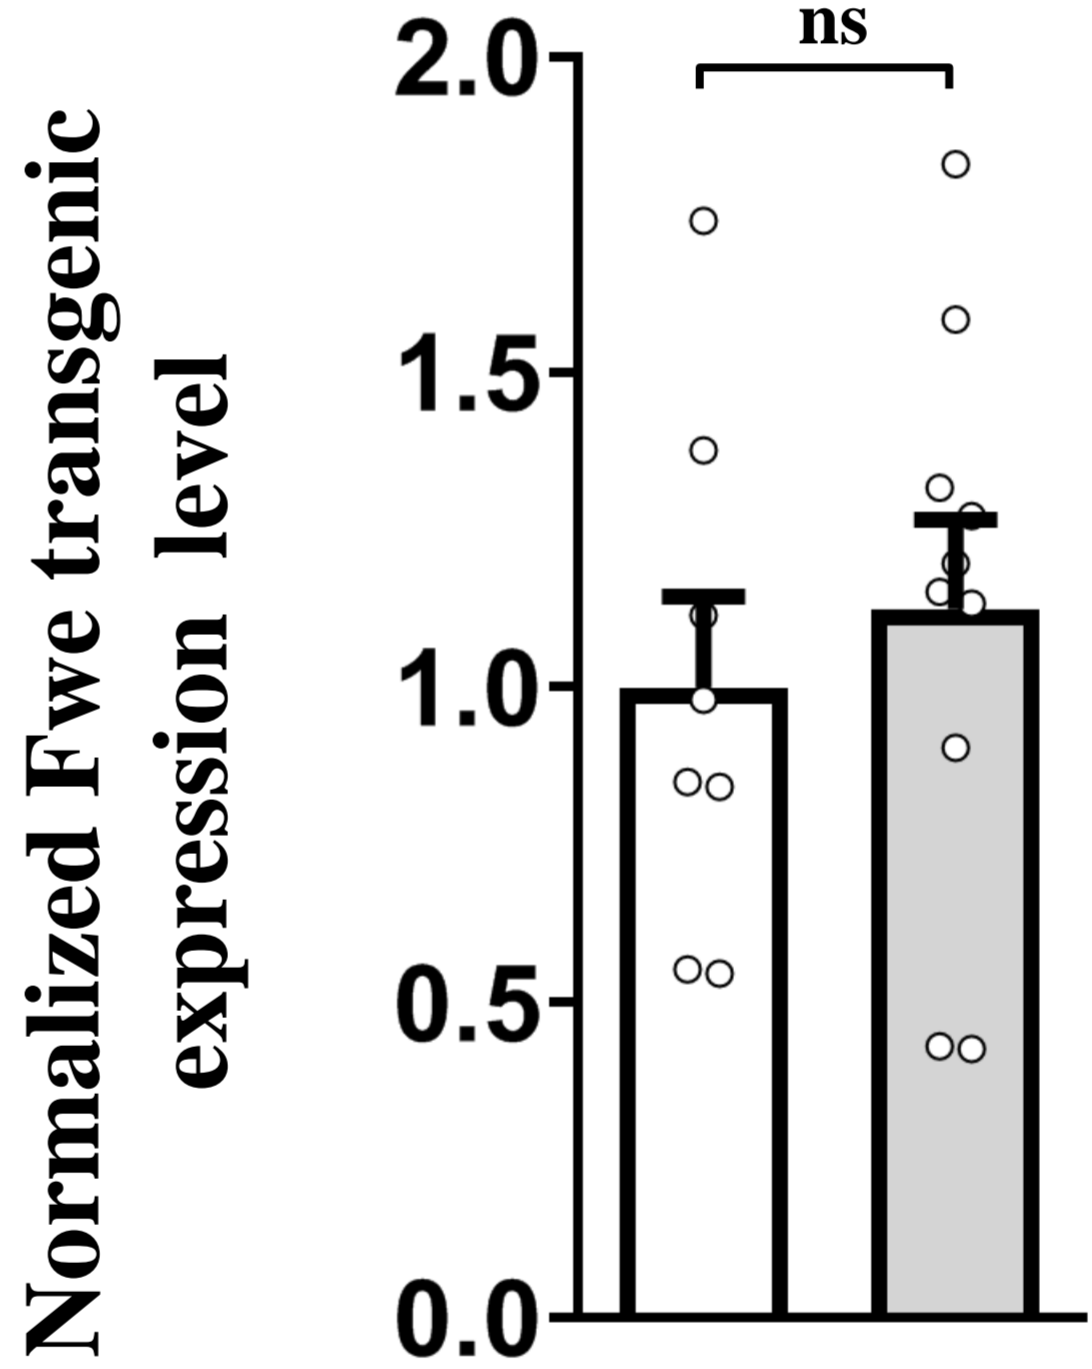

Supplement: supp [file elife_poa_e60125_Figure_4_figure_supplement_2.pdf › elife_poa_e60125_Figure_4_figure_supplement_2.pdf]

Figure 5-figure supplement 1

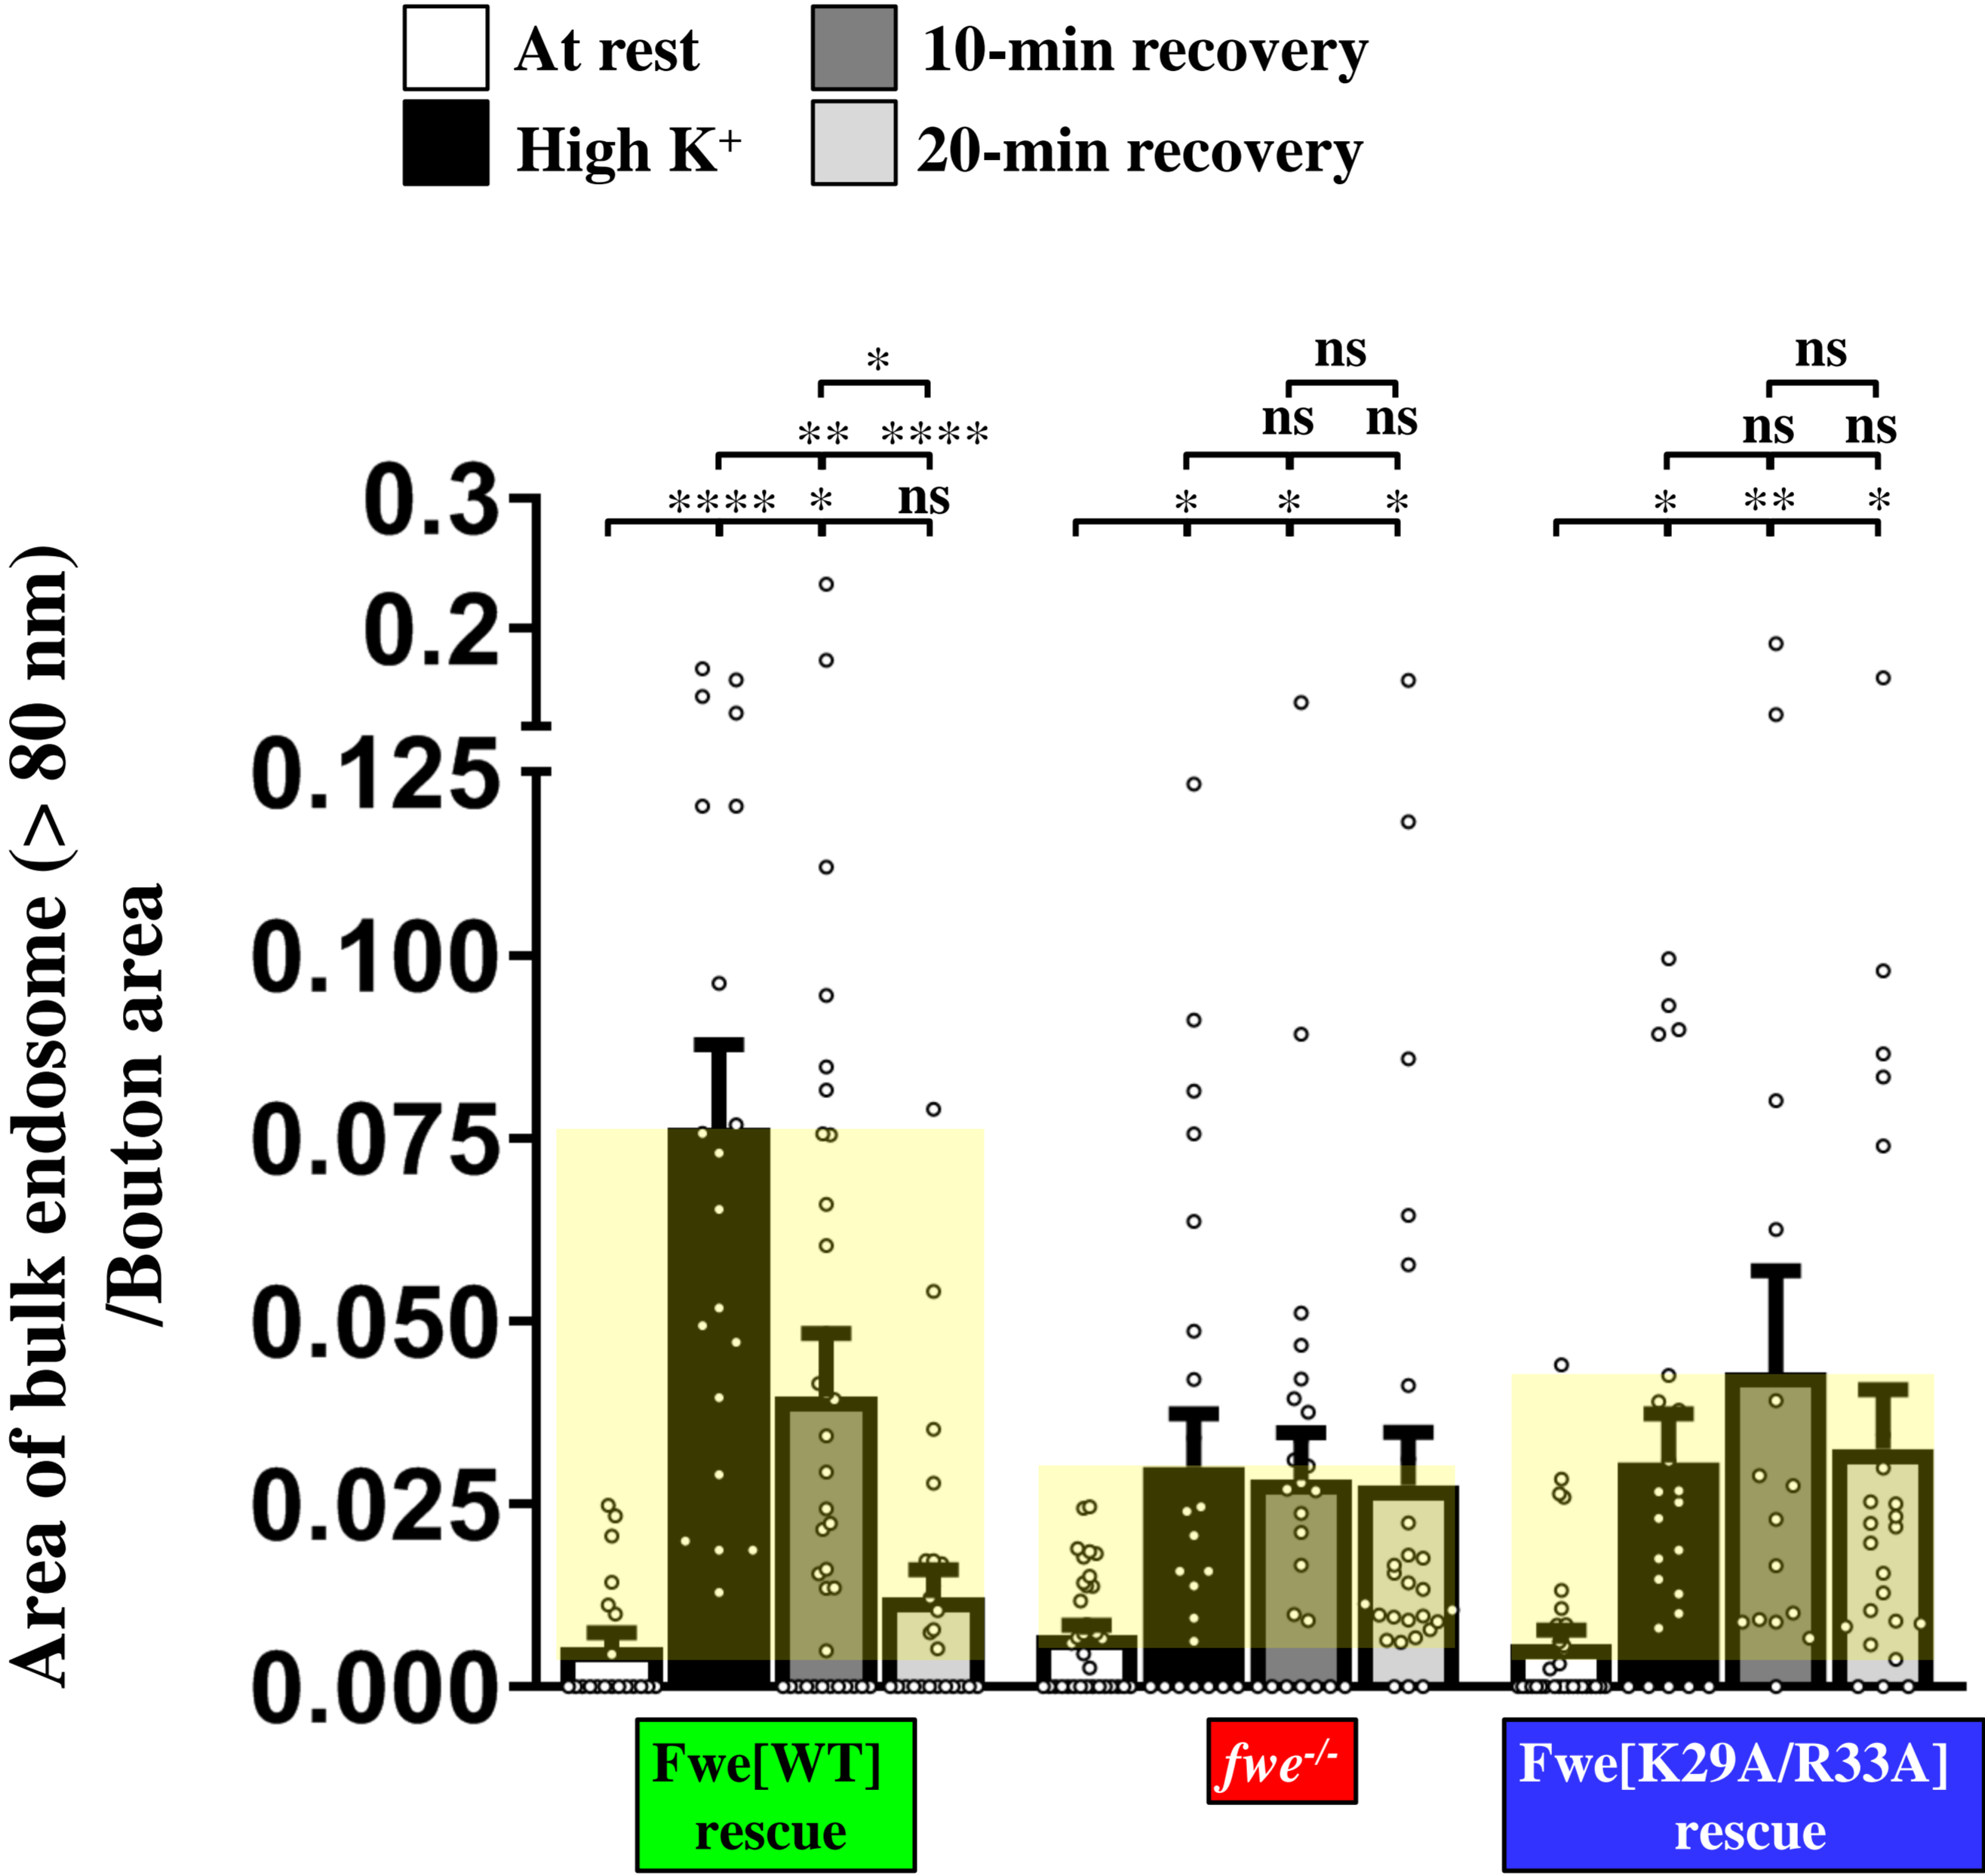

Supplement: supp [file elife_poa_e60125_Figure_5_figure_supplement_1.pdf › elife_poa_e60125_Figure_5_figure_supplement_1.pdf]

# Figure 6-figure supplement 1

**a**

HA-Fwe-APEX2 rescue

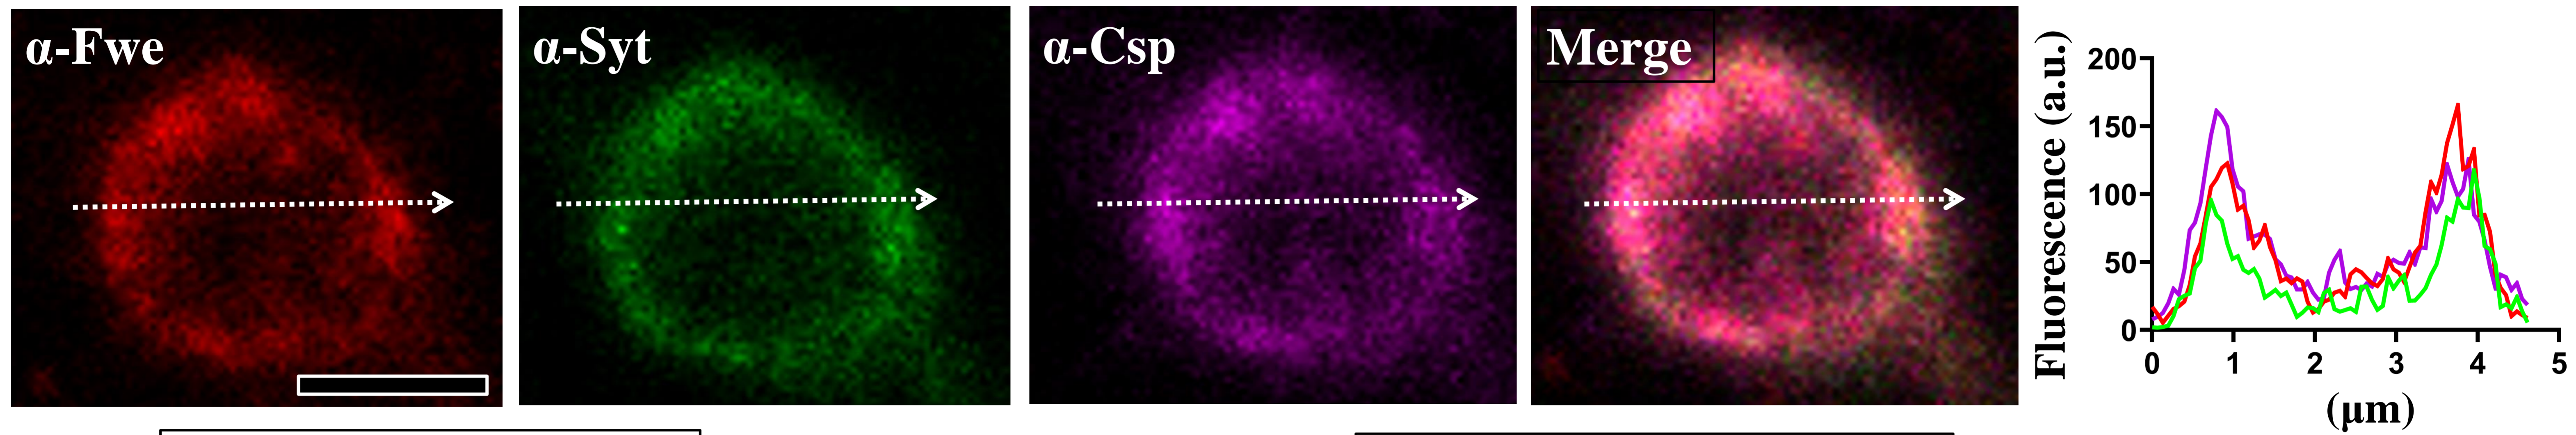

Flag-Fwe-HA rescue (DAB)

HA-Fwe-APEX2 rescue (DAB)

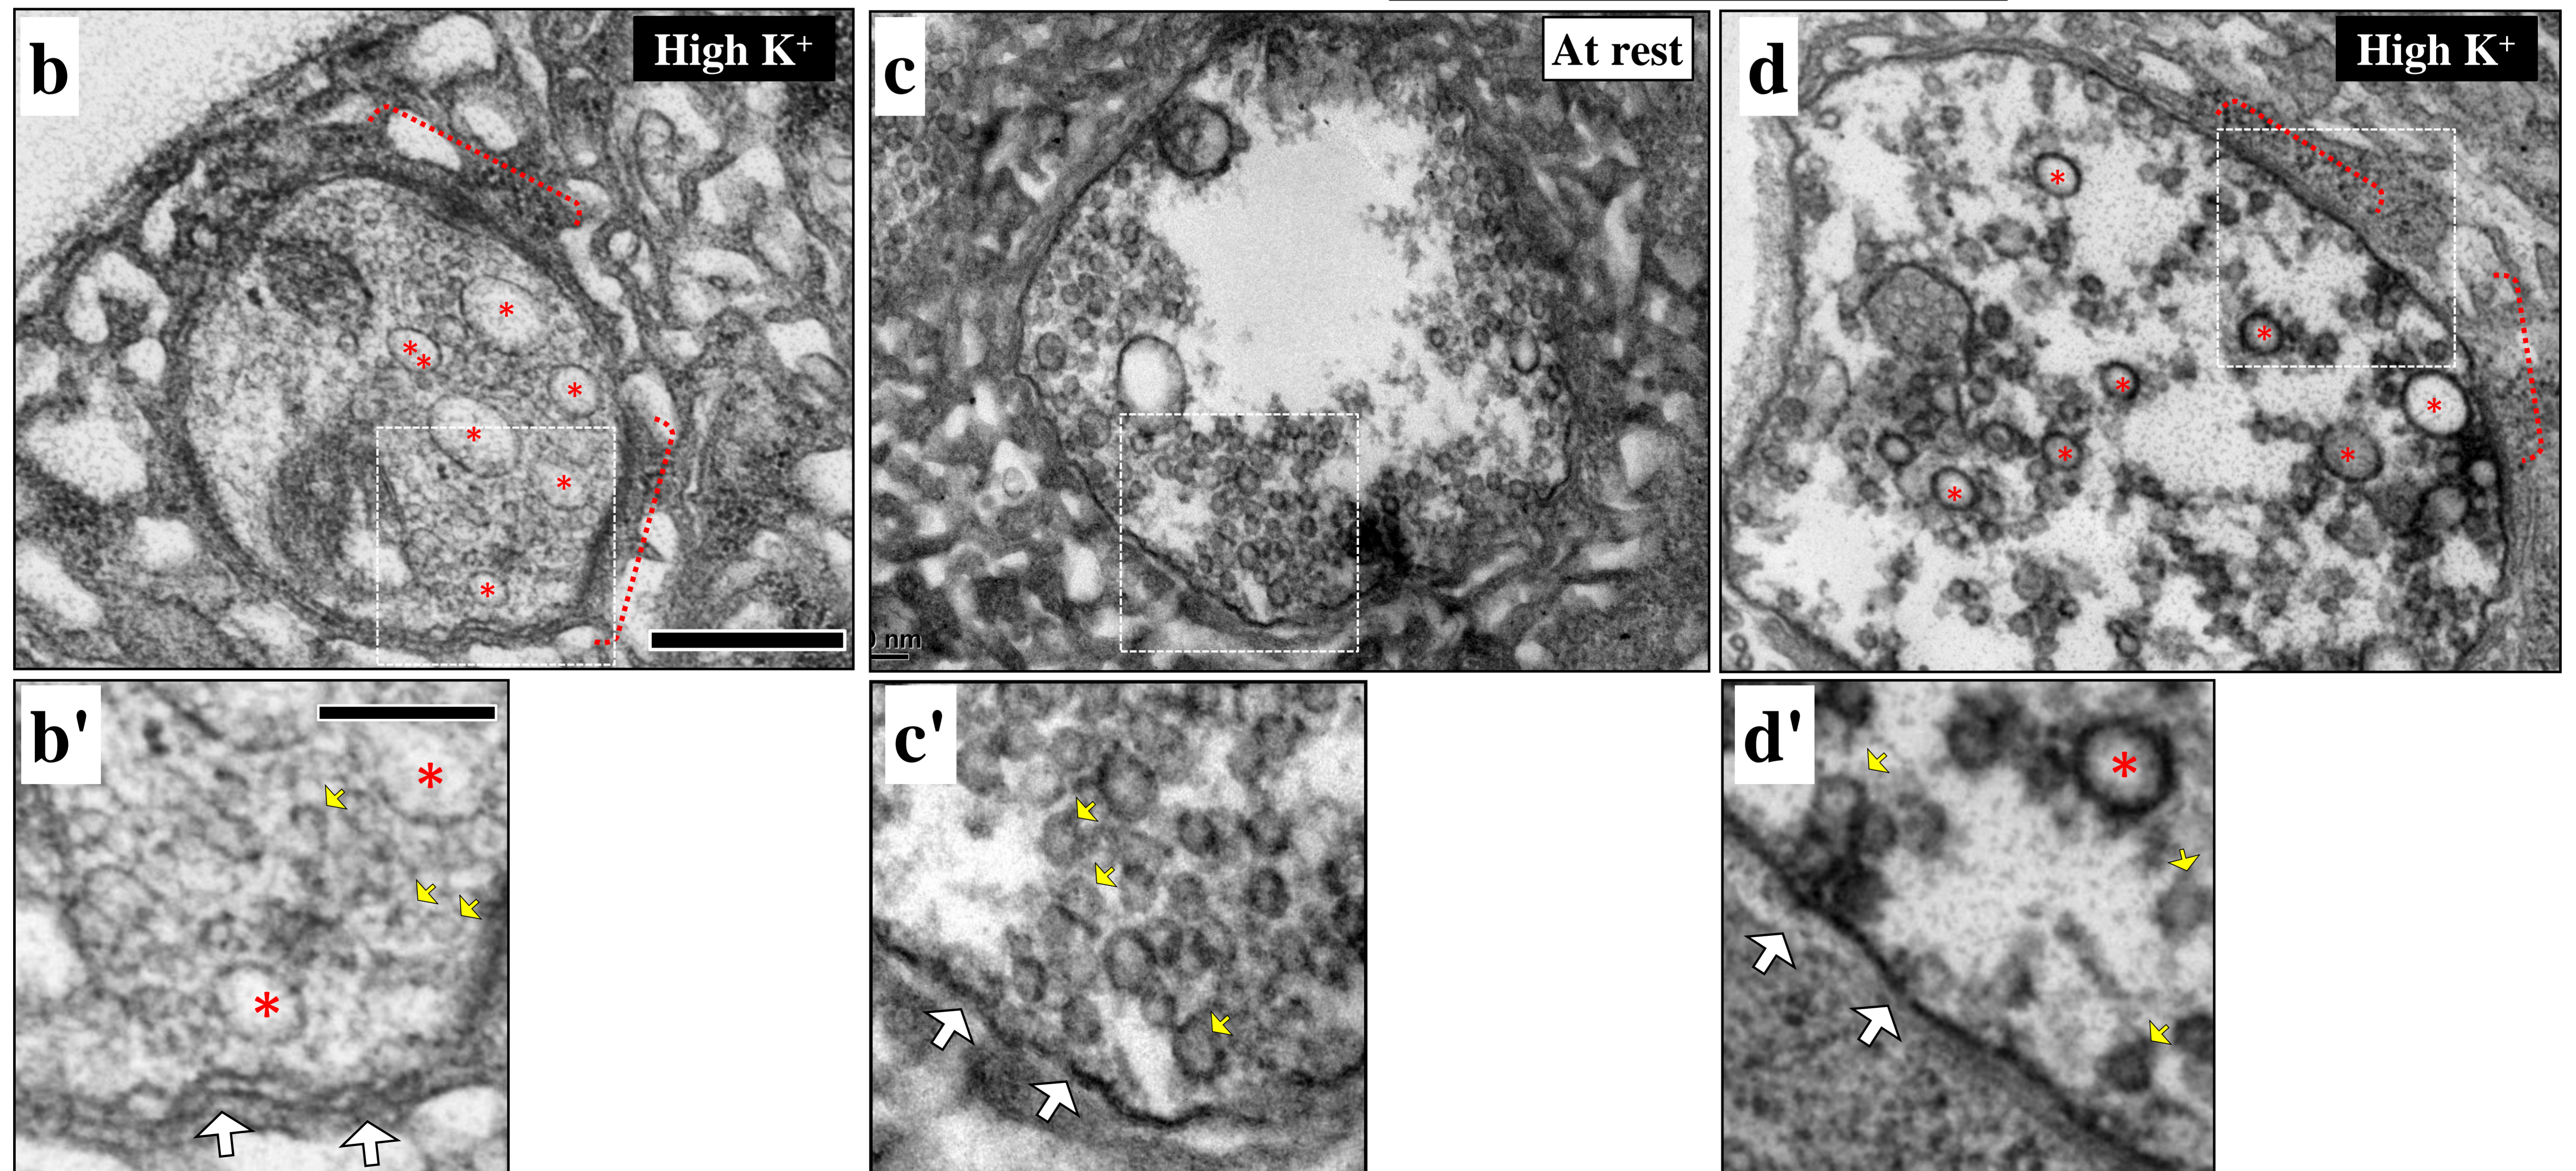

Supplement: supp [file elife_poa_e60125_Figure_6_figure_Supplement_1.pdf › elife_poa_e60125_Figure_6_figure_Supplement_1.pdf]
